# Supplementary material for: Role of the (pseudo)halido ligand in ruthenium(ii) p-cymene α-amino acid complexes in speciation, protein reactivity and cytotoxicity
Source: Royal Society of Chemistry journal article supplement (doi:10.1039/d1dt03274g), 2021-01-01
Supplement: d1dt03274g1.pdf [file d1dt03274g1.pdf]

# Supporting Information

## Role of the (Pseudo)Halido Ligand in Ruthenium(II) *p*-Cymene $\alpha$ -Amino Acid Complexes on Speciation, Protein Reactivity and Cytotoxicity

Lorenzo Biancalana,<sup>a</sup> Emanuele Zanda,<sup>a</sup> Mouna Hadiji,<sup>b</sup> Stefano Zacchini,<sup>c</sup> Alessandro Pratesi,<sup>a</sup>  
Guido Pampaloni,<sup>a</sup> Paul J. Dyson<sup>b</sup> and Fabio Marchetti<sup>a</sup>

<sup>a</sup> University of Pisa, Dipartimento di Chimica e Chimica Industriale, Via G. Moruzzi 13, I-56124 Pisa,  
Italy.

<sup>b</sup> Institut des Sciences et Ingénierie Chimiques, Ecole Polytechnique Fédérale de Lausanne (EPFL),  
Switzerland.

<sup>c</sup> University of Bologna, Dipartimento di Chimica Industriale "Toso Montanari", Viale Risorgimento 4, I-  
40136 Bologna, Italy.

| Table of contents                                                                                                   | Pages   |
|---------------------------------------------------------------------------------------------------------------------|---------|
| Synthesis of [RuX <sub>2</sub> ( $\eta^6$ - <i>p</i> -cymene)] <sub>2</sub> (X = Br, I) (Charts S1-S2)              | S2-S3   |
| Comparison of diastereomeric ratios and spectroscopic data (Tables S1-S2)                                           | S4-S5   |
| IR (solid state) and <sup>1</sup> H/ <sup>13</sup> C/ <sup>14</sup> N/ <sup>31</sup> P NMR spectra (Figures S1-S56) | S6-S42  |
| X-ray structural data (Figure S57-S60, Table S3)                                                                    | S43-S46 |
| Speciation in water and in cell culture medium (Figures S61-S72)                                                    | S47-S58 |
| Stability in water and in cell culture medium (Figures S73-S79)                                                     | S59-S65 |
| UV-Vis spectra of <b>2d</b> for Log <i>P</i> <sub>ow</sub> measurement (Figure S80)                                 | S66     |
| Mass spectra following incubation with Cyt c (Figures S81-S87)                                                      | S67-S70 |
| References                                                                                                          | S71     |

## Synthesis of $[\text{RuX}_2(\eta^6\text{-}p\text{-cymene})]_2$ (X = Br, I)

### $[\text{RuBr}_2(\eta^6\text{-}p\text{-cymene})]_2$ (Chart S1).

**Chart S1.** Structure of  $[\text{RuBr}_2(\eta^6\text{-}p\text{-cymene})]_2$  (numbering refers to C atoms).

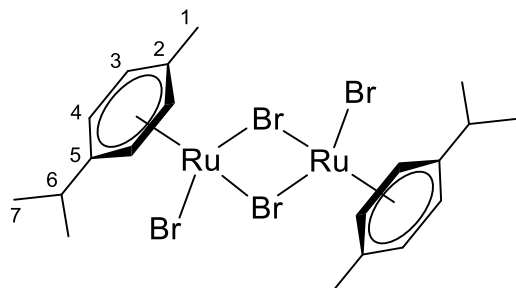

A suspension of  $[\text{RuCl}_2(\eta^6\text{-}p\text{-cymene})]_2$  (186 mg, 0.304 mmol) and NaBr (164 mg, 1.59 mmol) in a  $\text{H}_2\text{O}/\text{MeOH}$  1:1 *v/v* mixture (*ca.* 10 mL) was vigorously stirred at room temperature for 2 h. Next, volatiles were removed under vacuum and the residue was suspended in  $\text{CH}_2\text{Cl}_2$ . The mixture was filtered through celite and the filtrate was dried under vacuum. NaBr (*ca.* 160 mg) was added, and the procedure was repeated ( $\times 3$ ). The final residue was suspended in  $\text{Et}_2\text{O}$  and filtered. The resulting bright orange-red solid was washed with  $\text{Et}_2\text{O}$  and dried under vacuum (40 °C, over  $\text{P}_2\text{O}_5$ ). Yield: 232 mg, 97%. Soluble in acetone,  $\text{CH}_2\text{Cl}_2$ ,  $\text{CHCl}_3$ , poorly soluble in  $\text{H}_2\text{O}$  and  $\text{Et}_2\text{O}$ . Anal. Calcd. For  $\text{C}_{20}\text{H}_{28}\text{Br}_4\text{Ru}_2$ : C, 30.40; H, 3.57. Found: C, 29.96; H, 3.38. IR (solid state):  $\tilde{\nu}/\text{cm}^{-1}$  = 3048w, 3034m, 2956m, 2924m-sh, 2867w, 1527w, 1493m, 1469s, 1442s-sh, 1407m, 1385s, 1377s-sh, 1363m-sh, 1324m, 1274m, 1198m, 1156m, 1114m, 1087m, 1055s, 1028s-sh, 1004m, 957w, 825wm, 903w, 876s, 861s, 803s, 727s, 692m, 689m, 667m.  $^1\text{H}$  NMR ( $\text{CDCl}_3$ ):  $\delta/\text{ppm}$  = 5.49 (d,  $^3J_{\text{HH}} = 5.9$  Hz, 2H,  $\text{C}^4\text{H}$ ), 5.37 (d,  $^3J_{\text{HH}} = 5.9$  Hz, 2H,  $\text{C}^3\text{H}$ ), 2.95 (h,  $^3J_{\text{HH}} = 6.9$  Hz, 1H,  $\text{C}^6\text{H}$ ), 2.21 (s, 3H,  $\text{C}^1\text{H}$ ), 1.26 (d,  $^3J_{\text{HH}} = 6.9$  Hz, 6H,  $\text{C}^7\text{H}$ ).

**[RuI<sub>2</sub>(η<sup>6</sup>-*p*-cymene)]<sub>2</sub> (Chart S2).**

**Chart S2.** Structure of [RuI<sub>2</sub>(η<sup>6</sup>-*p*-cymene)]<sub>2</sub> (numbering refers to C atoms).

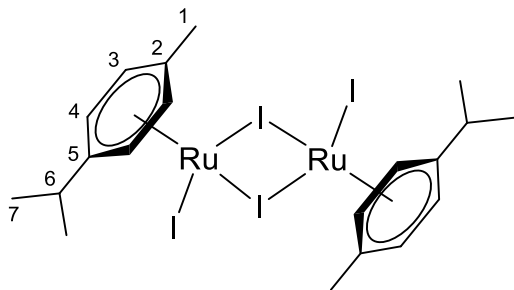

A suspension of [RuCl<sub>2</sub>(η<sup>6</sup>-*p*-cymene)]<sub>2</sub> (401 mg, 0.550 mmol) and NaI (597 mg, 3.98 mmol) in acetone (35 mL) was stirred at reflux temperature for 2.5 h. The resulting red/violet suspension was cooled to room temperature and taken to dryness under vacuum. The residue was suspended in CH<sub>2</sub>Cl<sub>2</sub> and the suspension was filtered twice on a celite pad. Volatiles were removed under vacuum from the filtrate solution, affording a dark Bordeaux-red solid. The solid was washed with hexane then dried under vacuum (40 °C, over P<sub>2</sub>O<sub>5</sub>). Yield: 577 mg, 90%. Soluble in acetone, CH<sub>2</sub>Cl<sub>2</sub>, CHCl<sub>3</sub>, poorly soluble in EtOH, Et<sub>2</sub>O, insoluble in H<sub>2</sub>O, petroleum ether and MeOH. Anal. Calcd. For C<sub>20</sub>H<sub>28</sub>I<sub>4</sub>Ru<sub>2</sub>: C, 24.56; H, 2.89. Found: C, 24.79; H, 2.77. IR (solid state):  $\tilde{\nu}/\text{cm}^{-1}$  = 3028w, 2961m, 2924w, 2866w, 1902w, 1865w, 1785w, 1759w, 1735w, 1689w, 1530w, 1496w, 1469s, 1441w, 1407w, 1381s, 1375s, 1359m-sh, 1324w, 1296m, 1277m, 1211m, 1197m, 1156m, 1141m, 1115m, 1085m, 1055s, 1025s, 1006m, 958w, 923m, 888m, 866s, 801m, 734w, 659w. <sup>1</sup>H NMR (CDCl<sub>3</sub>):  $\delta/\text{ppm}$  = 5.53 (d, <sup>3</sup>J<sub>HH</sub> = 5.9 Hz, 2H, C<sup>4</sup>H), 5.43 (d, <sup>3</sup>J<sub>HH</sub> = 5.8 Hz, 2H, C<sup>3</sup>H), 3.01 (hept, <sup>3</sup>J<sub>HH</sub> = 6.9 Hz, 1H, C<sup>6</sup>H), 2.36 (s, 3H, C<sup>1</sup>H), 1.25 (d, <sup>3</sup>J<sub>HH</sub> = 6.9 Hz, 6H, C<sup>7</sup>H).

## Comparison of diastereomeric ratios and spectroscopic data.

**Table S1.** Diastereomeric ratios of [RuX( $\kappa^2N,O$ -amino carboxylate)( $\eta^6$ -*p*-cymene)] complexes in CD<sub>3</sub>OD or D<sub>2</sub>O solution by <sup>1</sup>H NMR.

| Compound                                   | Amino acid                        | Monodentate ligand           | Diastereomeric ratio          |                              |
|--------------------------------------------|-----------------------------------|------------------------------|-------------------------------|------------------------------|
|                                            |                                   |                              | Methanol (CD <sub>3</sub> OD) | Water (D <sub>2</sub> O) [a] |
| <b>1a</b>                                  | L-proline                         | Cl <sup>-</sup>              | 6.5 [b]                       | 7                            |
| <b>1b</b>                                  | “                                 | Br <sup>-</sup>              | 8                             | 6                            |
| <b>1c</b>                                  | “                                 | I <sup>-</sup>               | 6.5                           | 16                           |
| <b>1d</b>                                  | “                                 | NCS <sup>-</sup>             | 2                             | 1                            |
| <b>1e</b>                                  | “                                 | N <sub>3</sub> <sup>-</sup>  | 4                             | 2.5                          |
| <b>1f</b>                                  | “                                 | NO <sub>2</sub> <sup>-</sup> | 5                             | <i>n.d.</i>                  |
| <b>1g</b>                                  | “                                 | CN <sup>-</sup>              | 8                             | <i>n.d.</i>                  |
| <b>[1w]<sup>+</sup></b>                    | “                                 | H <sub>2</sub> O             | <i>n.d.</i>                   | 2.6                          |
| <b>2a</b>                                  | <i>trans</i> -4-hydroxy-L-proline | Cl <sup>-</sup>              | 2 [b]                         | 3.5                          |
| <b>2b</b>                                  | “                                 | Br <sup>-</sup>              | 4                             | 5                            |
| <b>2c</b>                                  | “                                 | I <sup>-</sup>               | 5                             | 6.5                          |
| <b>2d</b>                                  | “                                 | NCS <sup>-</sup>             | 1                             | 1.5                          |
| <b>2e</b>                                  | “                                 | N <sub>3</sub> <sup>-</sup>  | 1.5                           | 2                            |
| <b>[2w]<sup>+</sup></b>                    | “                                 | H <sub>2</sub> O             | <i>n.d.</i>                   | 1.5                          |
| <b>3a</b>                                  | L-serine                          | Cl <sup>-</sup>              | 1.4 [b]                       | 1.4                          |
| <b>[3-PPh<sub>3</sub>]<sup>+</sup> [c]</b> | “                                 | PPh <sub>3</sub>             | 5 [b]                         | 5 [b]                        |
| <b>[3i]<sup>+</sup></b>                    | “                                 | pta                          | 1.3                           | 1.3                          |

[a] In the presence of excess Cl<sup>-</sup> (**1-3a**), Br<sup>-</sup> (**1-2b**) or I<sup>-</sup> (**1-2c**). [b] Data taken from the literature.<sup>1</sup> [c] **[3-PPh<sub>3</sub>]<sup>+</sup>** =

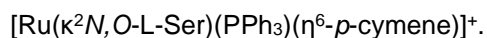

**Table S2.** IR/NMR fingerprints of SCN<sup>-</sup>, N<sub>3</sub><sup>-</sup>, CN<sup>-</sup>, NO<sub>2</sub><sup>-</sup> coordination in [RuX<sub>2</sub>(η<sup>6</sup>-*p*-cymene)]<sub>2</sub> and [RuX(κ<sup>2</sup>N, O-amino carboxylate)(η<sup>6</sup>-*p*-cymene)] complexes and reference sodium/potassium salts.

| Compound                                                                                          | Amino acid | Monodentate ligand X         | <sup>13</sup> C NMR: <sup>[a]</sup> δ / ppm | <sup>14</sup> N NMR: <sup>[a]</sup> δ / ppm | IR (solid state): <sup>[b]</sup> $\tilde{\nu}$ / cm <sup>-1</sup>                          |
|---------------------------------------------------------------------------------------------------|------------|------------------------------|---------------------------------------------|---------------------------------------------|--------------------------------------------------------------------------------------------|
| KSCN                                                                                              | -          |                              | 133                                         | - 180                                       | v(NCS): 2043, 2002                                                                         |
| [Ru(SCN) <sub>2</sub> (η <sup>6</sup> - <i>p</i> -cymene)] <sub>2</sub>                           | -          | SCN <sup>-</sup>             | 137, 136, 134<br>(NCS)<br>125 (SCN)         | - 279                                       | v(NCS): 2146 ( <i>SCN</i> ),<br>2094 (NCS)                                                 |
| 1d                                                                                                | Pro        |                              | 139                                         | - 264                                       | v(NCS): 2094, 2054                                                                         |
| 2d                                                                                                | Hyp        |                              | 139                                         | - 264                                       | v(NCS): 2089, 2050                                                                         |
| NaN <sub>3</sub>                                                                                  | -          |                              | -                                           | - 134, - 285                                | v(N <sub>3</sub> ): 2140 [c]                                                               |
| [Ru(N <sub>3</sub> ) <sub>2</sub> (η <sup>6</sup> - <i>p</i> -cymene)] <sub>2</sub>               | -          |                              | -                                           | - 129, - 234                                | v(N <sub>3</sub> ): 2059, 2040                                                             |
| [Ru(N <sub>3</sub> ) <sub>2</sub> (η <sup>6</sup> -C <sub>6</sub> Me <sub>6</sub> )] <sub>2</sub> | -          | N <sub>3</sub> <sup>-</sup>  | -                                           | -                                           | v(N <sub>3</sub> ): 2064, 2024 [c]                                                         |
| 1e                                                                                                | Pro        |                              | -                                           | - 130, - 241                                | v(N <sub>3</sub> ): 2027                                                                   |
| 2e                                                                                                | Hyp        |                              | -                                           | - 130, - 240                                | v(N <sub>3</sub> ): 2025                                                                   |
| NaNO <sub>2</sub>                                                                                 | -          |                              | -                                           | 230                                         | V <sub>asym</sub> (NO <sub>2</sub> ): 1324sh.<br>V <sub>sym</sub> (NO <sub>2</sub> ): 1226 |
| 1f                                                                                                | Pro        | NO <sub>2</sub> <sup>-</sup> | -                                           | - 349                                       | V <sub>asym</sub> (NO <sub>2</sub> ): 1365<br>V <sub>sym</sub> (NO <sub>2</sub> ): 1304    |
| KCN                                                                                               | -          |                              | 98 [d]                                      | -                                           | v(CN): 2077 [c]                                                                            |
| 1g                                                                                                | Pro        | CN <sup>-</sup>              | 139                                         | -                                           | v(CN): 2105                                                                                |

[a] NMR data in CD<sub>3</sub>OD except [Ru(SCN)<sub>2</sub>(η<sup>6</sup>-*p*-cymene)]<sub>2</sub>, [Ru(N<sub>3</sub>)<sub>2</sub>(η<sup>6</sup>-*p*-cymene)]<sub>2</sub> (<sup>13</sup>C, <sup>14</sup>N NMR) and 1d (<sup>14</sup>N NMR) (in acetone) and KCN (in water). [b] Shoulder peak of the SCN absorption in *italic*. [c] IR data taken from the literature.<sup>2</sup> [d] NMR data taken from the literature.<sup>3</sup>

## IR (solid state) and $^1\text{H}/^{13}\text{C}/^{14}\text{N}/^{31}\text{P}$ NMR spectra.

**Figure S1.** Solid-state IR spectrum ( $650\text{-}4000\text{ cm}^{-1}$ ) of  $[\text{RuBr}_2(\eta^6\text{-}p\text{-cymene})]_2$ .

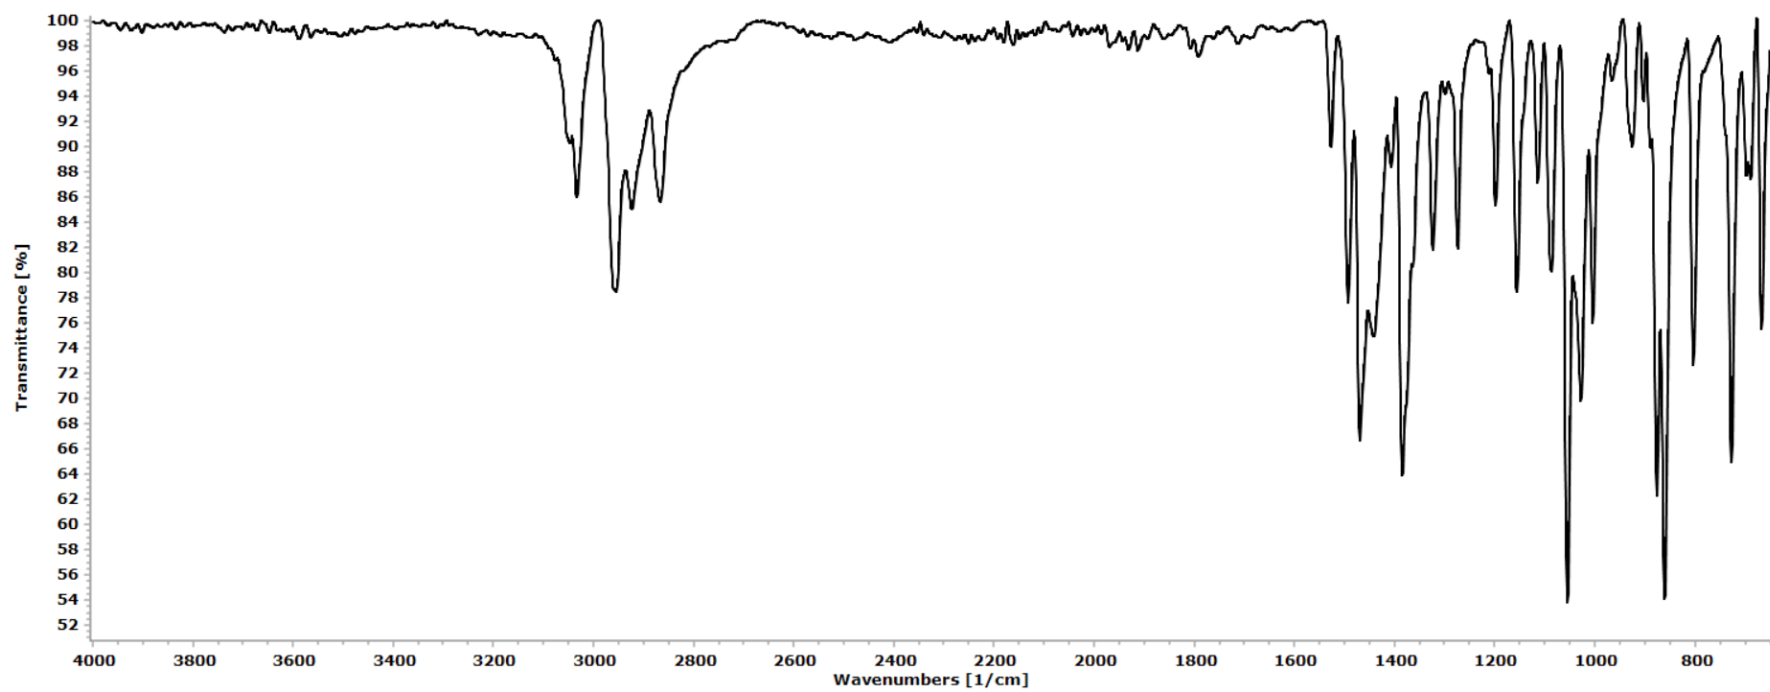

**Figure S2.** Solid-state IR spectrum (650-4000  $\text{cm}^{-1}$ ) of  $[\text{RuI}_2(\eta^6\text{-}p\text{-cymene})]_2$ .

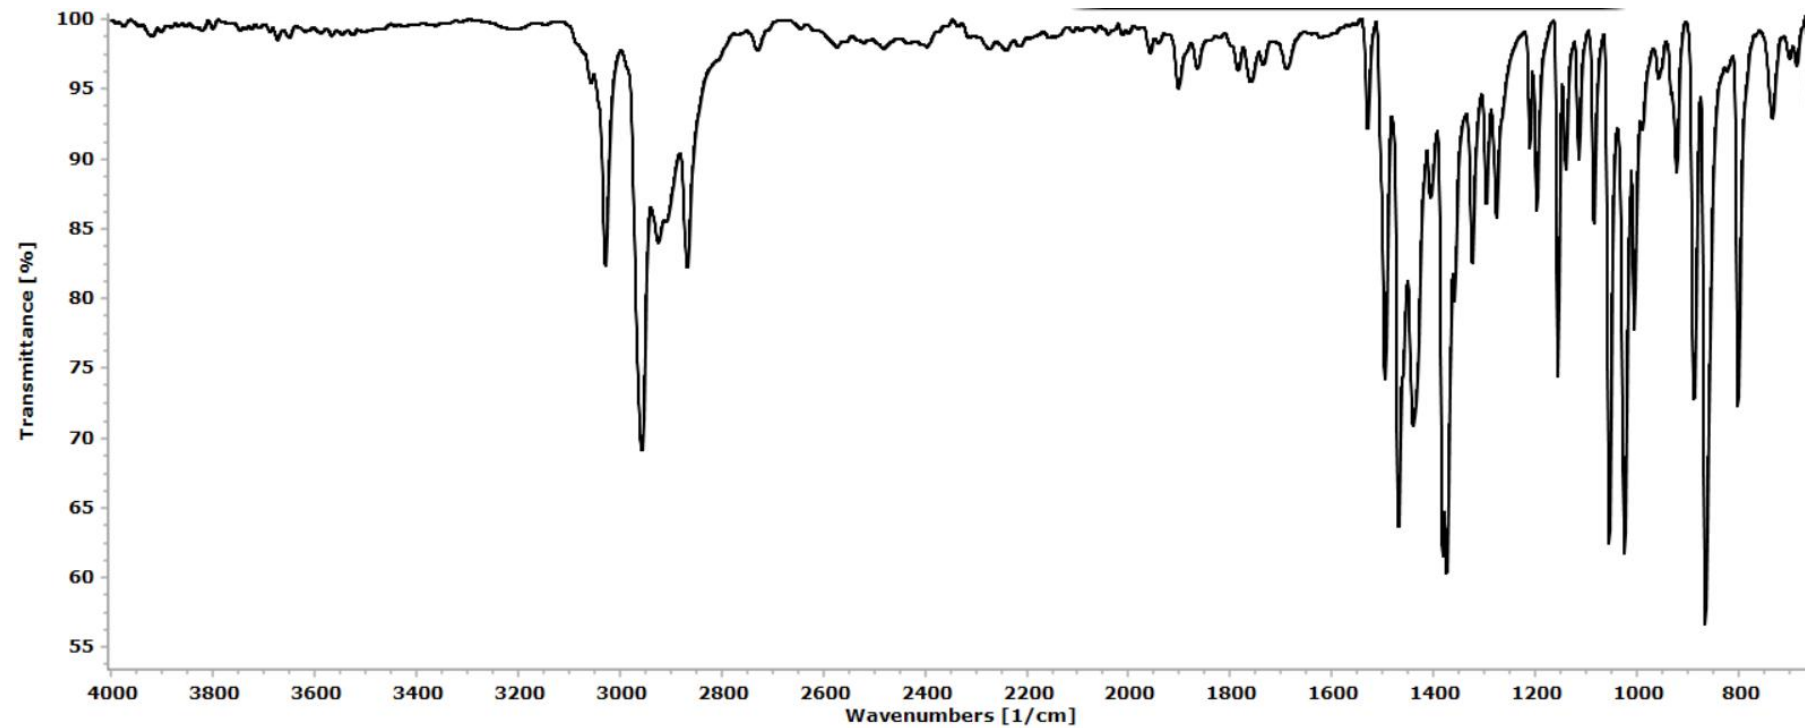

**Figure S3.** Solid-state IR spectrum (650-4000  $\text{cm}^{-1}$ ) of  $[\text{Ru}(\text{SCN})_2(\eta^6\text{-}p\text{-cymene})]_2$ .

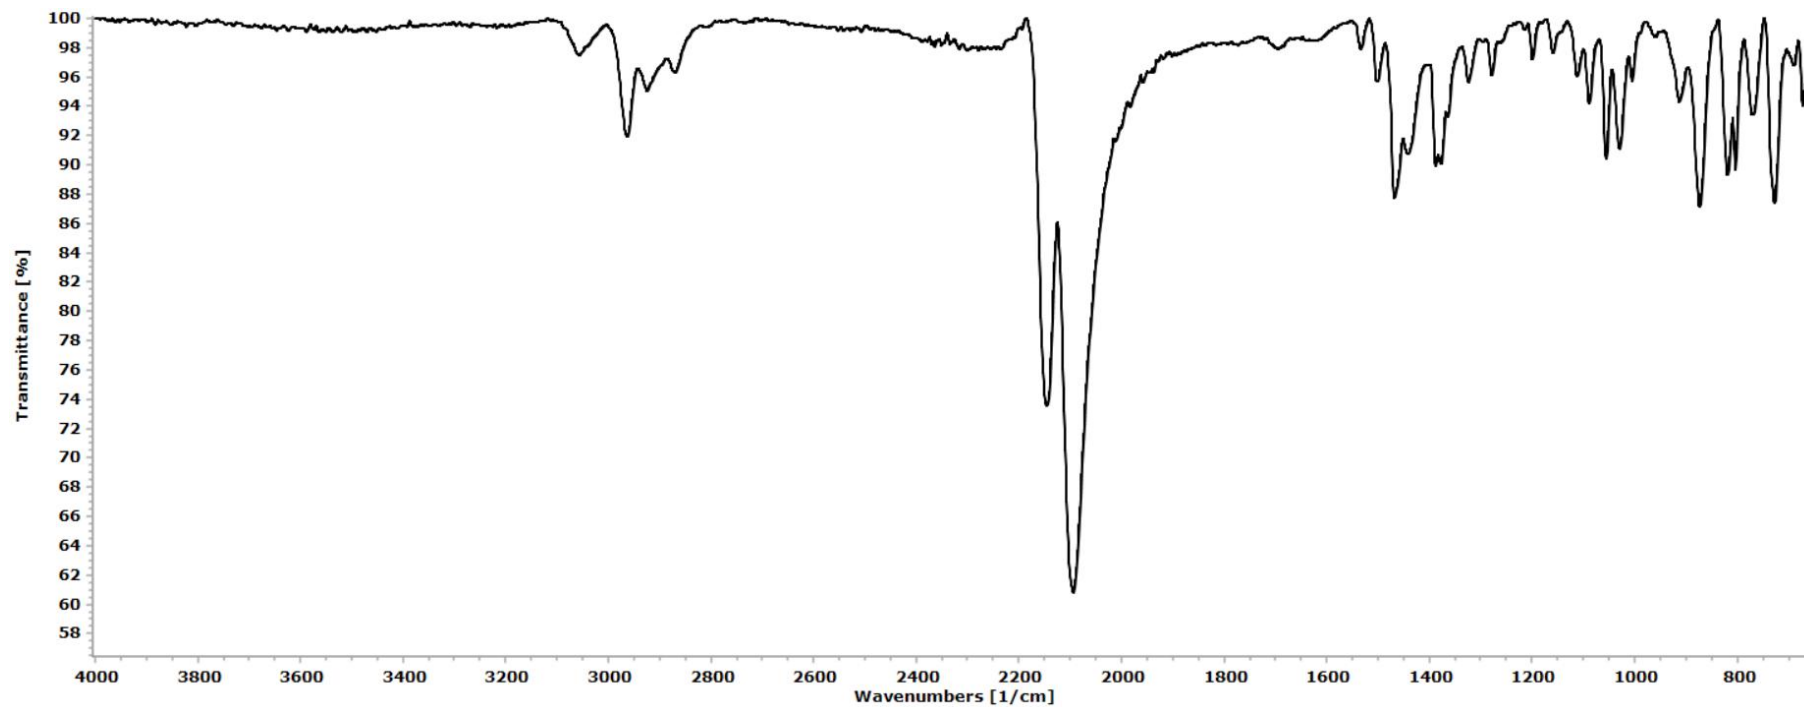



**Figure S4.** Solid-state IR spectrum (650-4000  $\text{cm}^{-1}$ ) of  $[\text{Ru}(\text{N}_3)_2(\eta^6\text{-}p\text{-cymene})]_2$ .

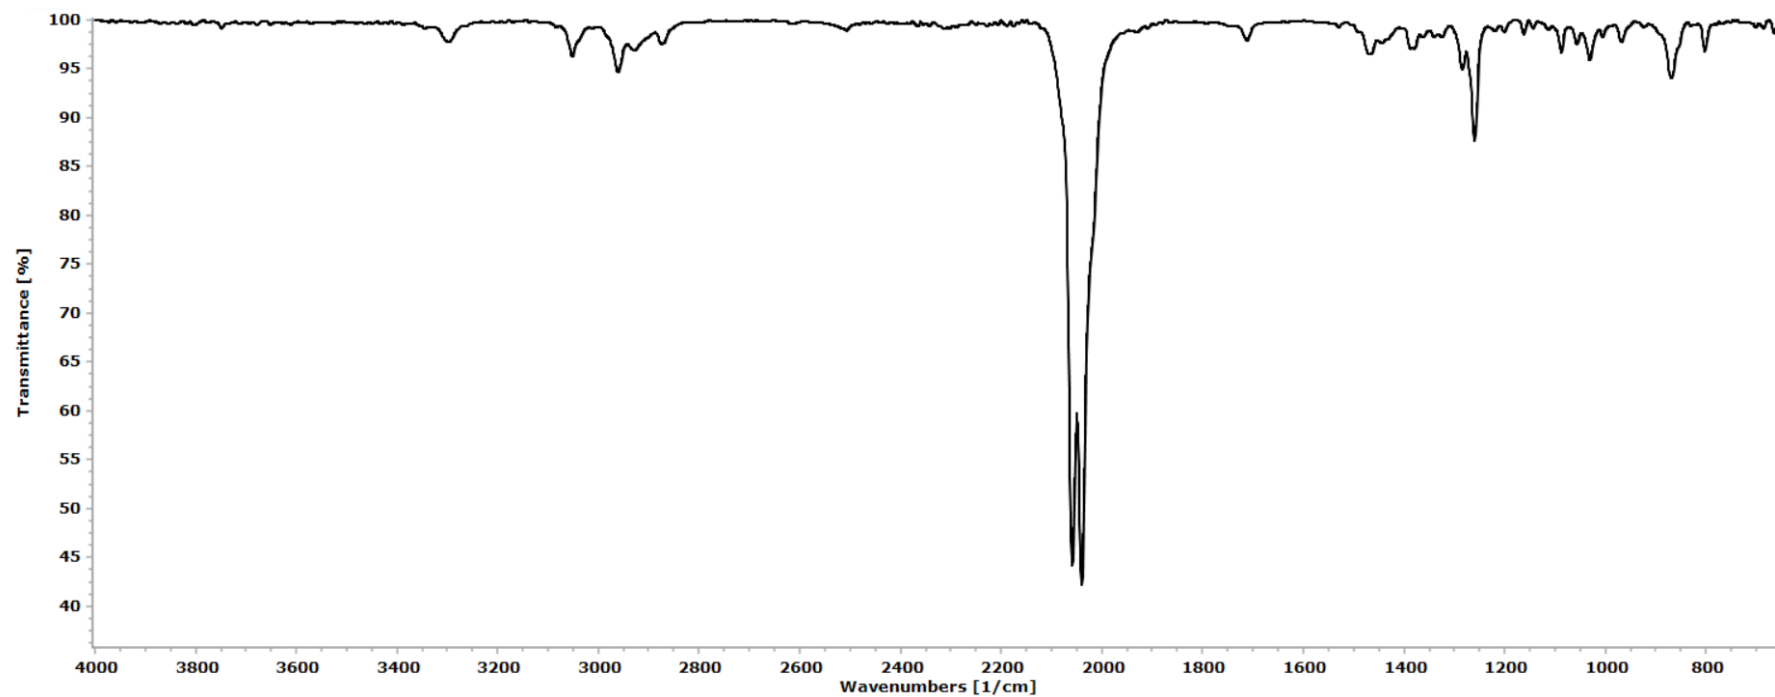

**Figure S5.** Solid-state IR spectrum (650-4000  $\text{cm}^{-1}$ ) of  $[\text{RuBr}(\kappa^2\text{N}, \text{O-Pro})(\eta^6\text{-}p\text{-cymene})]$ , **1b**.

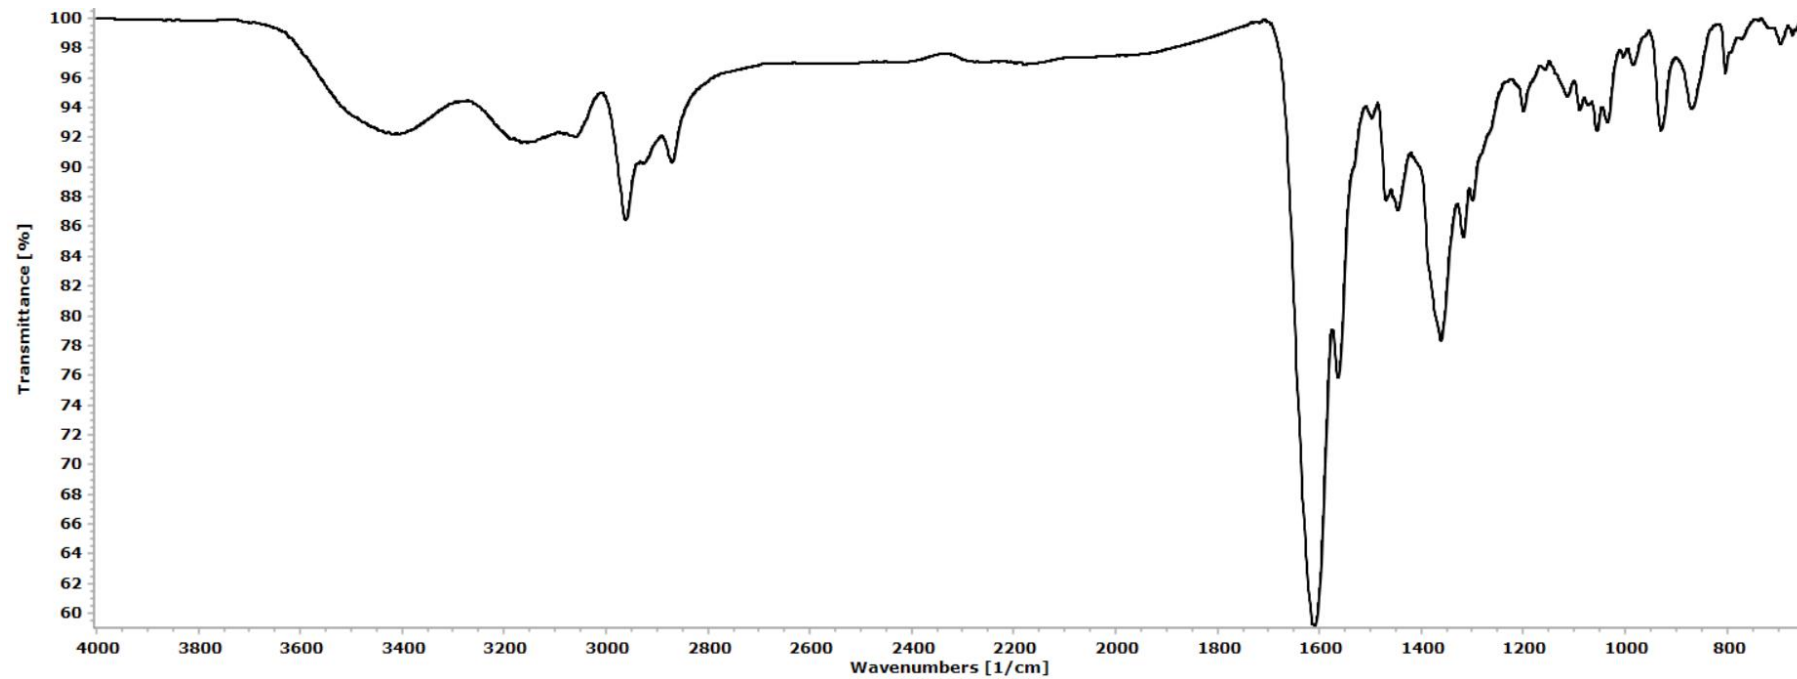

**Figure S6.** Solid-state IR spectrum (650-4000  $\text{cm}^{-1}$ ) of  $[\text{Ru}(\kappa^2\text{N}, \text{O-Pro})(\eta^6\text{-}p\text{-cymene})]$ , **1c**.

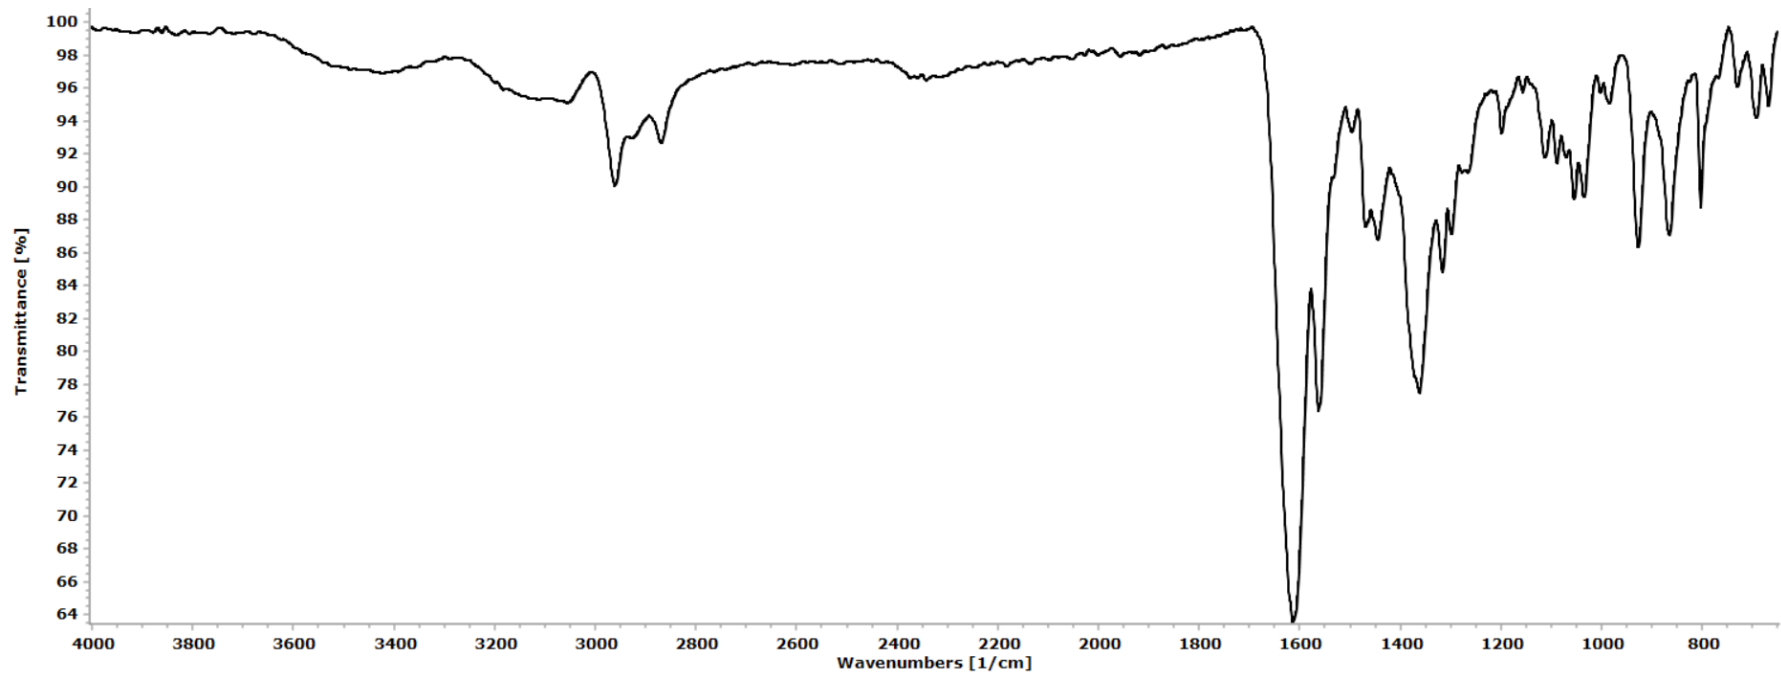

**Figure S7.** Solid-state IR spectrum (650-4000  $\text{cm}^{-1}$ ) of  $[\text{Ru}(\kappa\text{N-NCS})(\kappa^2\text{N,O-Pro})(\eta^6\text{-}p\text{-cymene})]$ , **1d**.

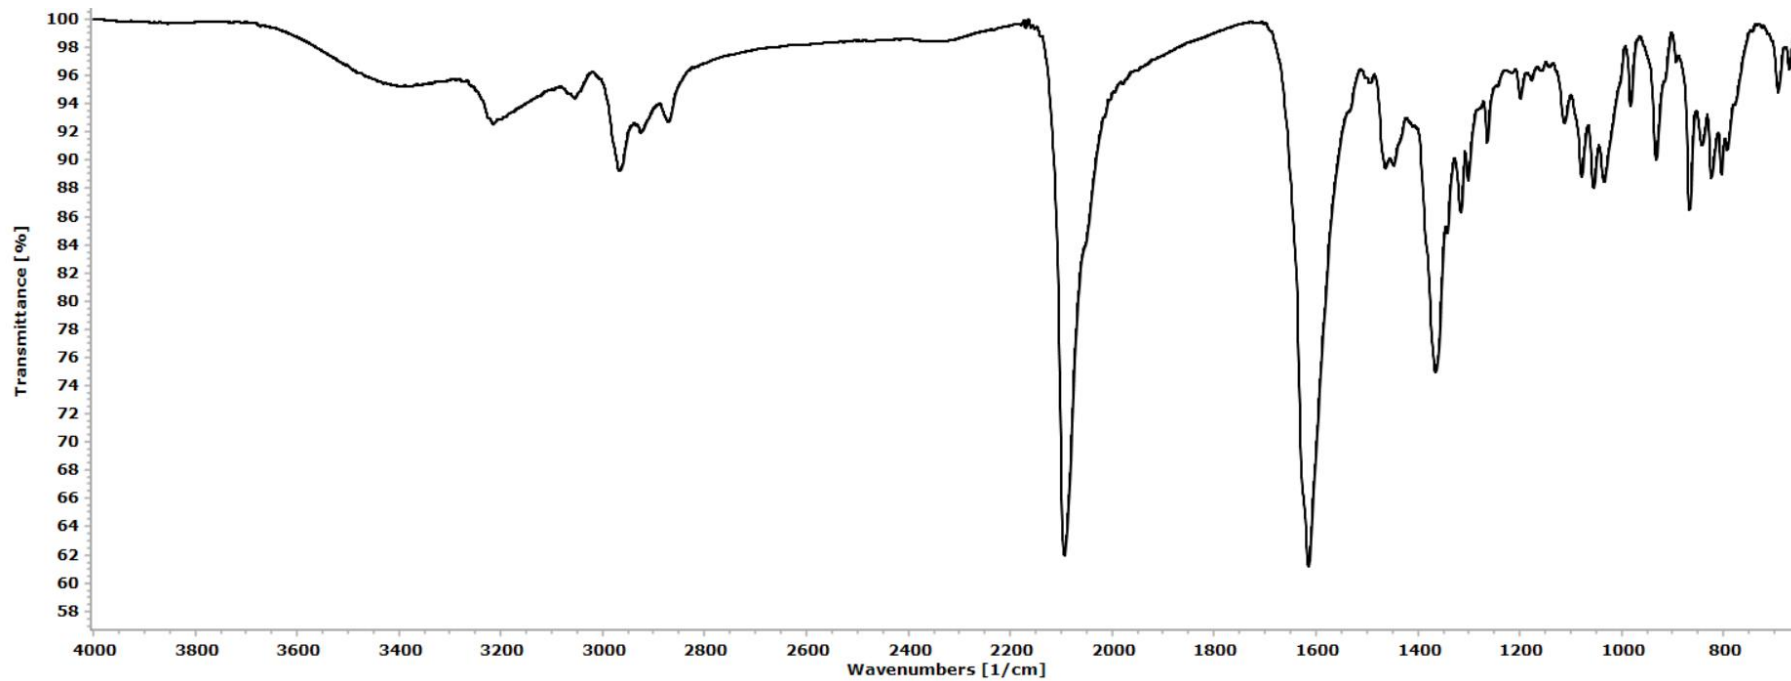

**Figure S8.** Solid-state IR spectrum (650-4000  $\text{cm}^{-1}$ ) of  $[\text{Ru}(\text{N}_3)(\kappa^2\text{N},\text{O-Pro})(\eta^6\text{-}p\text{-cymene})]$ , **1e**.

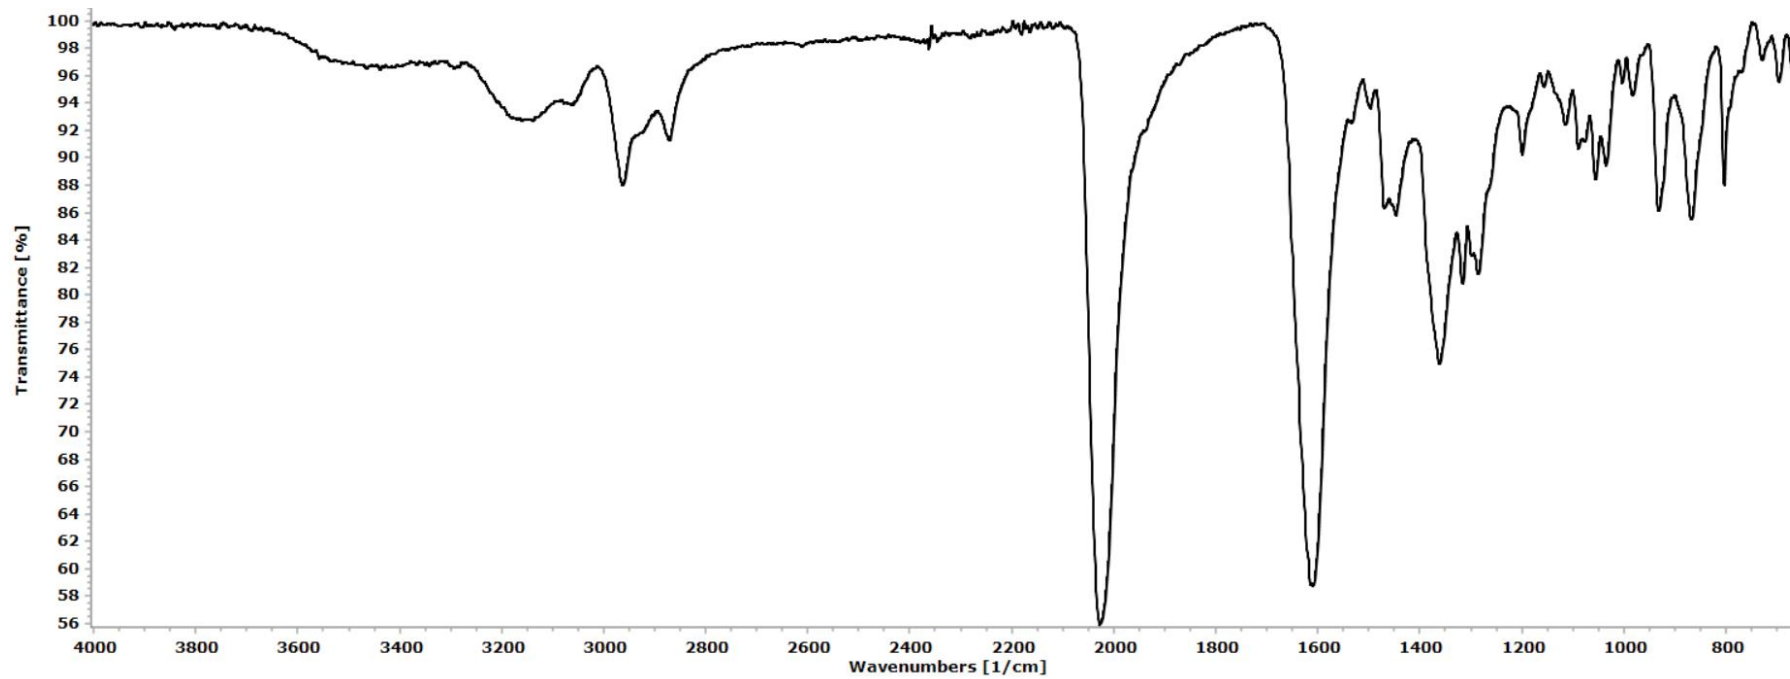

**Figure S9.** Solid-state IR spectrum (650-4000  $\text{cm}^{-1}$ ) of  $[\text{Ru}(\kappa\text{N-NO}_2)(\kappa^2\text{N,O-Pro})(\eta^6\text{-}p\text{-cymene})]$ , **1f**.

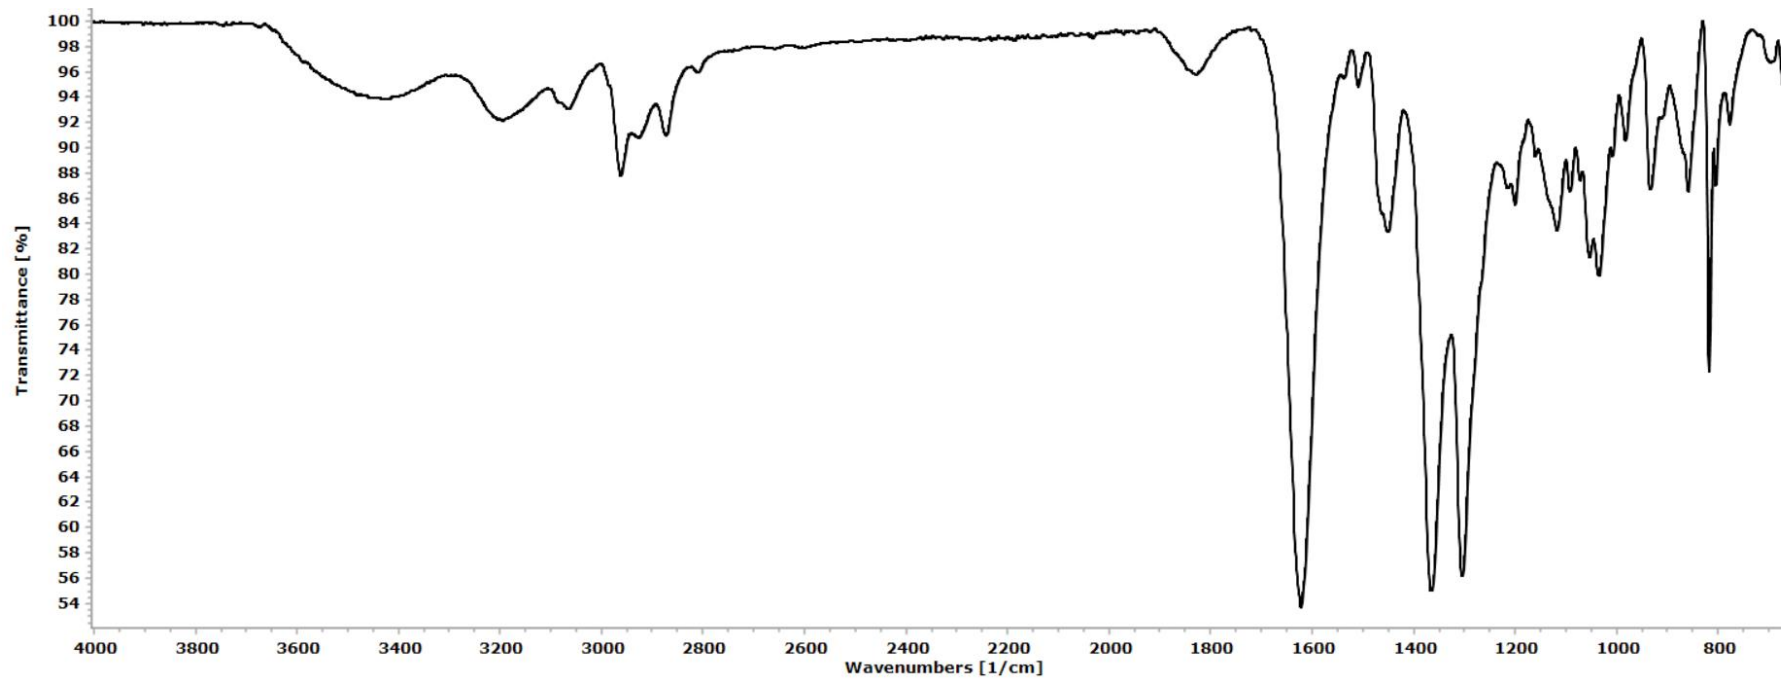

Figure S10. Solid-state IR spectrum (650-4000  $\text{cm}^{-1}$ ) of  $[\text{Ru}(\text{CN})(\kappa^2\text{N}, \text{O-Pro})(\eta^6\text{-}p\text{-cymene})]$ , **1g**.

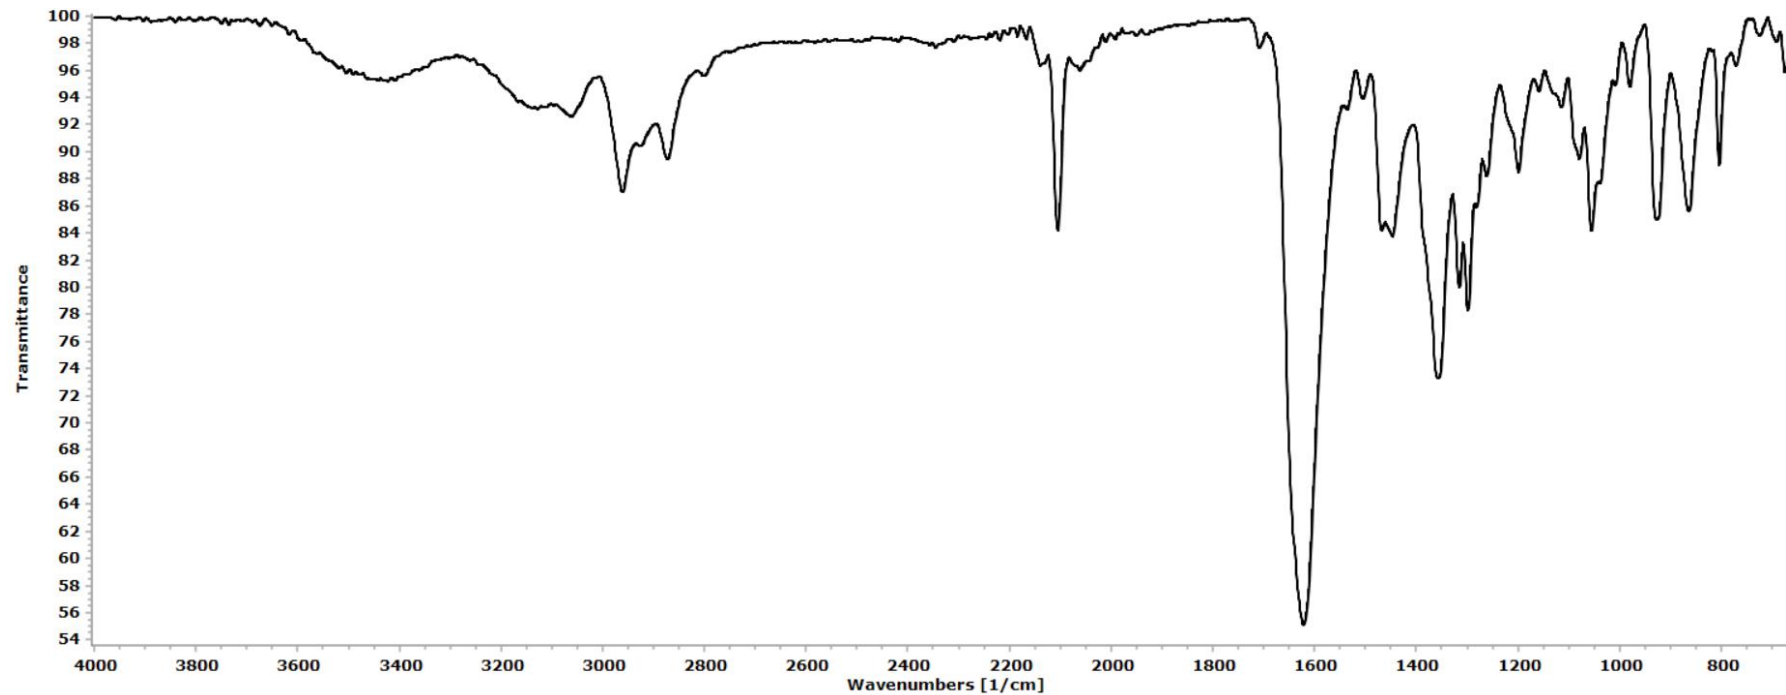

**Figure S111.** Solid-state IR spectrum (650-4000  $\text{cm}^{-1}$ ) of  $[\text{RuBr}(\kappa^2\text{N}, \text{O-Hyp})(\eta^6\text{-}p\text{-cymene})]$ , **2b**.

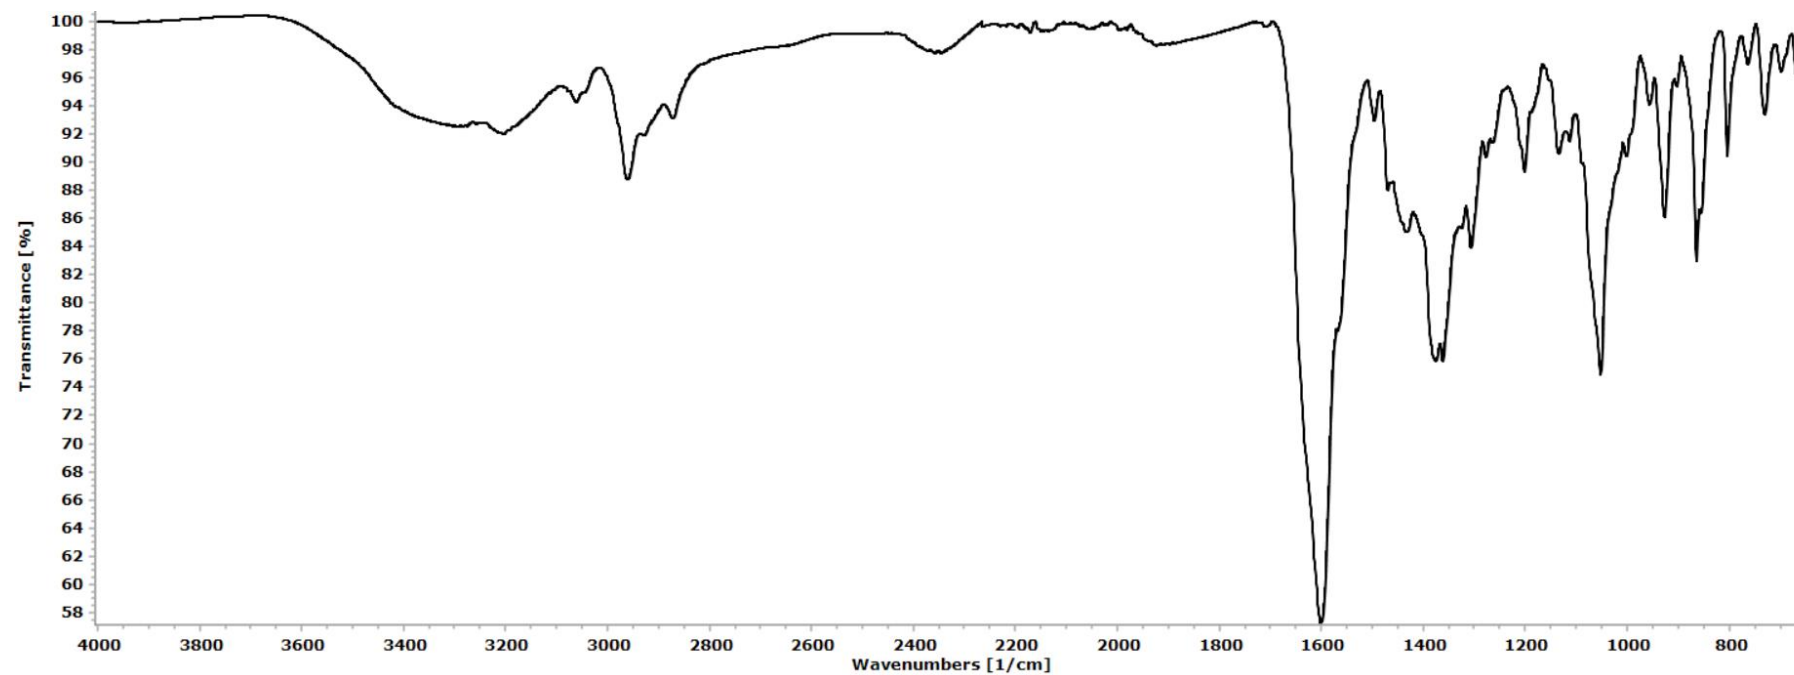



**Figure S12.** Solid-state IR spectrum (650-4000  $\text{cm}^{-1}$ ) of  $[\text{Ru}(\kappa^2\text{N},\text{O-Hyp})(\eta^6\text{-}p\text{-cymene})]$ , **2c**.

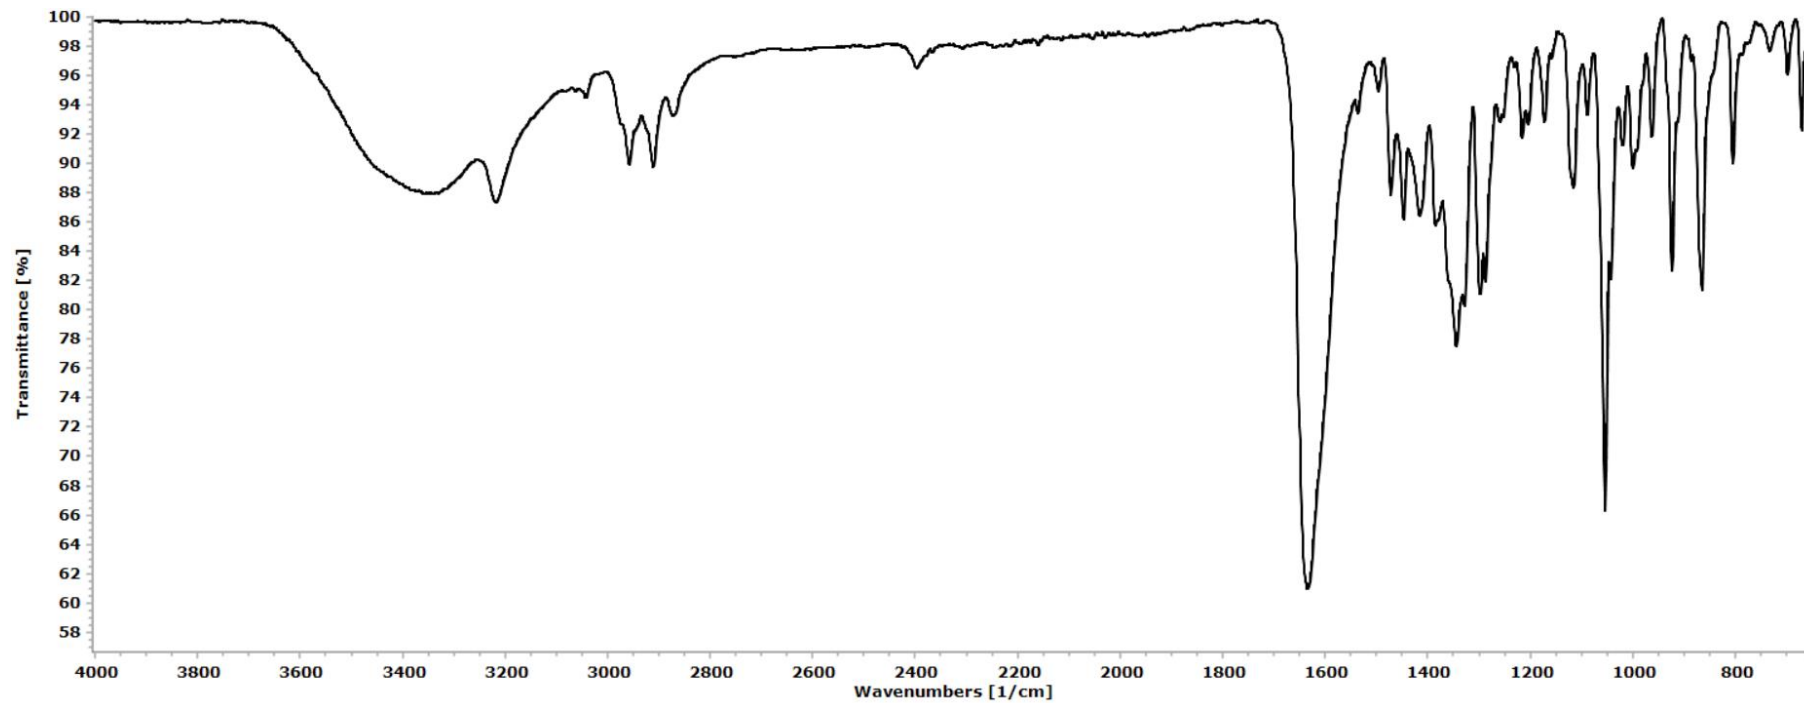

**Figure S13.** Solid-state IR spectrum (650-4000  $\text{cm}^{-1}$ ) of  $[\text{Ru}(\kappa\text{N-NCS})(\kappa^2\text{N,O-Hyp})(\eta^6\text{-}p\text{-cymene})]$ , **2d**.

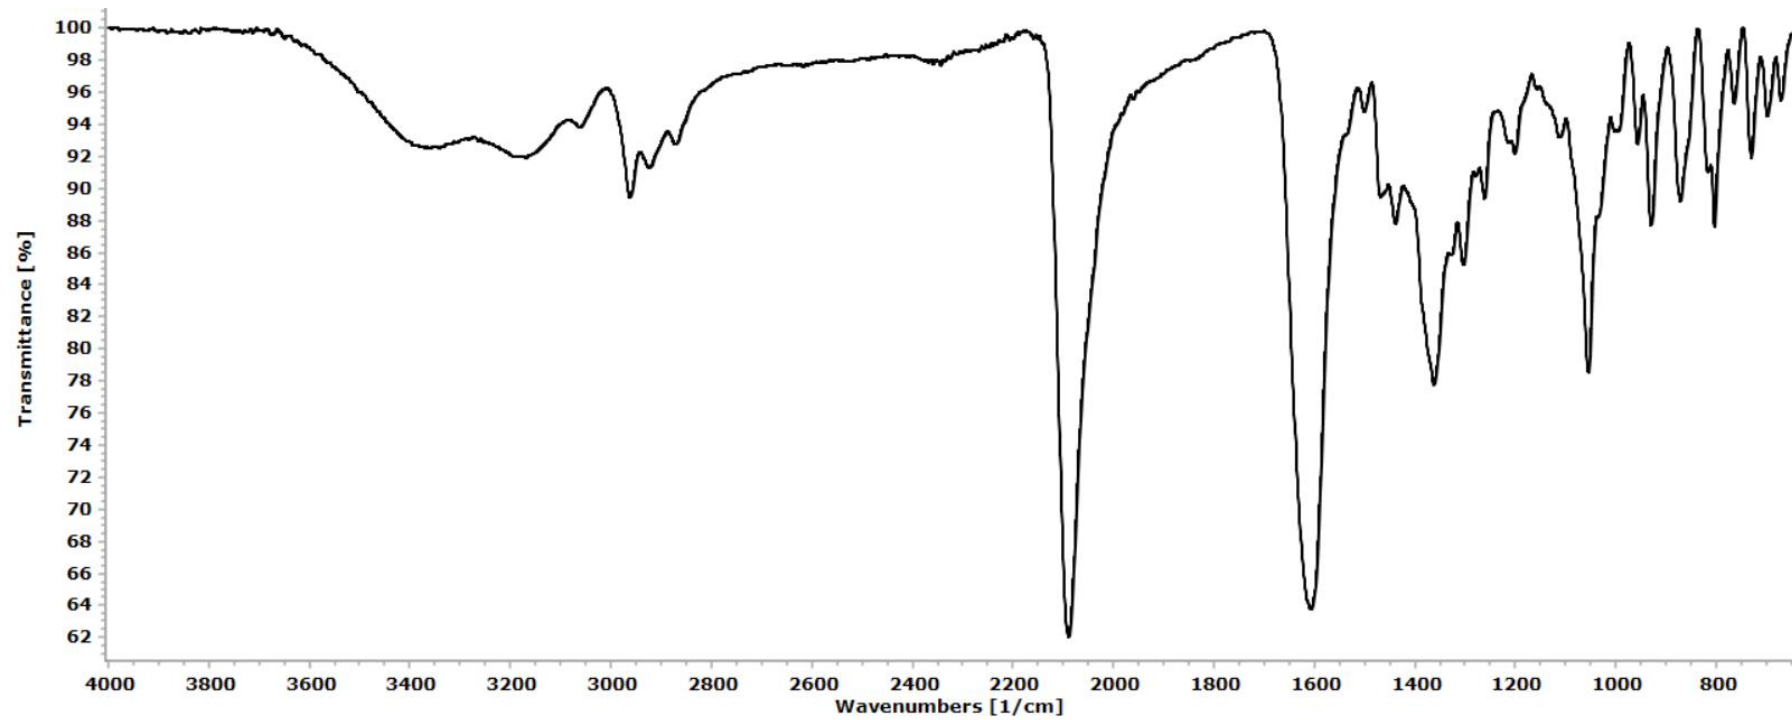

Figure S14. Solid-state IR spectrum (650-4000  $\text{cm}^{-1}$ ) of  $[\text{Ru}(\text{N}_3)(\kappa^2\text{N},\text{O-Hyp})(\eta^6\text{-}p\text{-cymene})]$ , **2e**.

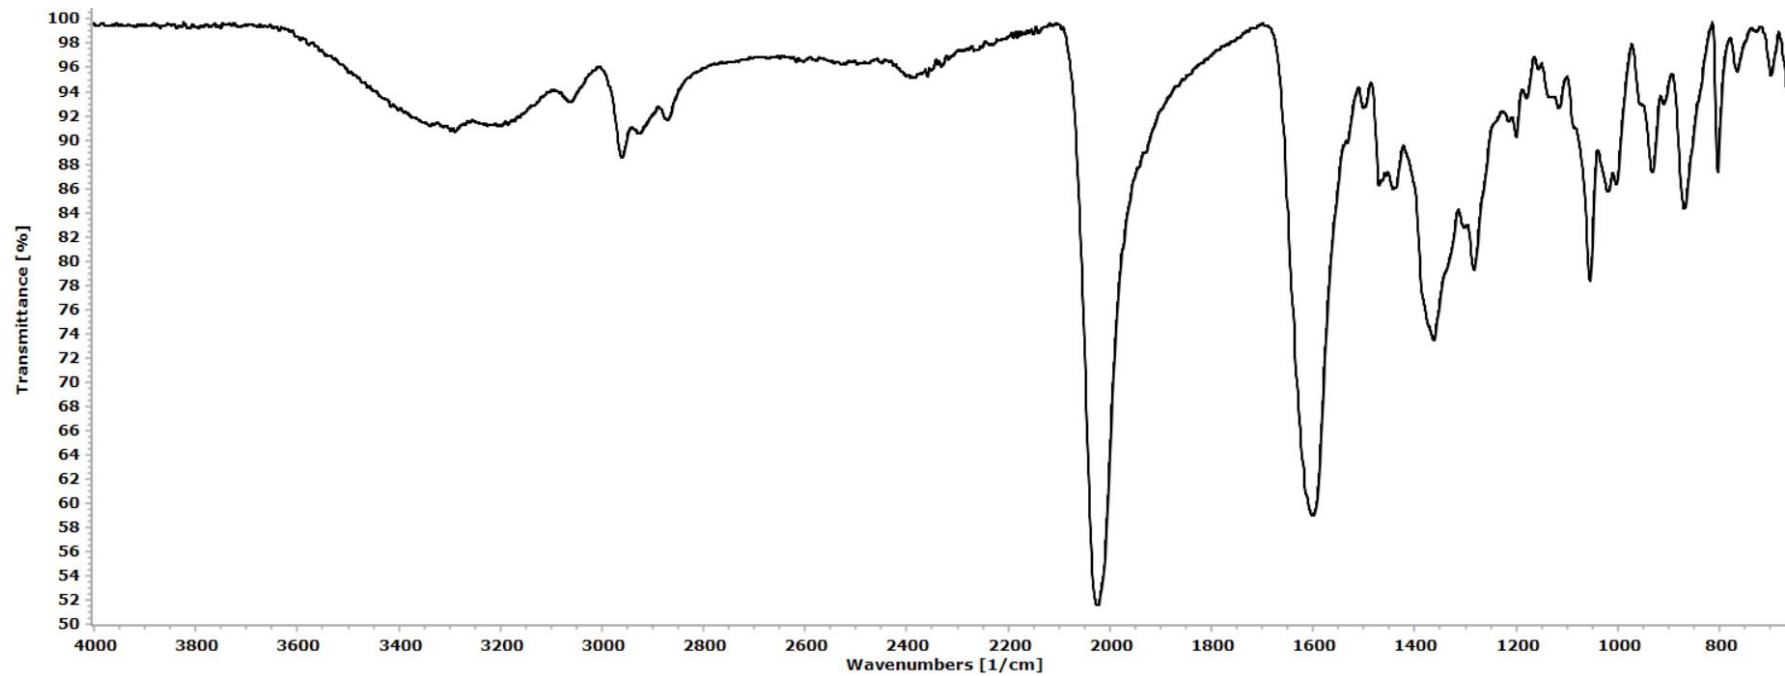

Figure S15. Solid-state IR spectrum (650-4000  $\text{cm}^{-1}$ ) of  $[\text{Ru}(\kappa^3\text{N}, \text{O}, \text{O}'\text{-Ser})(\eta^6\text{-}p\text{-cymene})]$ , **3h**.

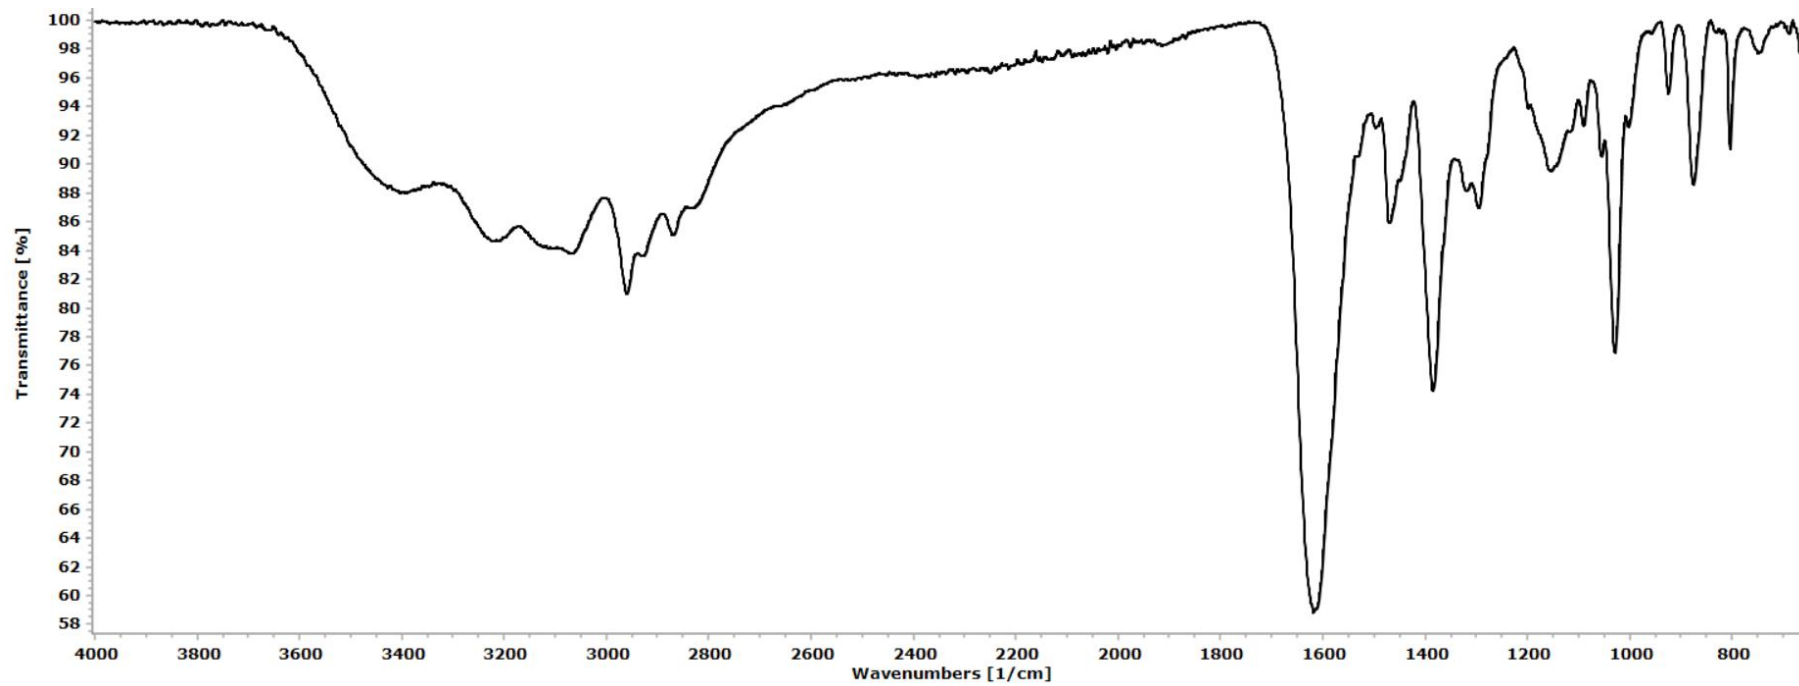

**Figure S16.** Solid-state IR spectrum ( $650\text{-}4000\text{ cm}^{-1}$ ) of  $[\text{Ru}(\kappa^3\text{N},\text{O},\text{O}'\text{-Thr})(\eta^6\text{-}p\text{-cymene})]$ , **4h**.

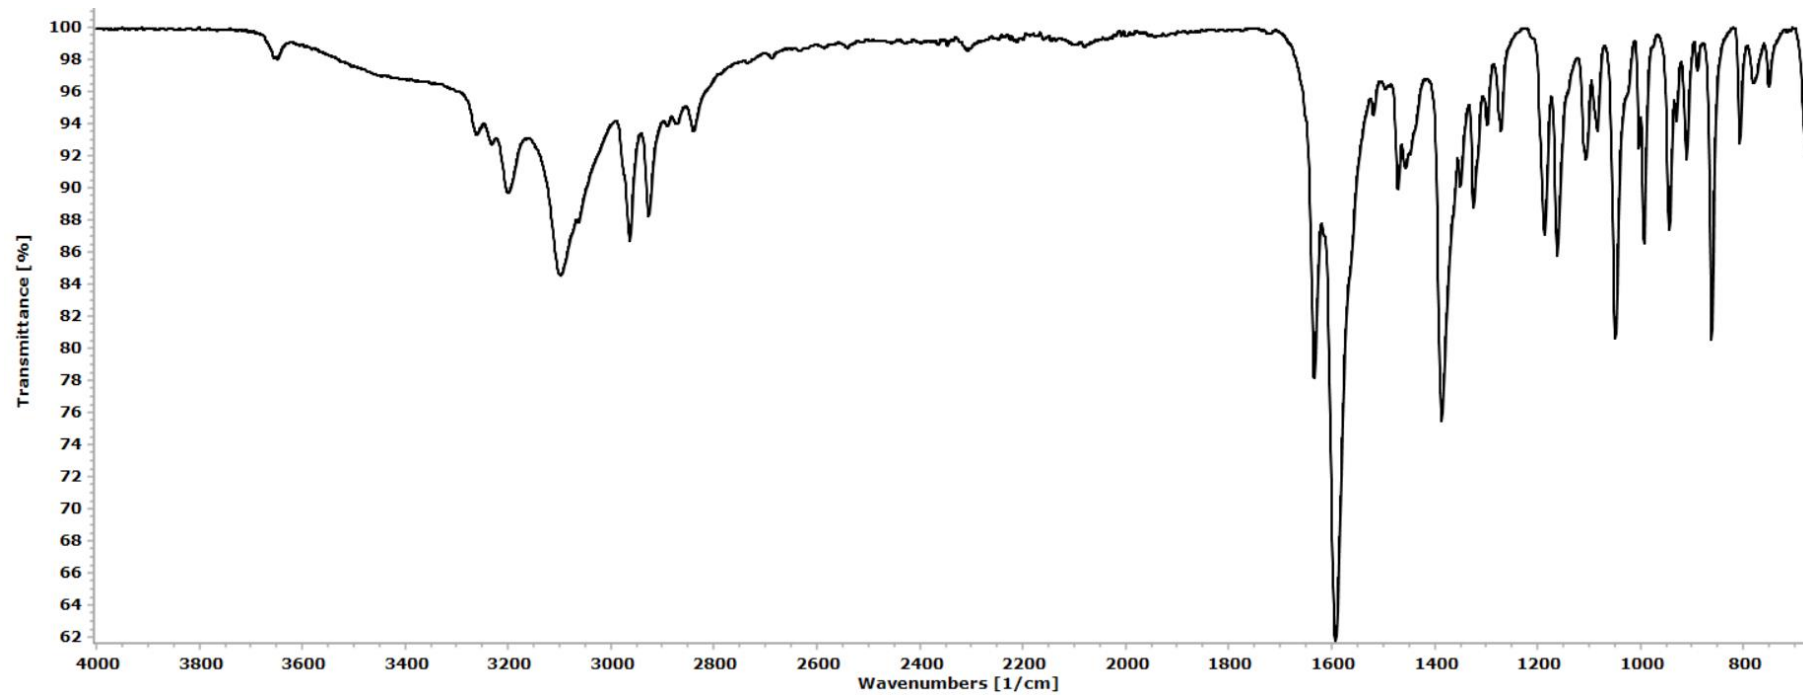

Figure S17. Solid-state IR spectrum (650-4000  $\text{cm}^{-1}$ ) of  $[\text{Ru}(\kappa^3\text{N},\text{O},\text{O}'\text{-Hom})(\eta^6\text{-}p\text{-cymene})]$ , **5h**.

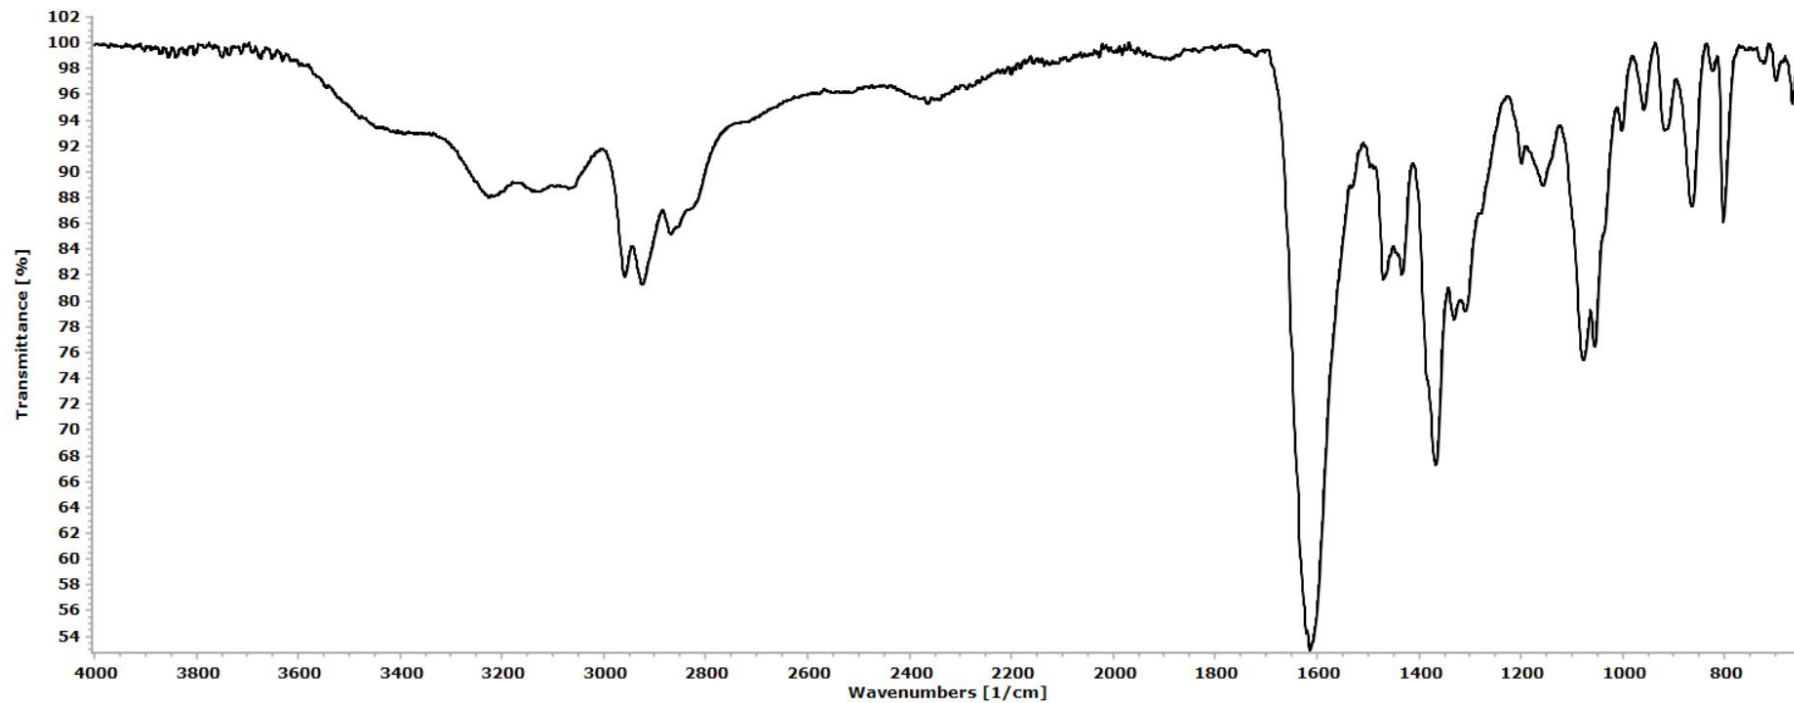

**Figure S18.** Solid-state IR spectrum (650-4000  $\text{cm}^{-1}$ ) of  $[\text{Ru}(\kappa^2\text{N},\text{O-Ser})(\kappa\text{P-pta})(\eta^6\text{-}p\text{-cymene})]\text{Cl}$ ,  $[\mathbf{3i}]\text{Cl}$ .

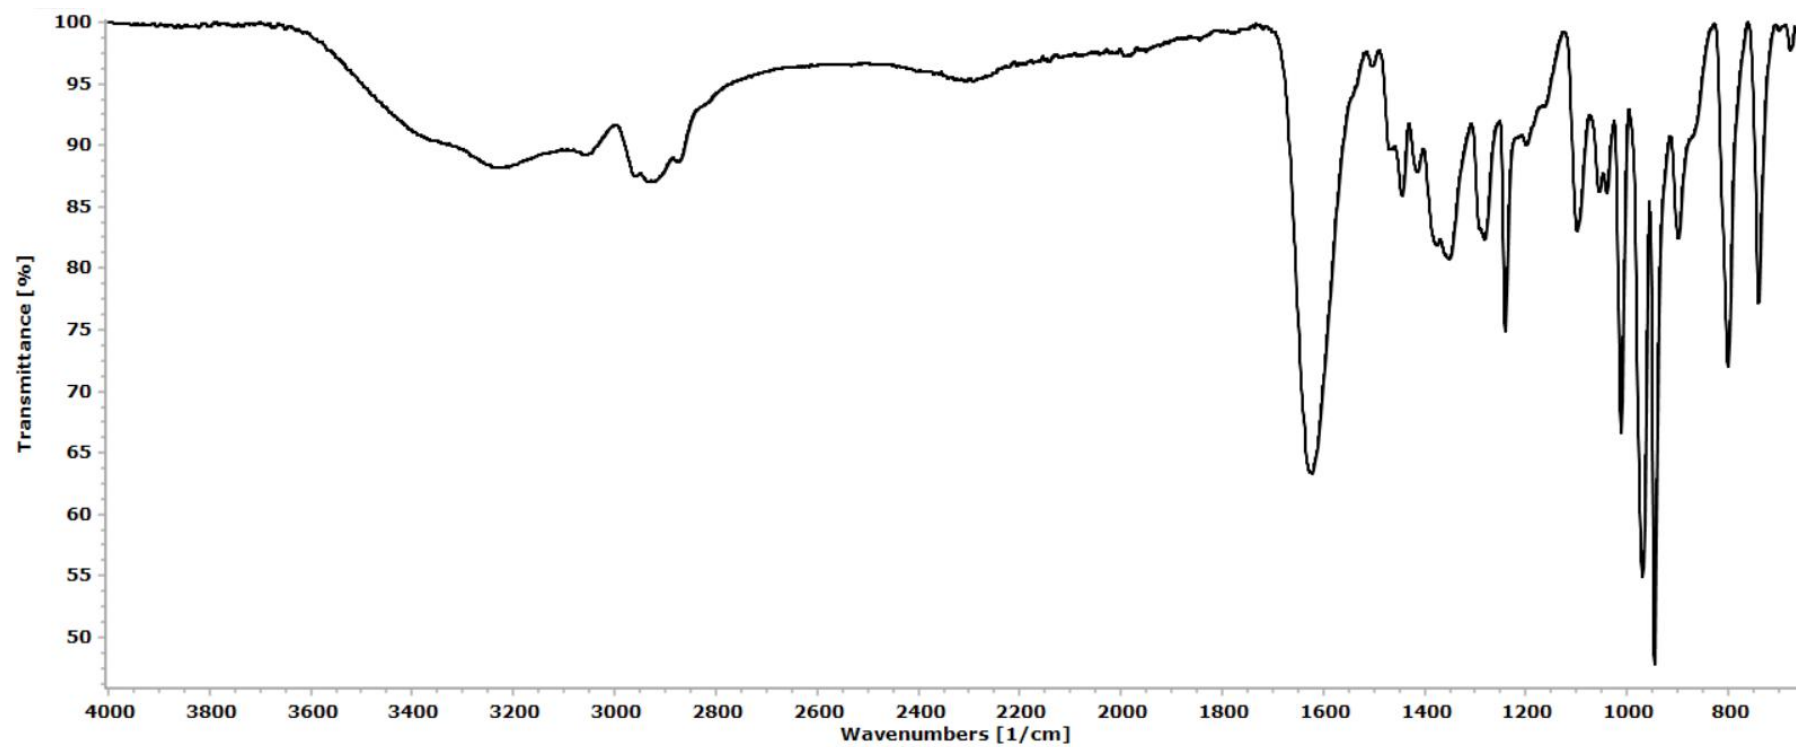

Figure S19.  $^1\text{H}$  NMR spectrum (401 MHz,  $\text{CDCl}_3$ ) of  $[\text{RuBr}_2(\eta^6\text{-}p\text{-cymene})]_2$ .

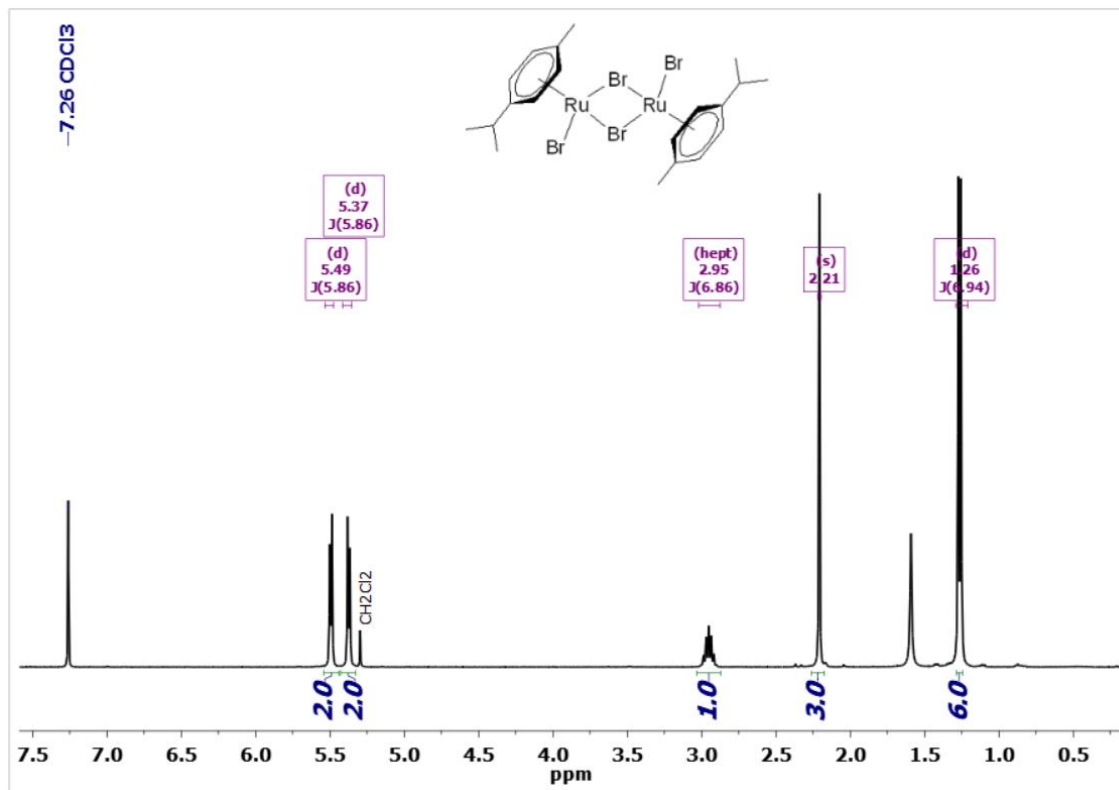

Figure S20.  $^1\text{H}$  NMR spectrum (401 MHz,  $\text{CDCl}_3$ ) of  $[\text{RuI}_2(\eta^6\text{-}p\text{-cymene})]_2$ .

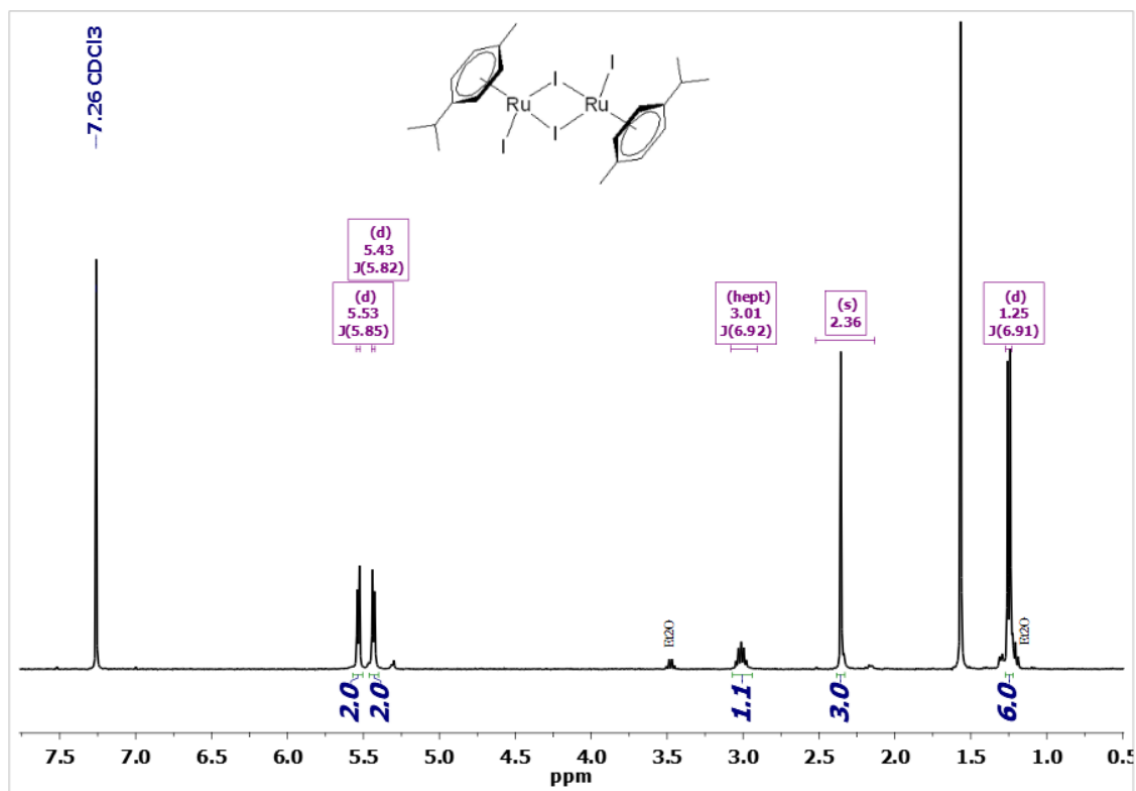

Figure S21.  $^1\text{H}$  NMR spectrum (401 MHz,  $\text{acetone-d}_6$ ) of  $[\text{Ru}(\text{SCN})_2(\eta^6\text{-}p\text{-cymene})]_2$ .



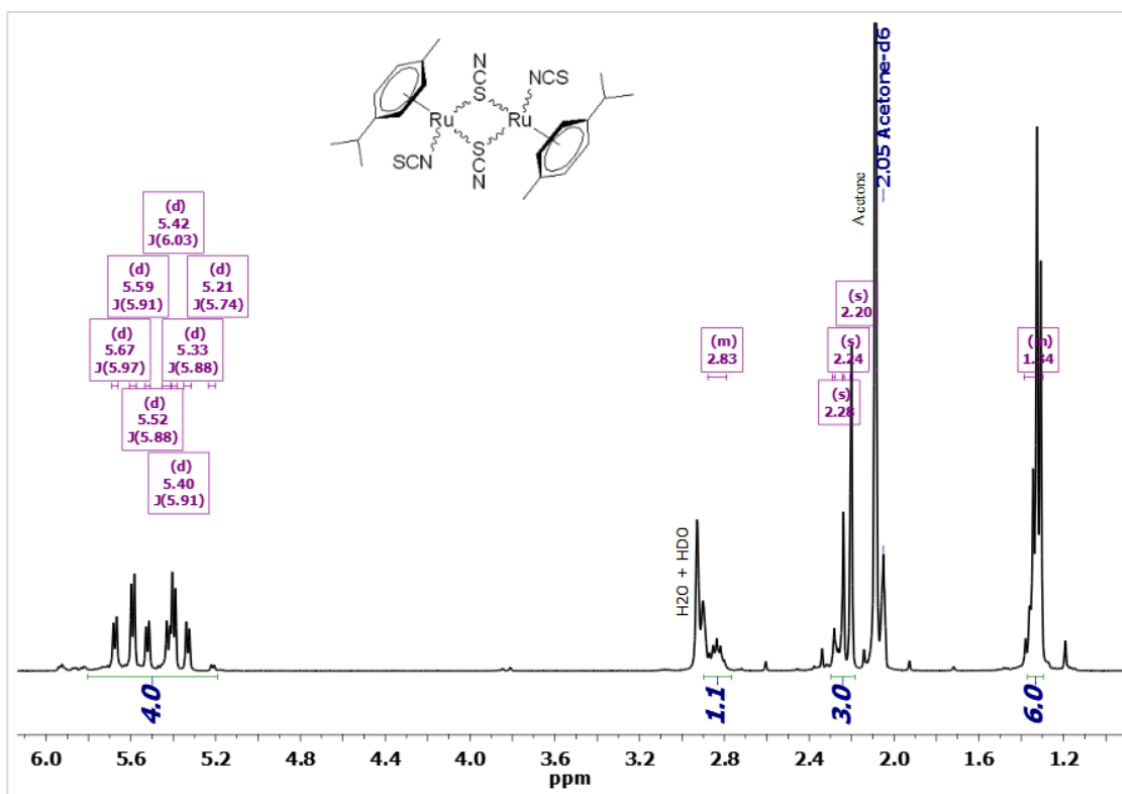

**Figure S22.**  $^{13}\text{C}\{^1\text{H}\}$  NMR spectrum (101 MHz, acetone- $d_6$ ) of  $[\text{Ru}(\text{SCN})_2(\eta^6\text{-}p\text{-cymene})]_2$ .

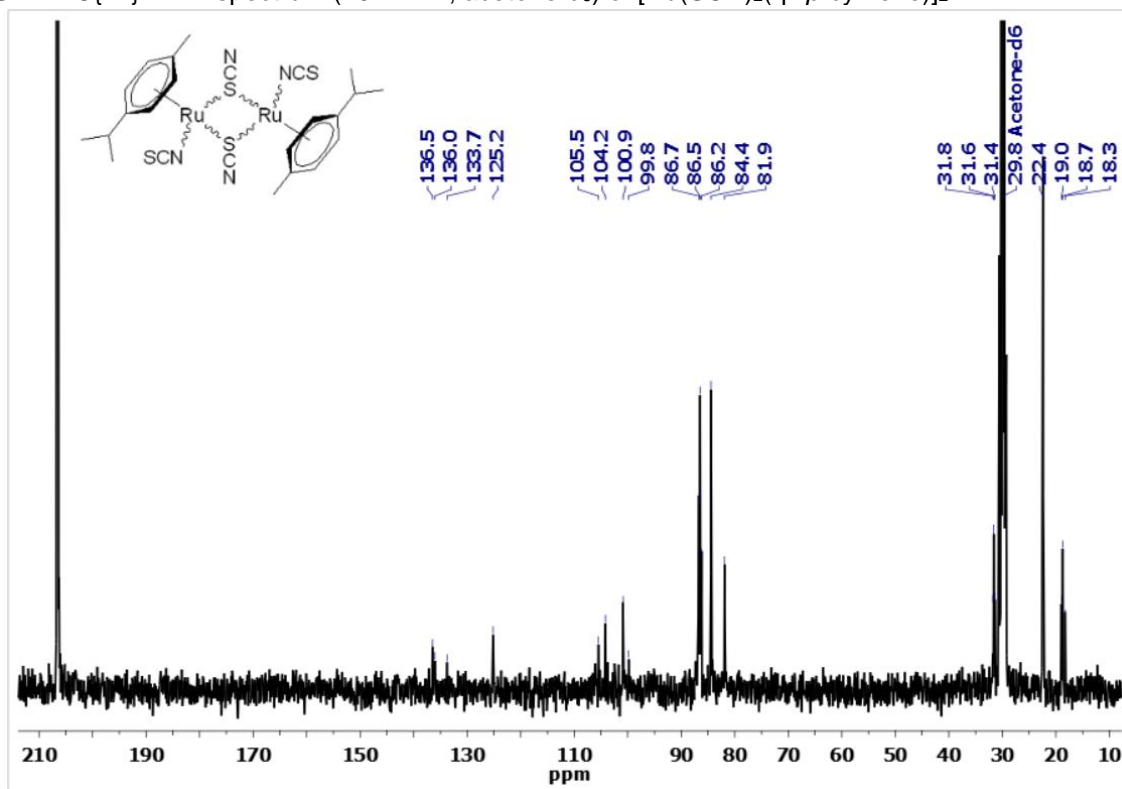

**Figure S23.**  $^1\text{H}$  NMR spectrum (401 MHz,  $\text{CDCl}_3$ ) of  $[\text{Ru}(\text{N}_3)_2(\eta^6\text{-}p\text{-cymene})]_2$ .

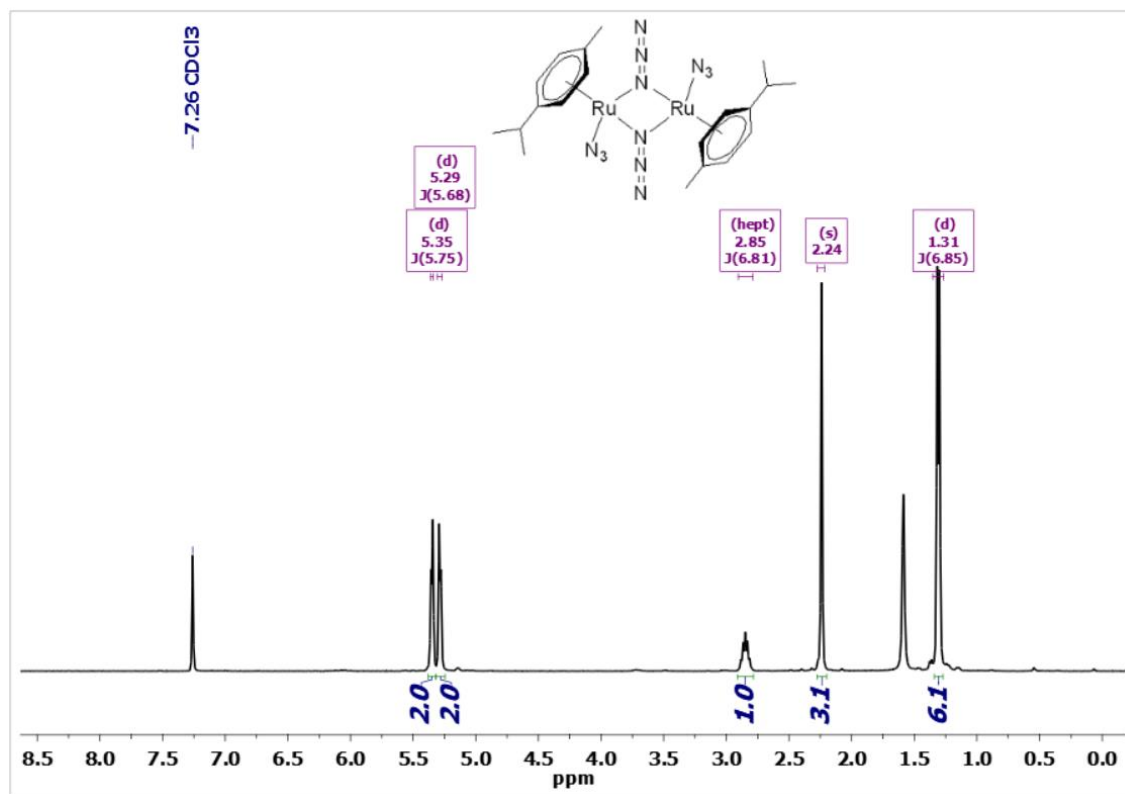

**Figure S24.**  $^1\text{H}$  NMR spectrum (401 MHz,  $\text{CD}_3\text{OD}$ ) of  $[\text{RuBr}(\kappa^2\text{N},\text{O-Pro})(\eta^6\text{-}p\text{-cymene})]$ , **1b**. Only resonances due to the major isomer are marked.

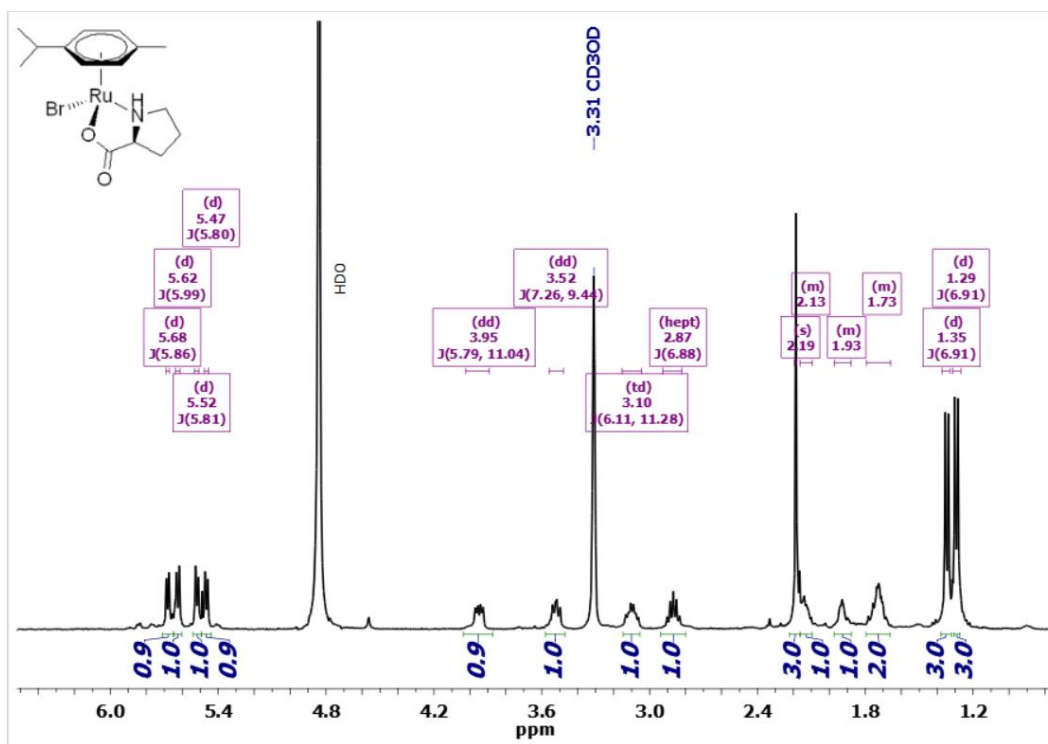

**Figure S25.**  $^{13}\text{C}\{^1\text{H}\}$  NMR spectrum (101 MHz,  $\text{CD}_3\text{OD}$ ) of  $[\text{RuBr}(\kappa^2\text{N}, \text{O-Pro})(\eta^6\text{-}p\text{-cymene})]$ , **1b**.

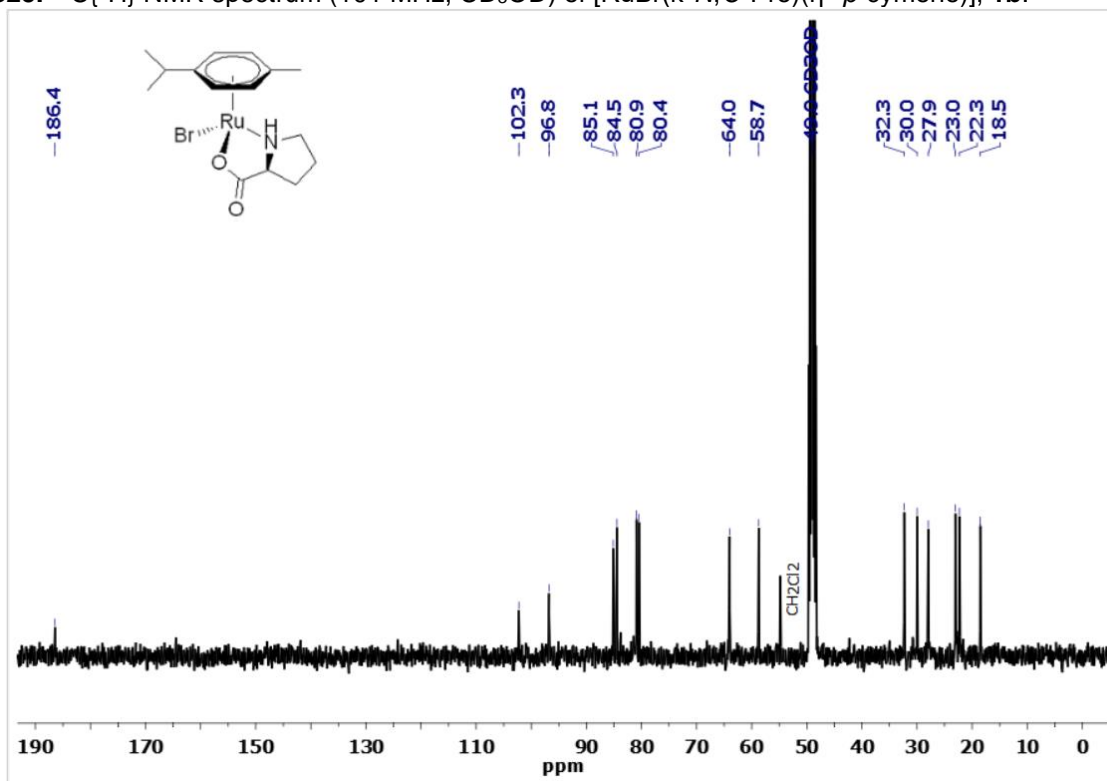

**Figure S26.**  $^1\text{H}$  NMR spectrum (401 MHz,  $\text{CD}_3\text{OD}$ ) of  $[\text{RuI}(\kappa^2\text{N}, \text{O-Pro})(\eta^6\text{-}p\text{-cymene})]$ , **1c**. Only resonances due to the major isomer are marked.

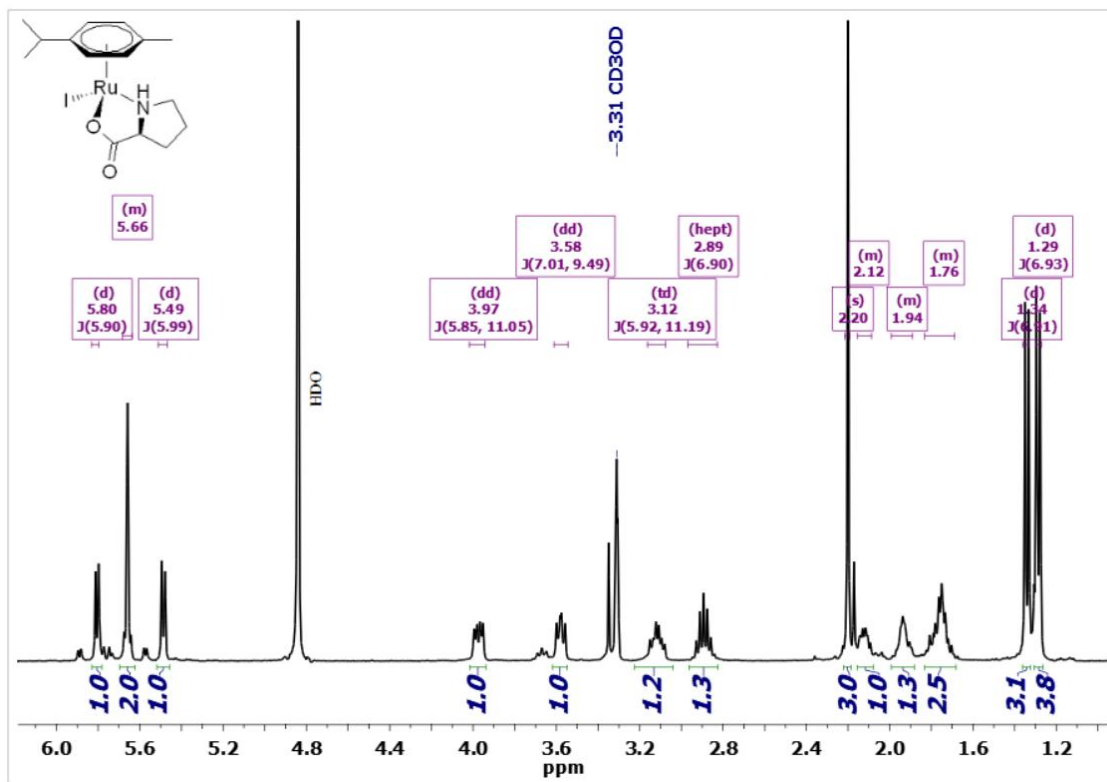

Figure S27.  $^{13}\text{C}\{^1\text{H}\}$  NMR spectrum (101 MHz,  $\text{CD}_3\text{OD}$ ) of  $[\text{Ru}(\kappa^2\text{N},\text{O-Pro})(\eta^6\text{-}p\text{-cymene})]$ , **1c**.

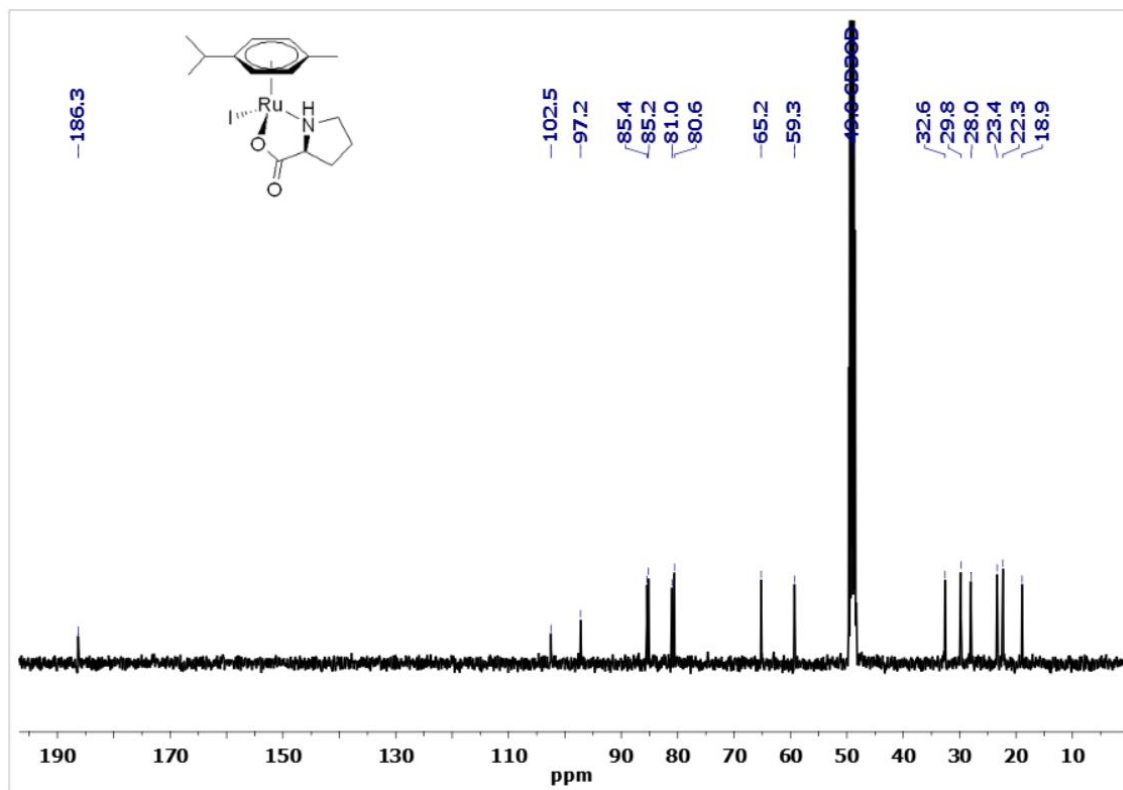

Figure S28.  $^1\text{H}$  NMR spectrum (401 MHz,  $\text{CD}_3\text{OD}$ ) of  $[\text{Ru}(\kappa\text{N-NCS})(\kappa^2\text{N},\text{O-Pro})(\eta^6\text{-}p\text{-cymene})]$ , **1d**.

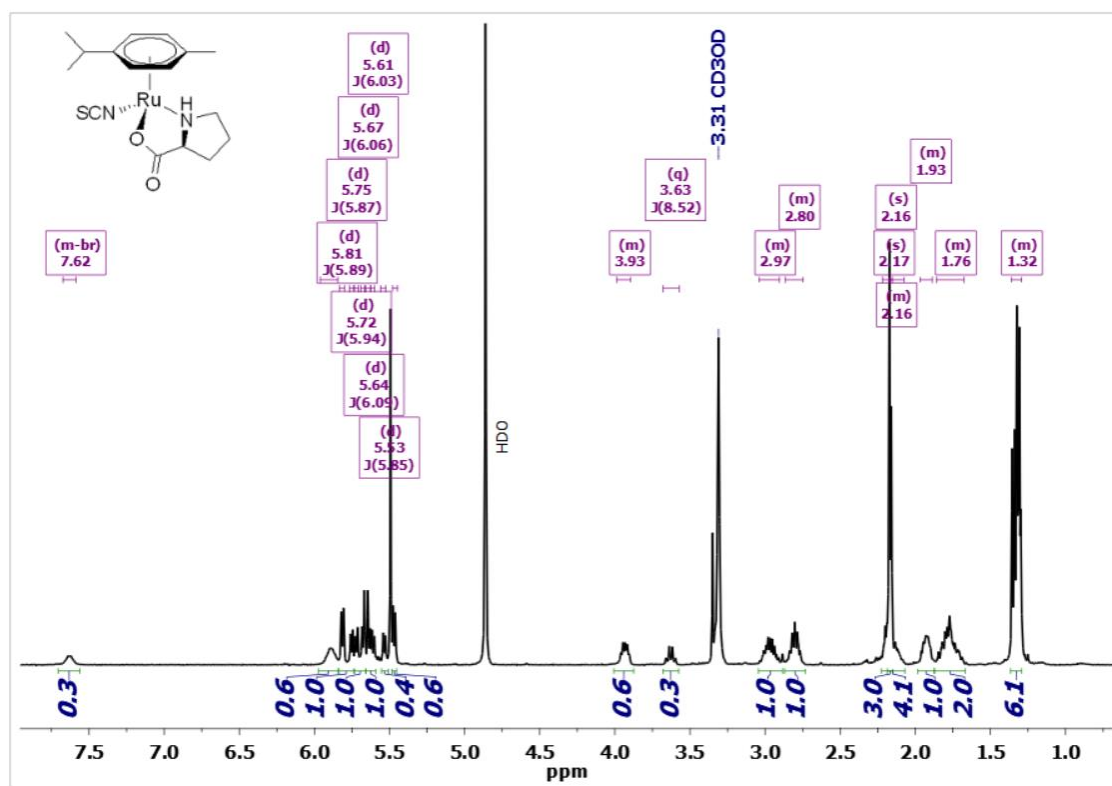

**Figure S29.**  $^{13}\text{C}\{^1\text{H}\}$  NMR spectrum (101 MHz,  $\text{CD}_3\text{OD}$ ) of  $[\text{Ru}(\kappa\text{N-NCS})(\kappa^2\text{N},\text{O-Pro})(\eta^6\text{-}p\text{-cymene})]$ , **1d**.

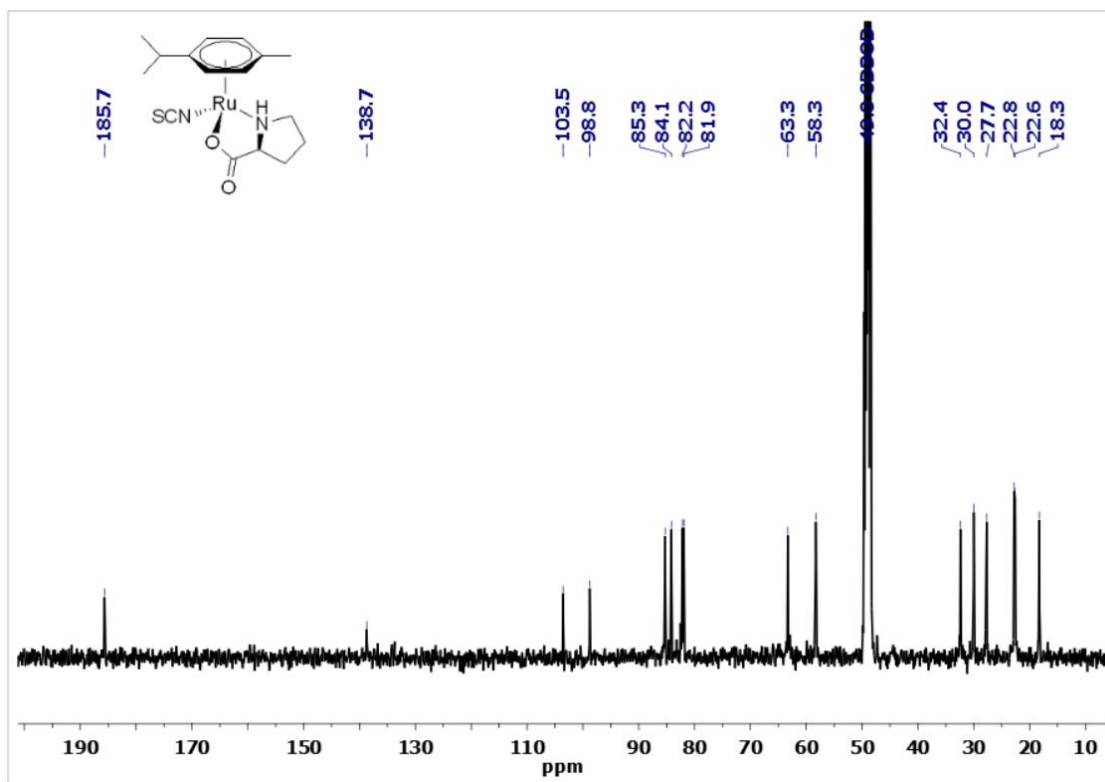

**Figure S30.**  $^1\text{H}$  NMR spectrum (401 MHz,  $\text{CD}_3\text{OD}$ ) of  $[\text{Ru}(\text{N}_3)(\kappa^2\text{N},\text{O-Pro})(\eta^6\text{-}p\text{-cymene})]$ , **1e**.

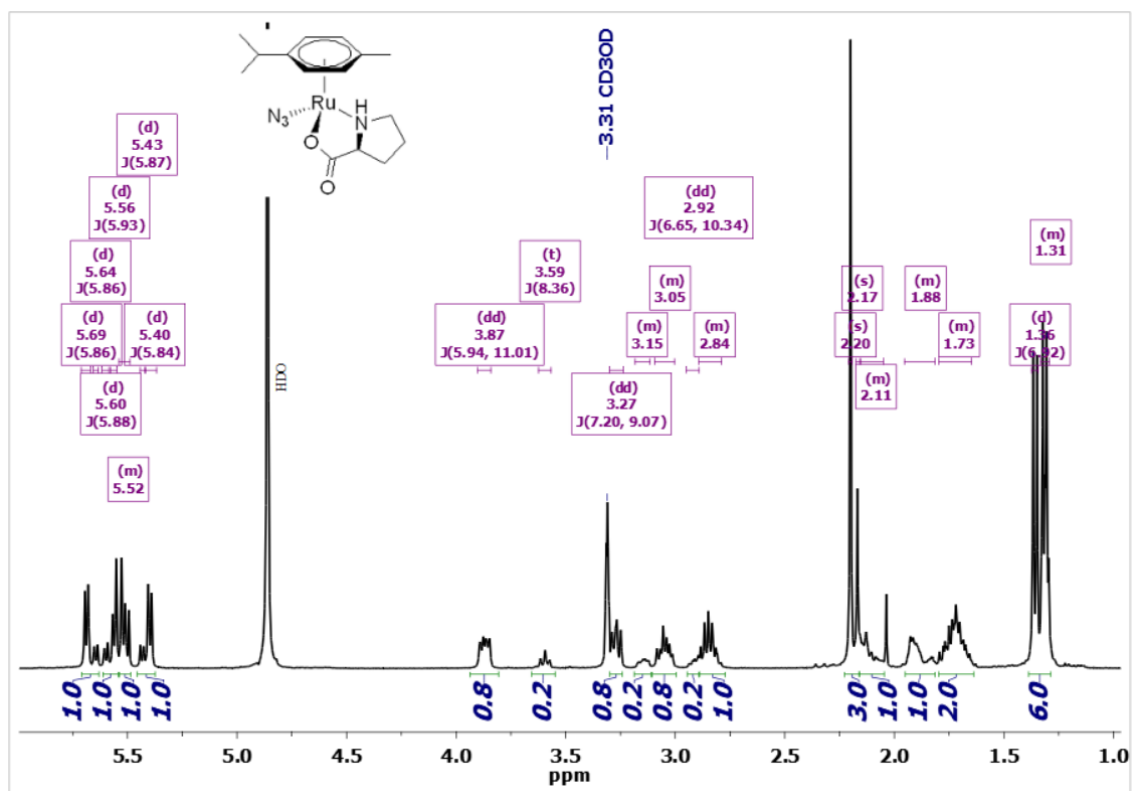

**Figure S31.**  $^{13}\text{C}\{^1\text{H}\}$  NMR spectrum (101 MHz,  $\text{CD}_3\text{OD}$ ) of  $[\text{Ru}(\text{N}_3)(\kappa^2\text{N},\text{O-Pro})(\eta^6\text{-}p\text{-cymene})]$ , **1e**.

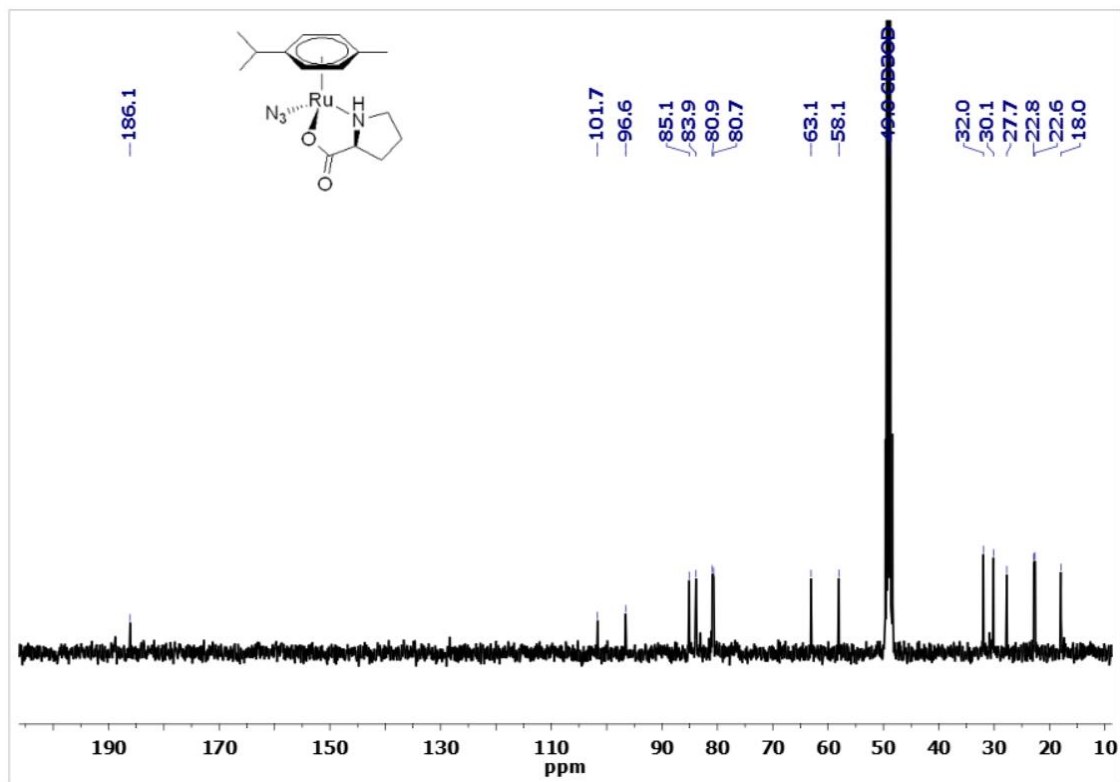

**Figure S32.**  $^1\text{H}$  NMR spectrum (401 MHz,  $\text{CD}_3\text{OD}$ ) of  $[\text{Ru}(\kappa\text{-N-NO}_2)(\kappa^2\text{N},\text{O-Pro})(\eta^6\text{-}p\text{-cymene})]$ , **1f**. Only resonances due to the major isomer are marked.

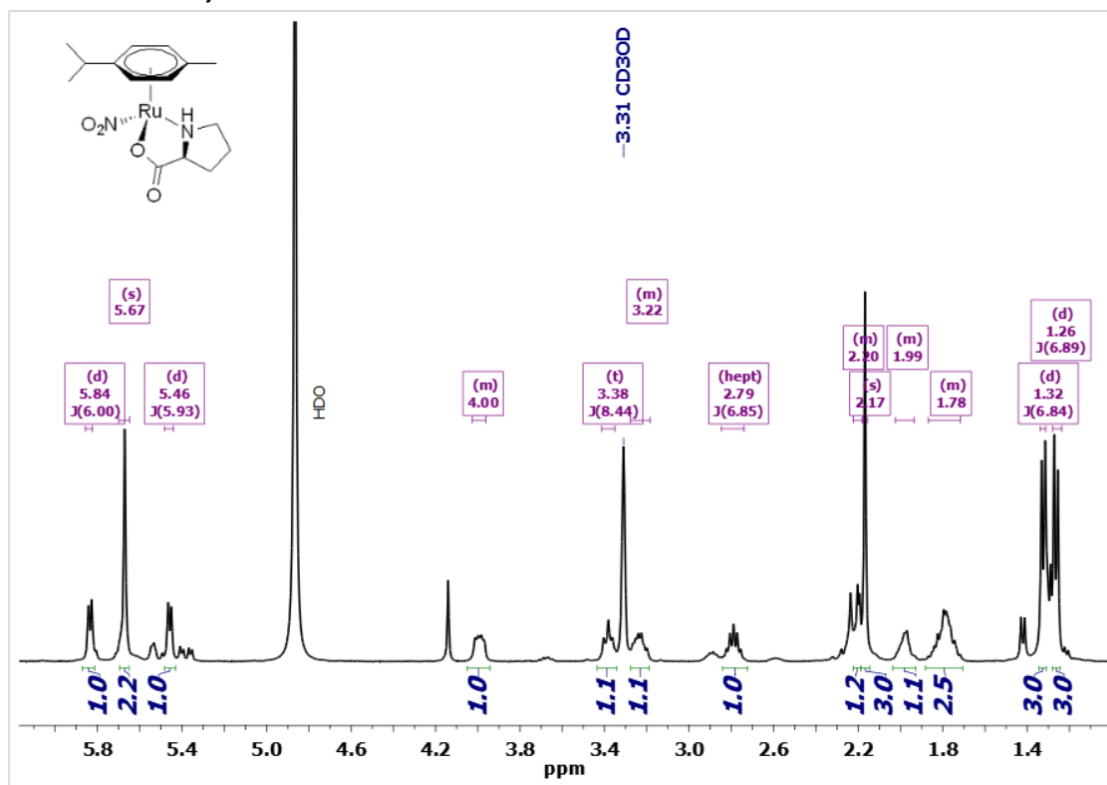

**Figure S33.**  $^{13}\text{C}\{^1\text{H}\}$  NMR spectrum (101 MHz,  $\text{CD}_3\text{OD}$ ) of  $[\text{Ru}(\kappa\text{N}-\text{NO}_2)(\kappa^2\text{N},\text{O}-\text{Pro})(\eta^6-p\text{-cymene})]$ , **1f**.

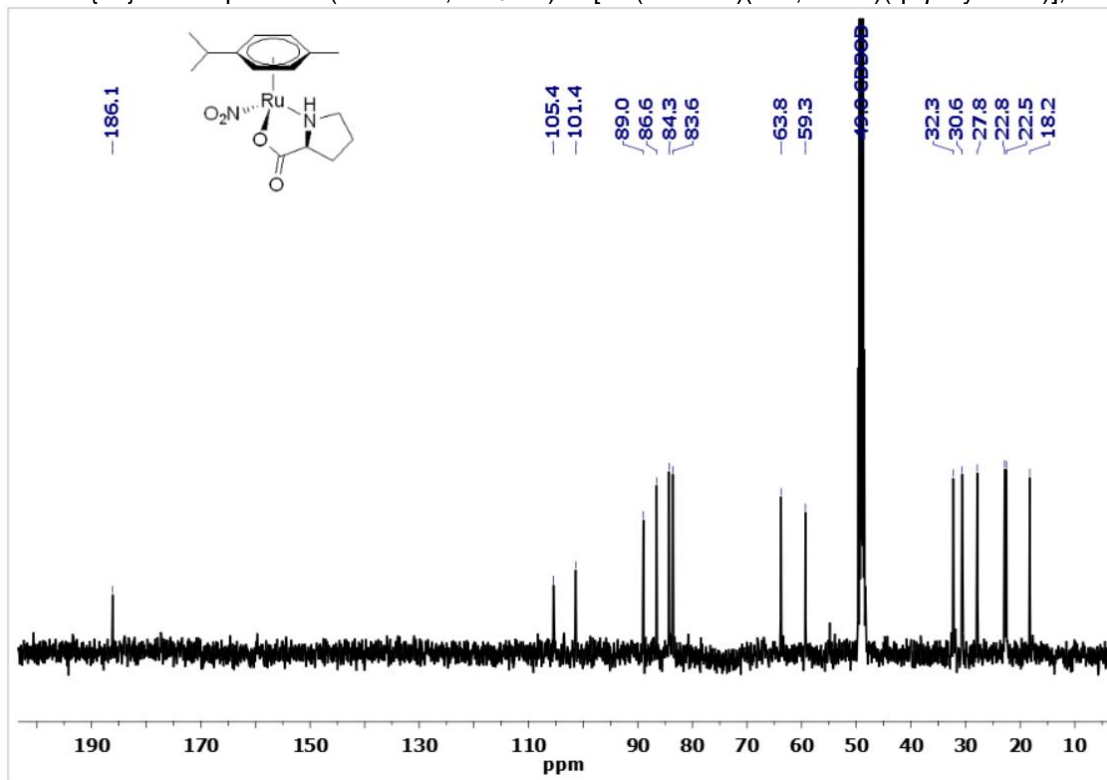

**Figure S34.**  $^1\text{H}$  NMR spectrum (401 MHz,  $\text{CD}_3\text{OD}$ ) of  $[\text{Ru}(\text{CN})(\kappa^2\text{N},\text{O}-\text{Pro})(\eta^6-p\text{-cymene})]$ , **1g**. Only resonances due to the major isomer are marked.

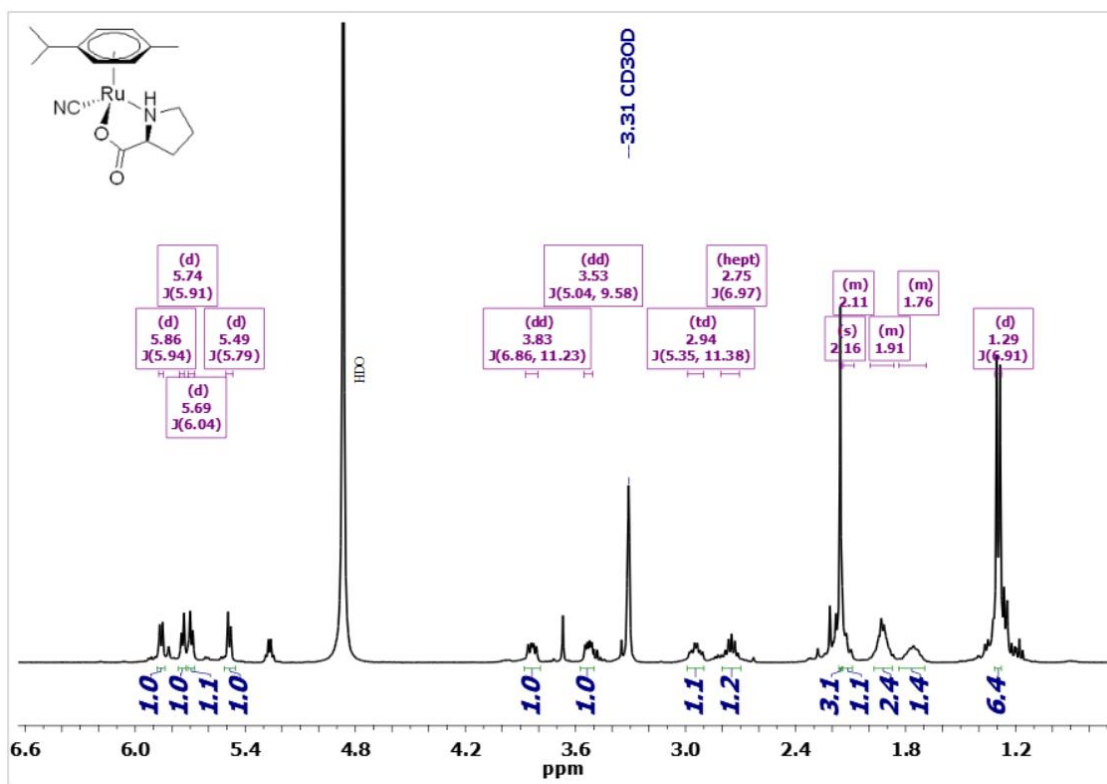

**Figure S35.**  $^{13}\text{C}\{^1\text{H}\}$  NMR spectrum (101 MHz,  $\text{CD}_3\text{OD}$ ) of  $[\text{Ru}(\text{CN})(\kappa^2\text{N},\text{O-Pro})(\eta^6\text{-}p\text{-cymene})]$ , **1g**.

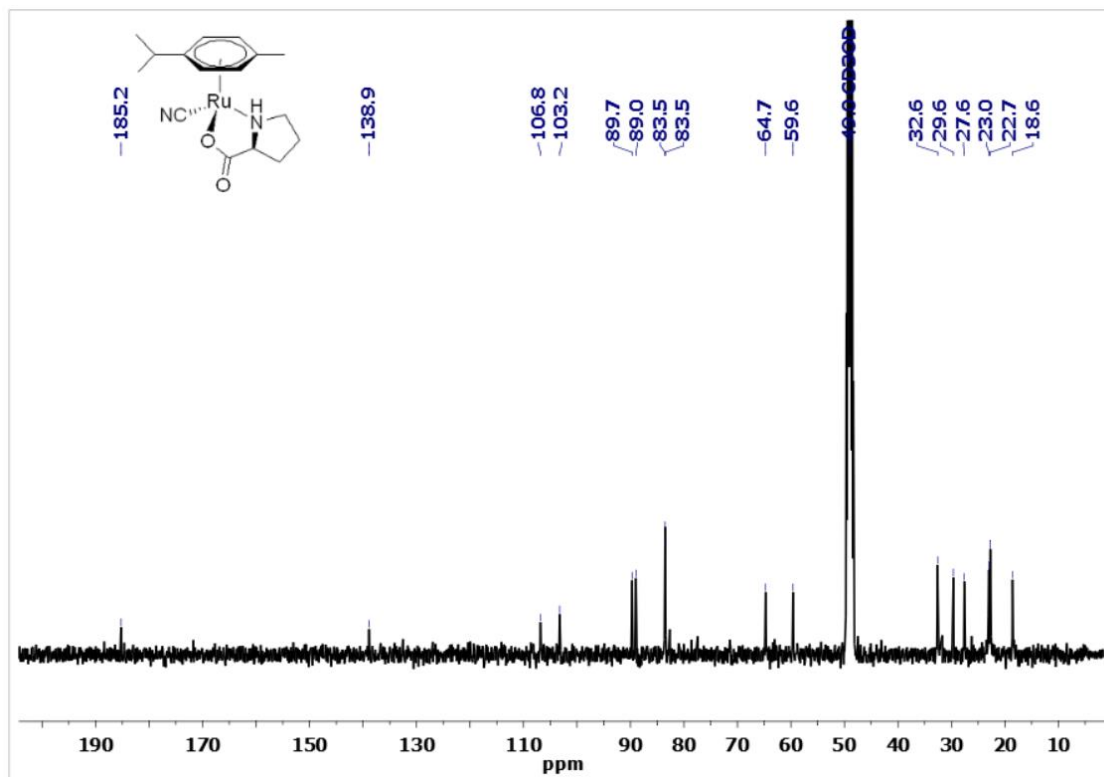

**Figure S36.**  $^1\text{H}$  NMR spectrum (401 MHz,  $\text{CD}_3\text{OD}$ ) of  $[\text{RuBr}(\kappa^2\text{N},\text{O-Hyp})(\eta^6\text{-}p\text{-cymene})]$ , **2b**. Only resonances due to the major isomer are marked.

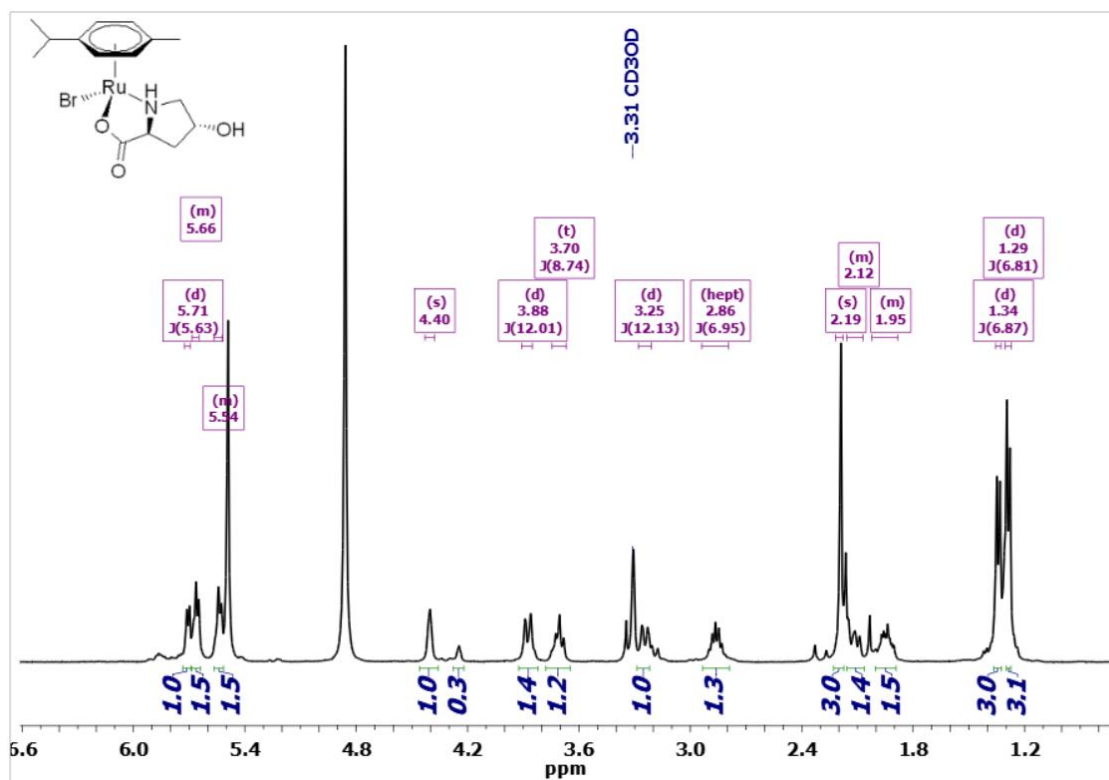



**Figure S37.**  $^{13}\text{C}\{^1\text{H}\}$  NMR spectrum (101 MHz,  $\text{CD}_3\text{OD}$ ) of  $[\text{RuBr}(\kappa^2\text{N},\text{O-Hyp})(\eta^6\text{-}p\text{-cymene})]$ , **2b**. Only resonances due to the major isomer are marked.

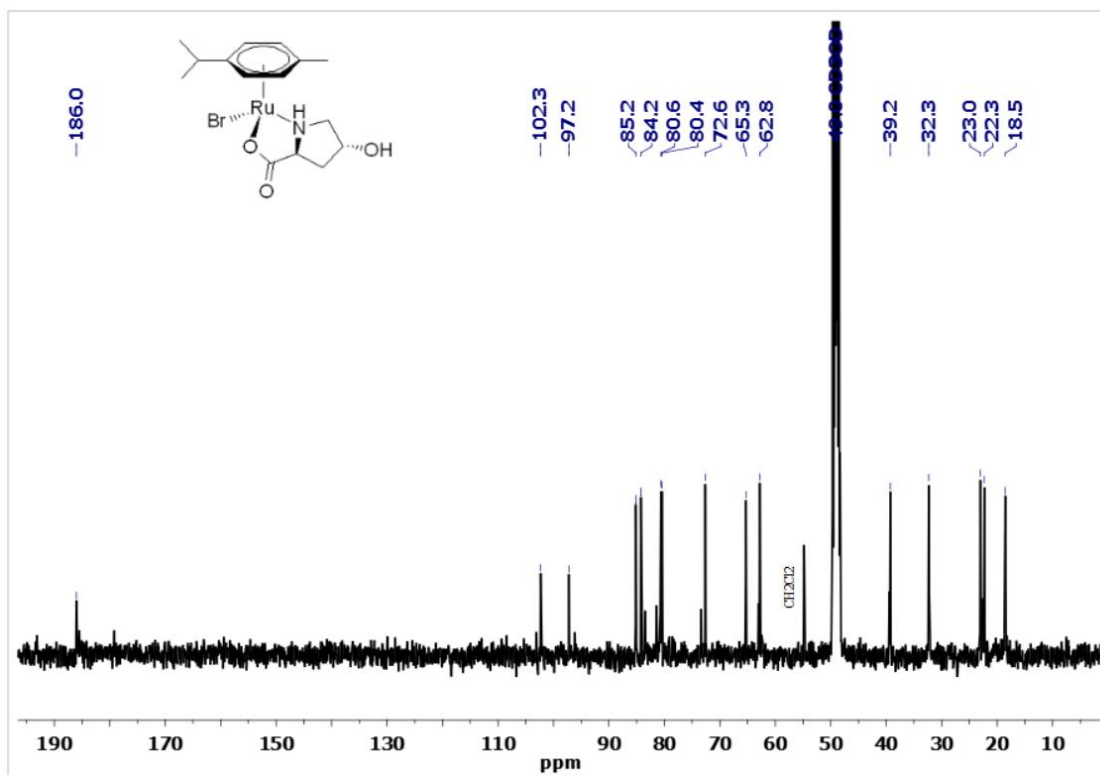

**Figure S38.**  $^1\text{H}$  NMR spectrum (401 MHz,  $\text{CD}_3\text{OD}$ ) of  $[\text{RuI}(\kappa^2\text{N},\text{O-Hyp})(\eta^6\text{-}p\text{-cymene})]$ , **2c**. Only resonances due to the major isomer are marked.

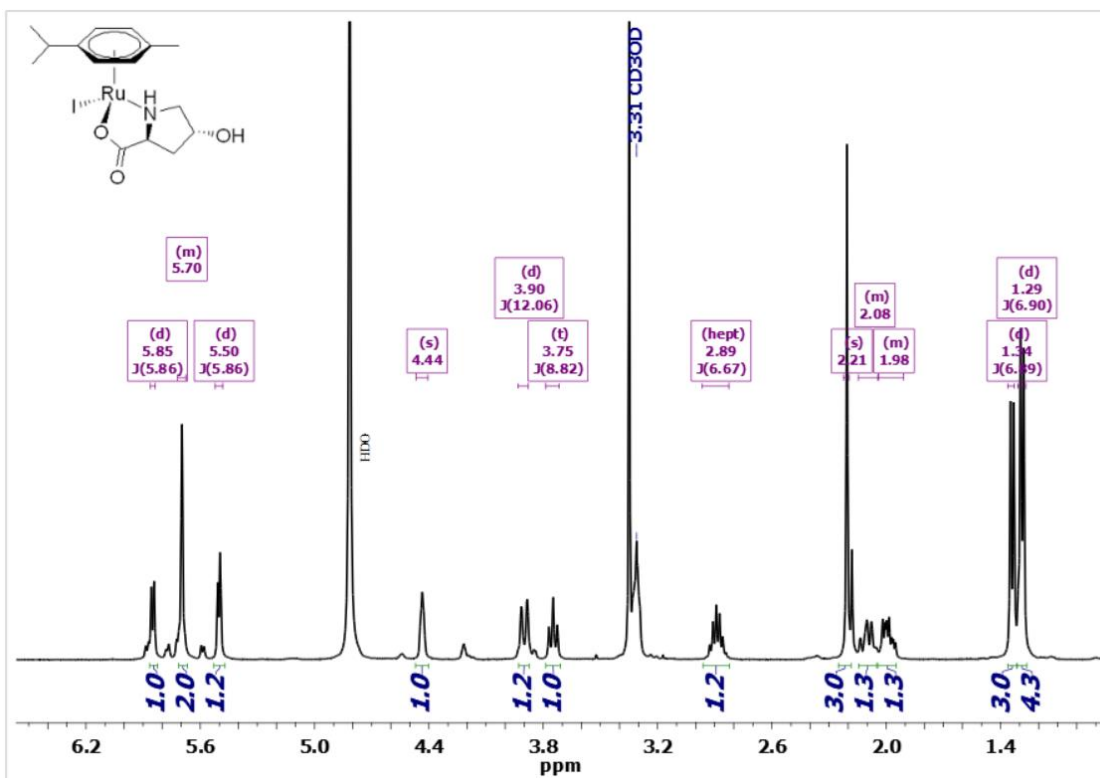

**Figure S39.**  $^{13}\text{C}\{^1\text{H}\}$  NMR spectrum (101 MHz,  $\text{CD}_3\text{OD}$ ) of  $[\text{Ru}(\kappa^2N,O\text{-Hyp})(\eta^6\text{-}p\text{-cymene})]$ , **2c**. Only resonances due to the major isomer are marked.

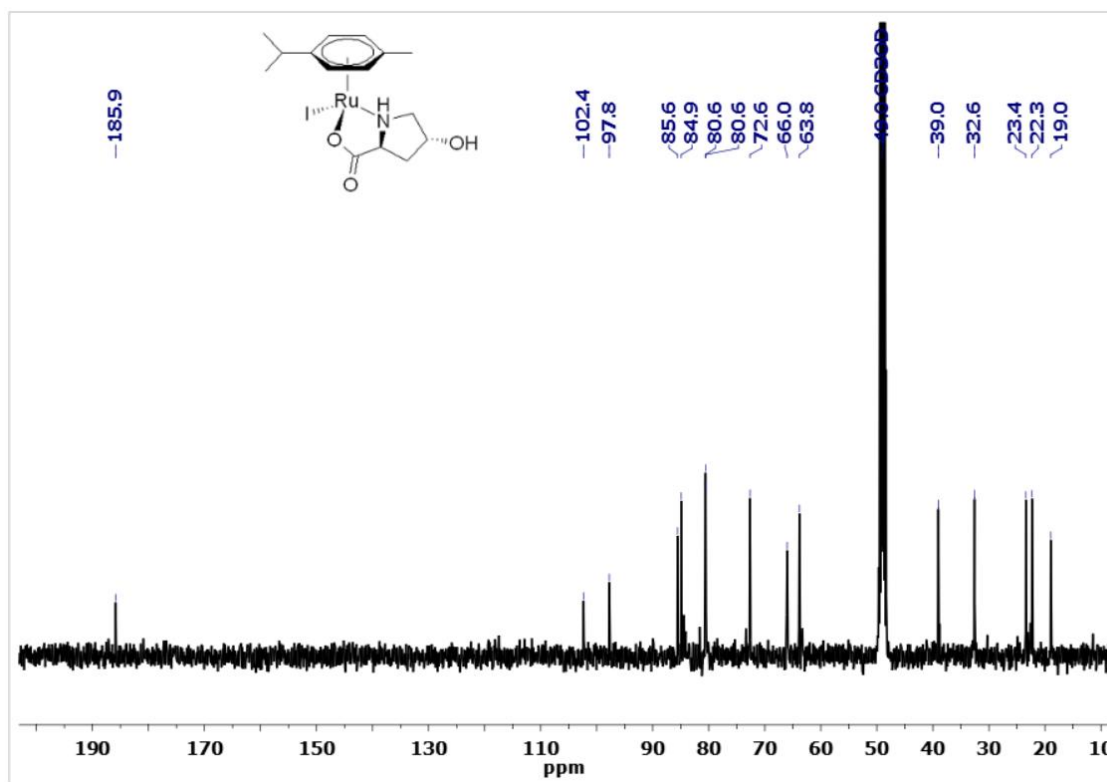

**Figure S40.**  $^1\text{H}$  NMR spectrum (401 MHz,  $\text{CD}_3\text{OD}$ ) of  $[\text{Ru}(\kappa N\text{-NCS})(\kappa^2N,O\text{-Hyp})(\eta^6\text{-}p\text{-cymene})]$ , **2d**.

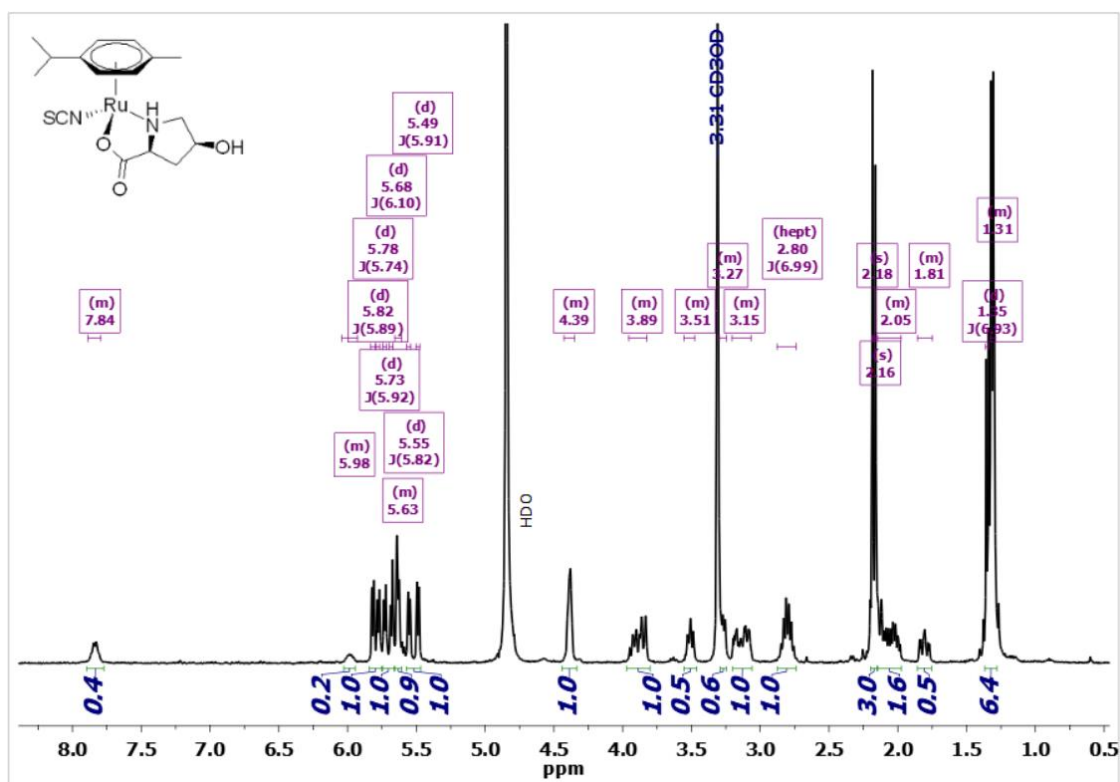

Figure S41.  $^{13}\text{C}\{^1\text{H}\}$  NMR spectrum (101 MHz,  $\text{CD}_3\text{OD}$ ) of  $[\text{Ru}(\kappa\text{N-NCS})(\kappa^2\text{N,O-Hyp})(\eta^6\text{-}p\text{-cymene})]$ , **2d**.

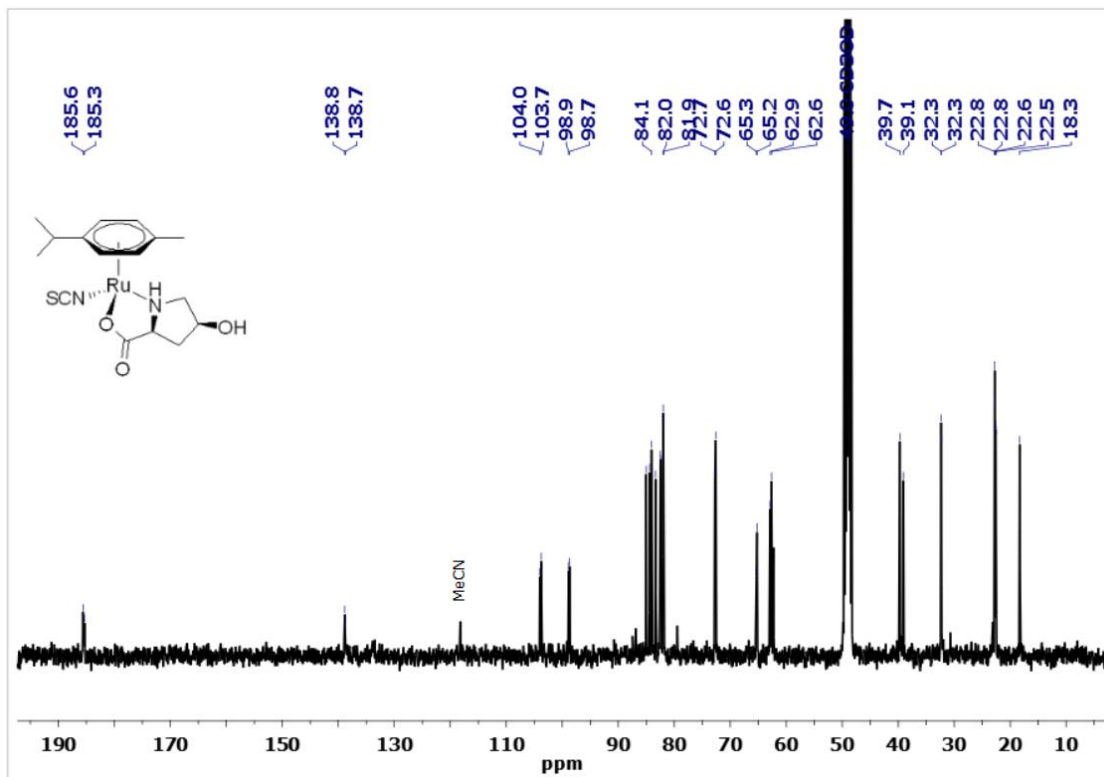

Figure S42.  $^1\text{H}$  NMR spectrum (401 MHz,  $\text{CD}_3\text{OD}$ ) of  $[\text{Ru}(\text{N}_3)(\kappa^2\text{N,O-Hyp})(\eta^6\text{-}p\text{-cymene})]$ , **2e**.

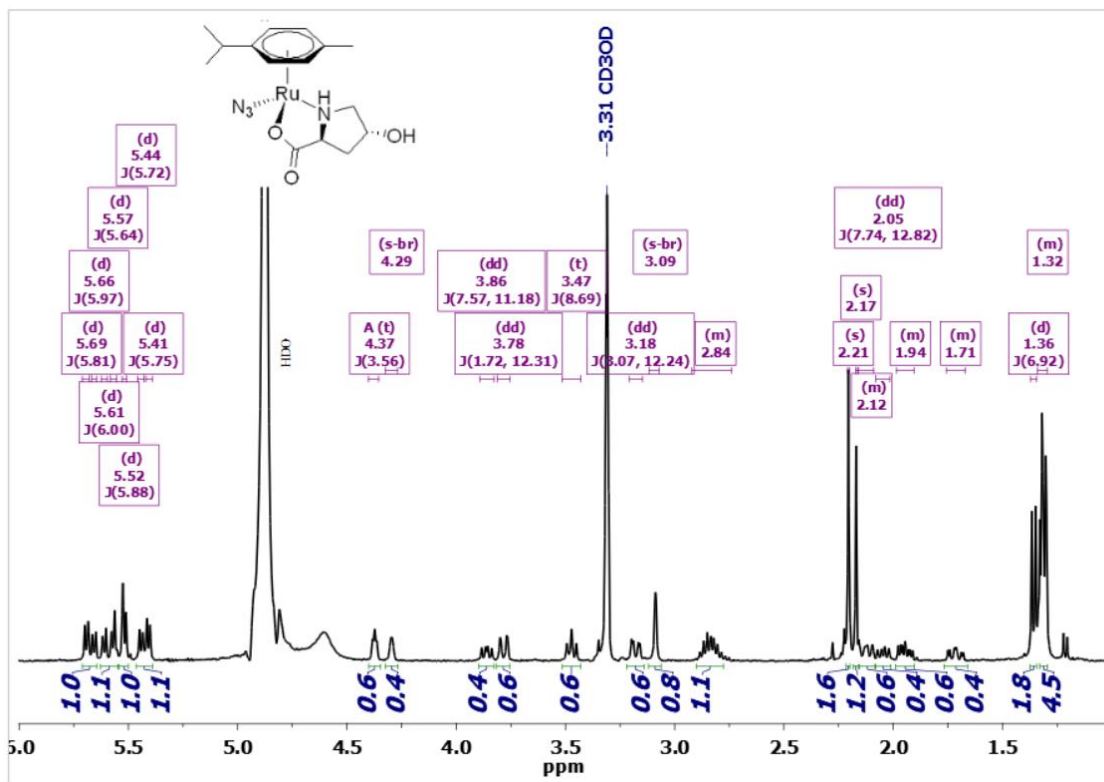

**Figure S43.**  $^{13}\text{C}\{^1\text{H}\}$  NMR spectrum (101 MHz,  $\text{CD}_3\text{OD}$ ) of  $[\text{Ru}(\text{N}_3)(\kappa^2N,O\text{-Hyp})(\eta^6\text{-}p\text{-cymene})]$ , **2e**. Only resonances due to the major isomer are marked.

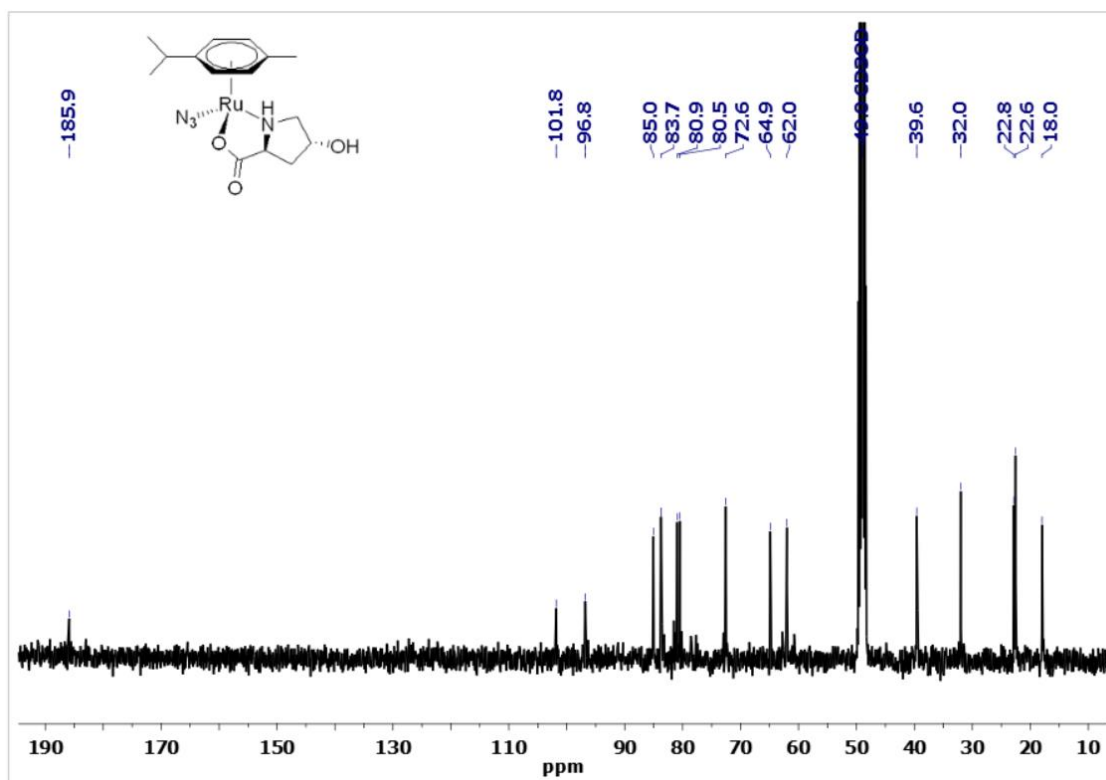

**Figure S44.**  $^1\text{H}$  NMR spectrum (401 MHz,  $\text{CD}_3\text{OD}$ ) of  $[\text{Ru}(\kappa^3N,O,O'\text{-Ser})(\eta^6\text{-}p\text{-cymene})]$ , **3h**.

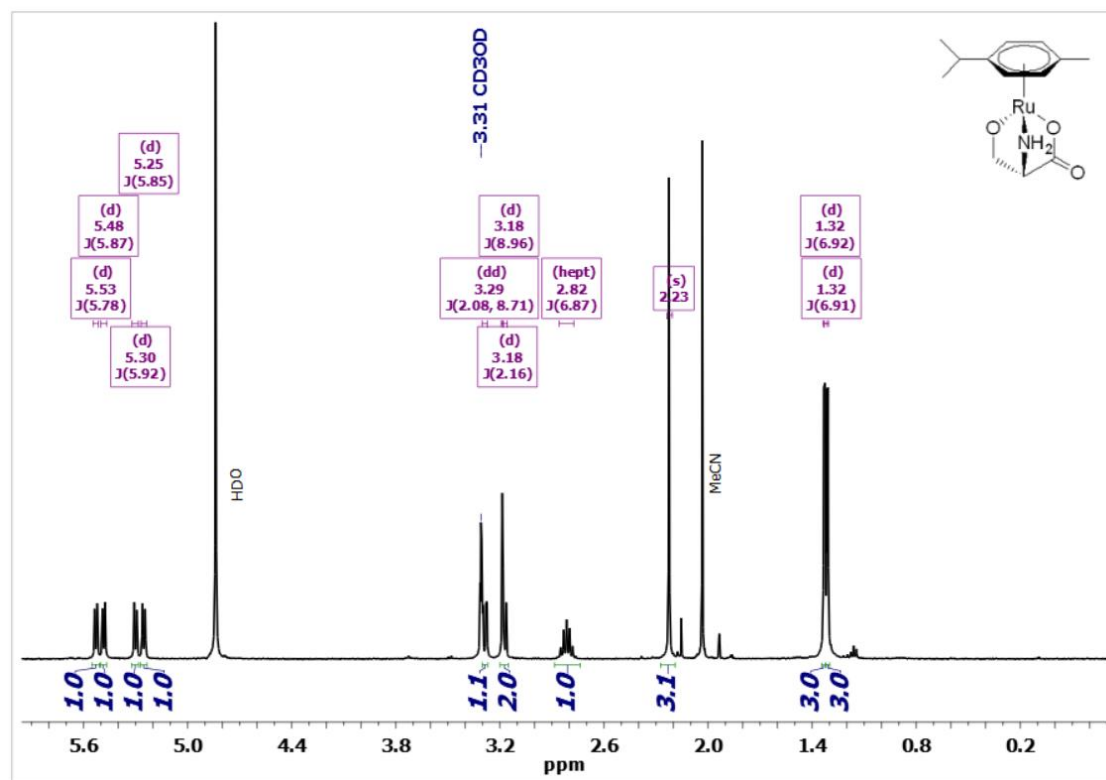

**Figure S45.**  $^{13}\text{C}\{^1\text{H}\}$  NMR spectrum (101 MHz,  $\text{CD}_3\text{OD}$ ) of  $[\text{Ru}(\kappa^3\text{N},\text{O},\text{O}'\text{-Ser})(\eta^6\text{-}p\text{-cymene})]$ , **3h**.

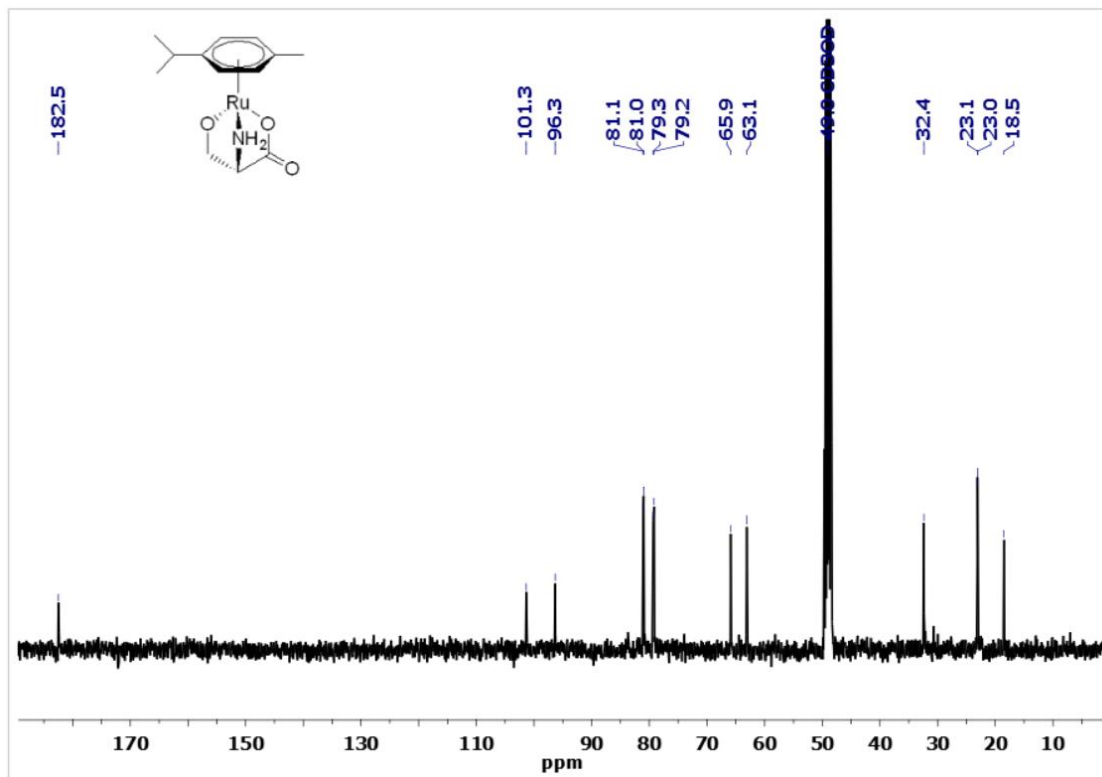

**Figure S46.**  $^1\text{H}$  NMR spectrum (401 MHz,  $\text{CD}_3\text{OD}$ ) of  $[\text{Ru}(\kappa^3\text{N},\text{O},\text{O}'\text{-Thr})(\eta^6\text{-}p\text{-cymene})]$ , **4h**.

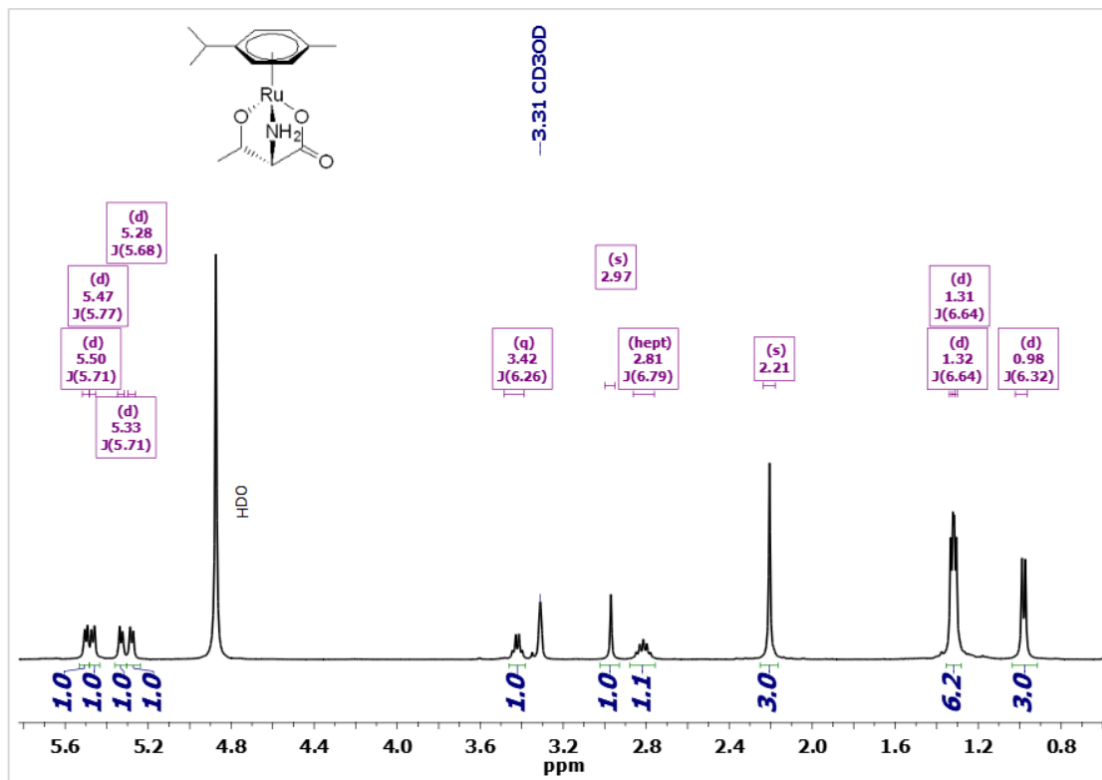

**Figure S47.**  $^{13}\text{C}\{^1\text{H}\}$  NMR spectrum (101 MHz,  $\text{CD}_3\text{OD}$ ) of  $[\text{Ru}(\kappa^3\text{N}, \text{O}, \text{O}'\text{-Thr})(\eta^6\text{-}p\text{-cymene})]$ , **4h**.

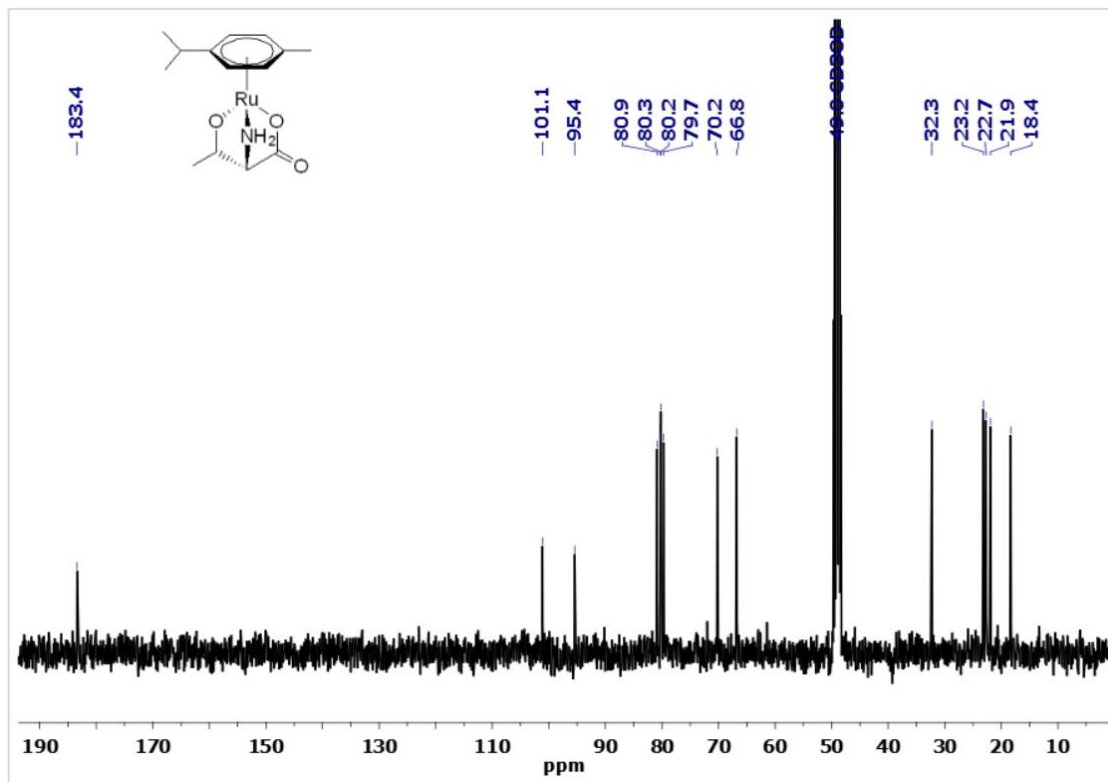

**Figure S48.**  $^1\text{H}$  NMR spectrum (401 MHz,  $\text{CD}_3\text{OD}$ ) of  $[\text{Ru}(\kappa^3\text{N}, \text{O}, \text{O}'\text{-Hom})(\eta^6\text{-}p\text{-cymene})]$ , **5h**.

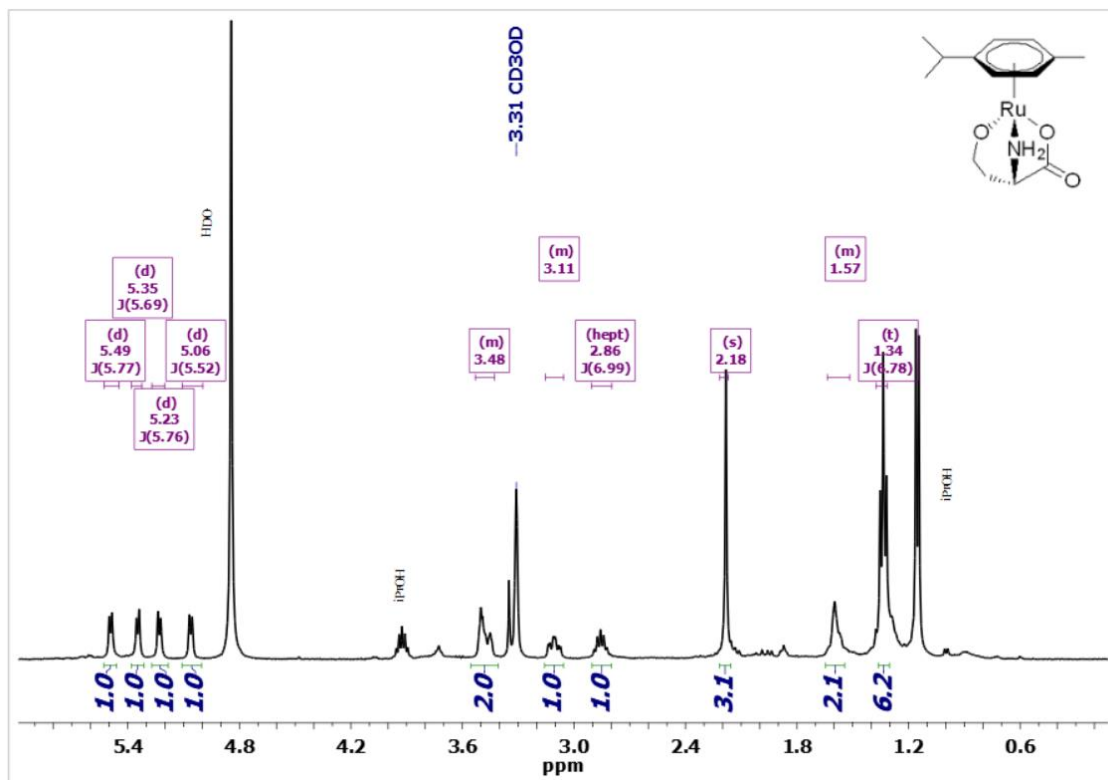

**Figure S49.**  $^{13}\text{C}\{^1\text{H}\}$  NMR spectrum (101 MHz,  $\text{CD}_3\text{OD}$ ) of  $[\text{Ru}(\kappa^3\text{N},\text{O},\text{O}'\text{-Hom})(\eta^6\text{-}p\text{-cymene})]$ , **5h**.

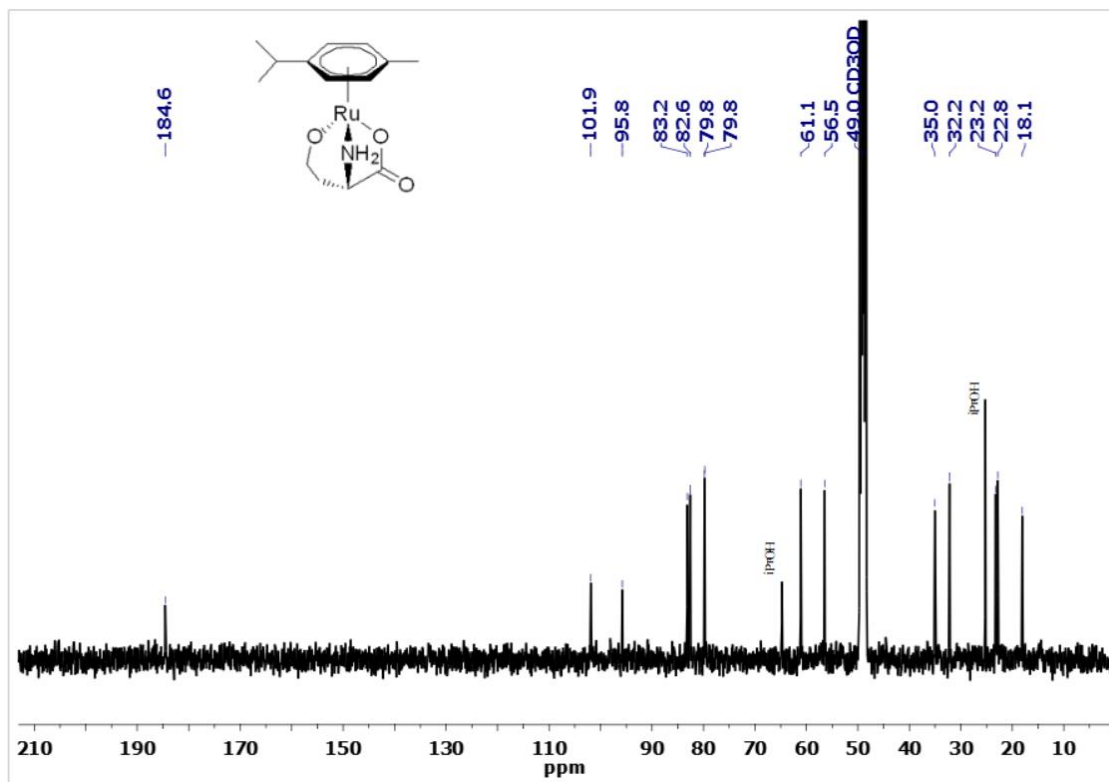

**Figure S50.**  $^1\text{H}$  NMR spectrum (401 MHz,  $\text{CD}_3\text{OD}$ ) of  $[\text{Ru}_2(\mu\text{-H})_2(\mu\text{-Cl})(\eta^6\text{-}p\text{-cymene})_2]\text{Cl}$ . Signal marked with asterisk (\*) are due to traces of **3h**.

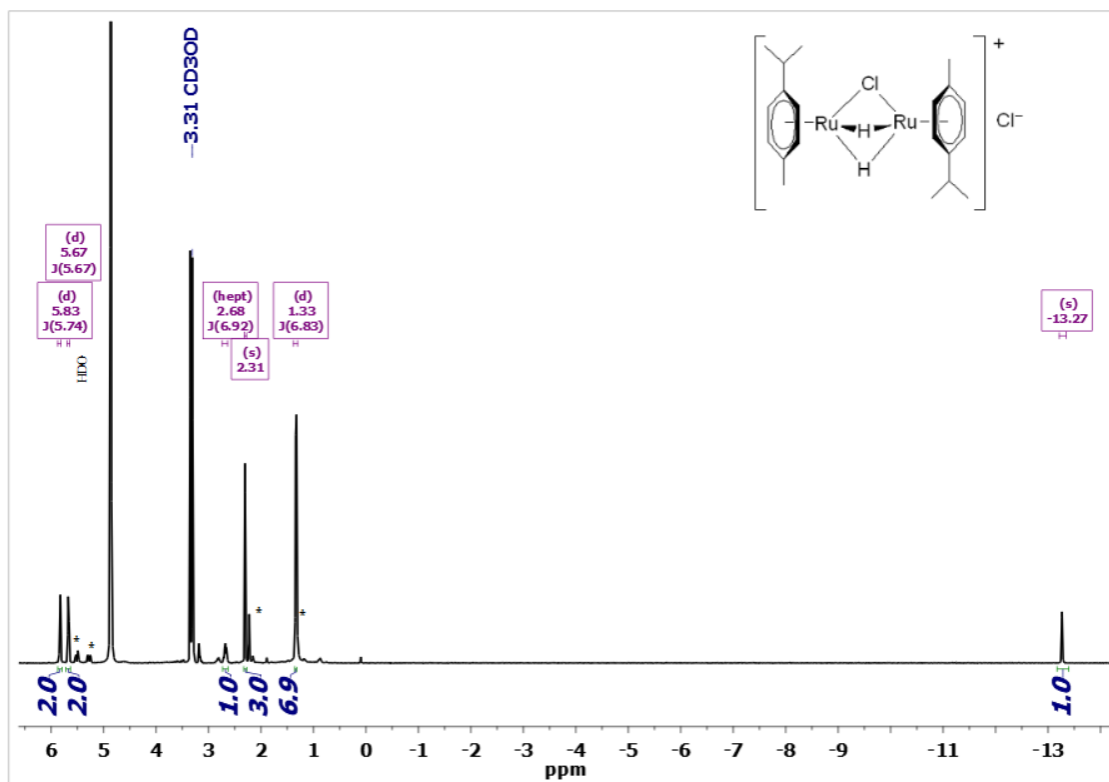

**Figure S51.**  $^1\text{H}$  NMR spectrum (401 MHz,  $\text{CD}_3\text{OD}$ ) of  $[\text{Ru}(\kappa^2\text{N}, \text{O-Ser})(\kappa\text{P-pta})(\eta^6\text{-}p\text{-cymene})]\text{Cl}$ , **[3i]**Cl. Inset shows NH resonances in the freshly-prepared solution.

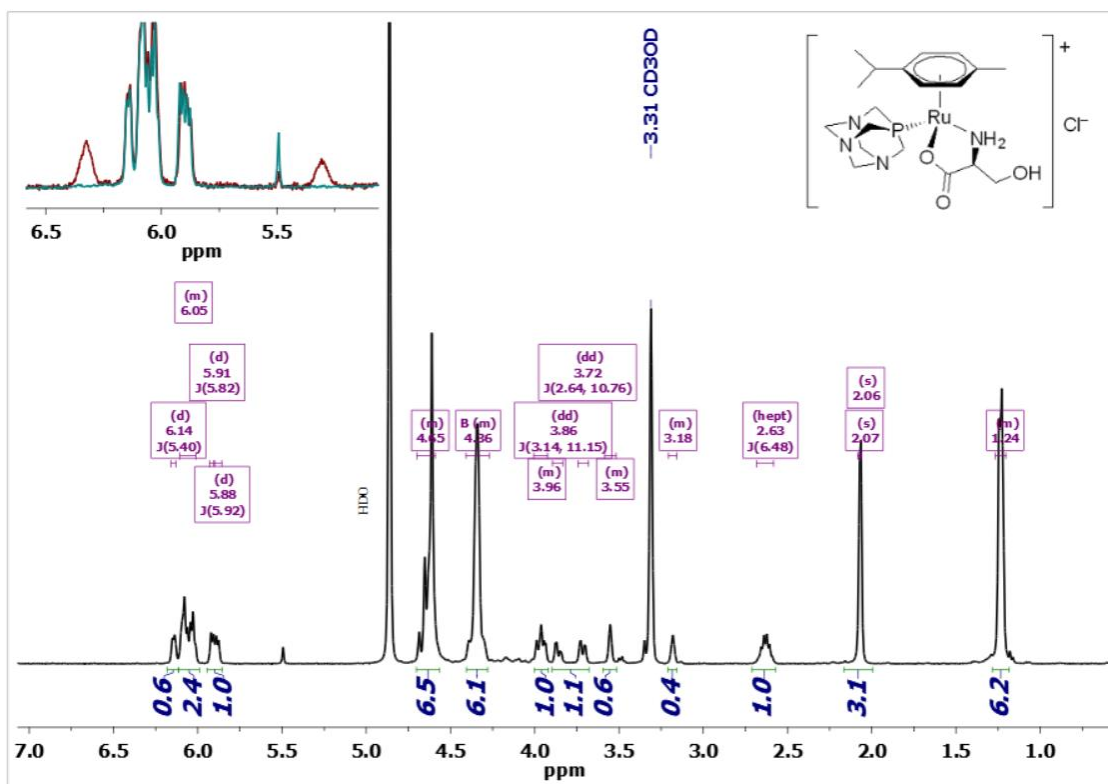

**Figure S52.**  $^{13}\text{C}\{^1\text{H}\}$  NMR spectrum (101 MHz,  $\text{D}_2\text{O}$ ) of  $[\text{Ru}(\kappa^2\text{N}, \text{O-Ser})(\kappa\text{P-pta})(\eta^6\text{-}p\text{-cymene})]\text{Cl}$ , **[3i]**Cl.

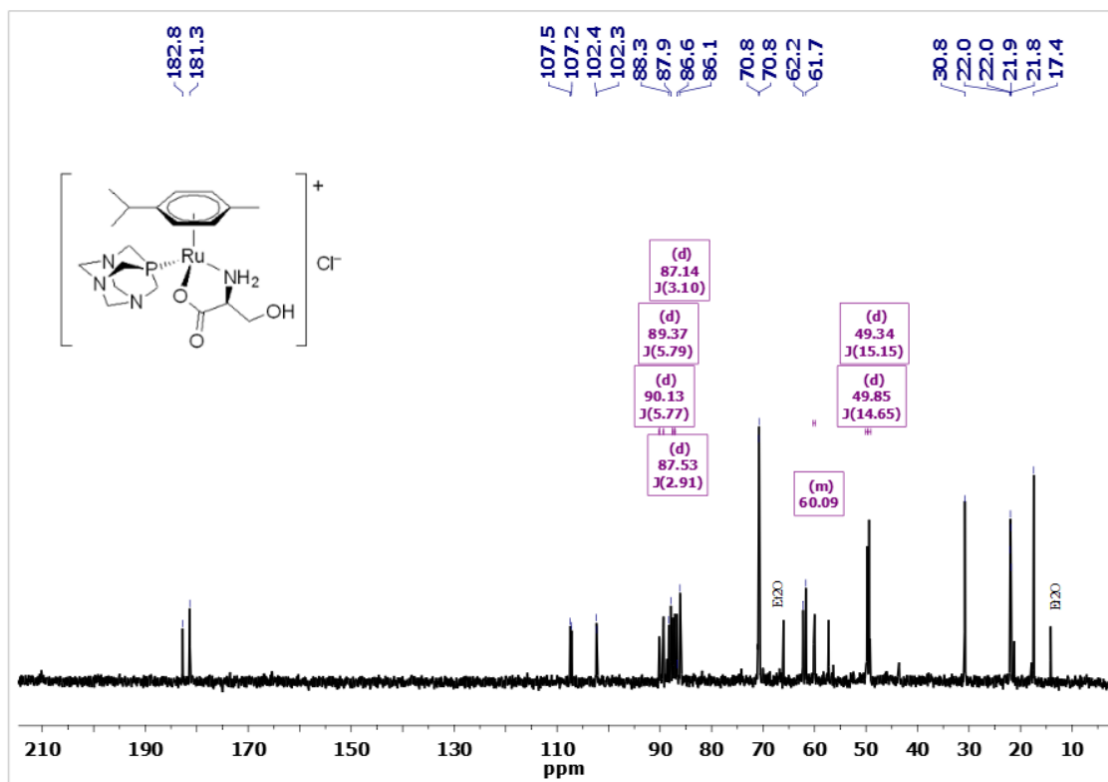



**Figure S53.**  $^{31}\text{P}\{^1\text{H}\}$  NMR spectrum (162 MHz,  $\text{CD}_3\text{OD}$ ) of  $[\text{Ru}(\kappa^2\text{N},\text{O-Ser})(\kappa\text{P-pta})(\eta^6\text{-}p\text{-cymene})]\text{Cl}$ , **[3i]Cl**.

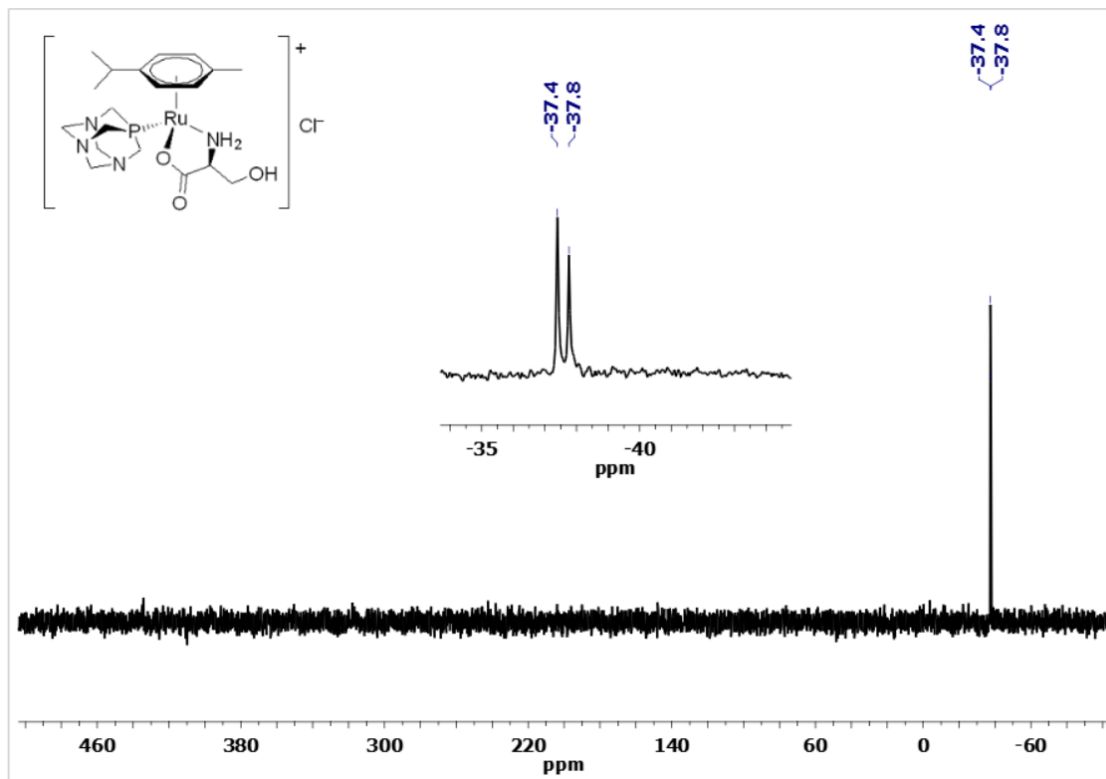

**Figure S54.**  $^{14}\text{N}$  NMR spectra (29 MHz) of: KSCN in MeOH **(a)**;  $[\text{Ru}(\text{SCN})_2(\eta^6\text{-}p\text{-cymene})]_2$  in acetone **(b)**;  $[\text{Ru}(\kappa\text{N-NCS})(\kappa^2\text{N},\text{O-Pro})(\eta^6\text{-}p\text{-cymene})]$ , **1d** in acetone **(c)**;  $[\text{Ru}(\kappa\text{N-NCS})(\kappa^2\text{N},\text{O-Hyp})(\eta^6\text{-}p\text{-cymene})]$ , **2d** in MeOH **(d)**. Instrumental peak at  $-72.2$  ppm (\*).

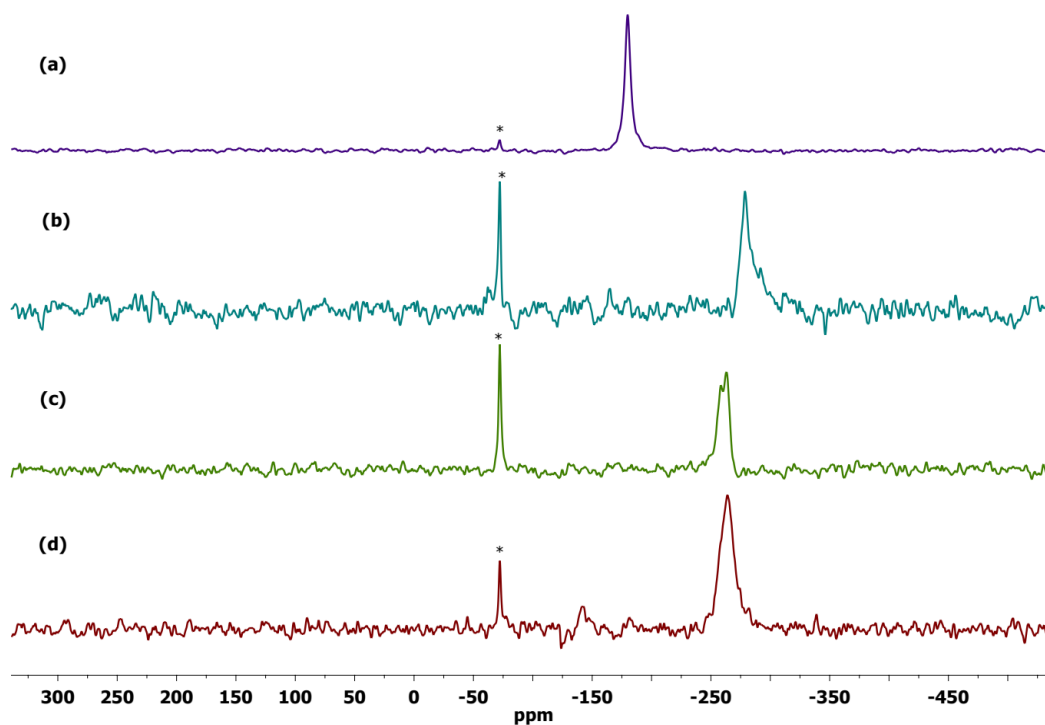

**Figure S55.**  $^{14}\text{N}$  NMR spectra (29 MHz) of:  $\text{NaN}_3$  in MeOH **(a)**;  $[\text{Ru}(\text{N}_3)_2(\eta^6\text{-}p\text{-cymene})]_2$  in acetone **(b)**;  $[\text{Ru}(\text{N}_3)(\kappa^2\text{N},\text{O-Pro})(\eta^6\text{-}p\text{-cymene})]$ , **1e** in MeOH **(c)**;  $[\text{Ru}(\text{N}_3)(\kappa^2\text{N},\text{O-Hyp})(\eta^6\text{-}p\text{-cymene})]$ , **2e** in MeOH **(d)**. Instrumental peak at  $-72.2$  ppm (\*).

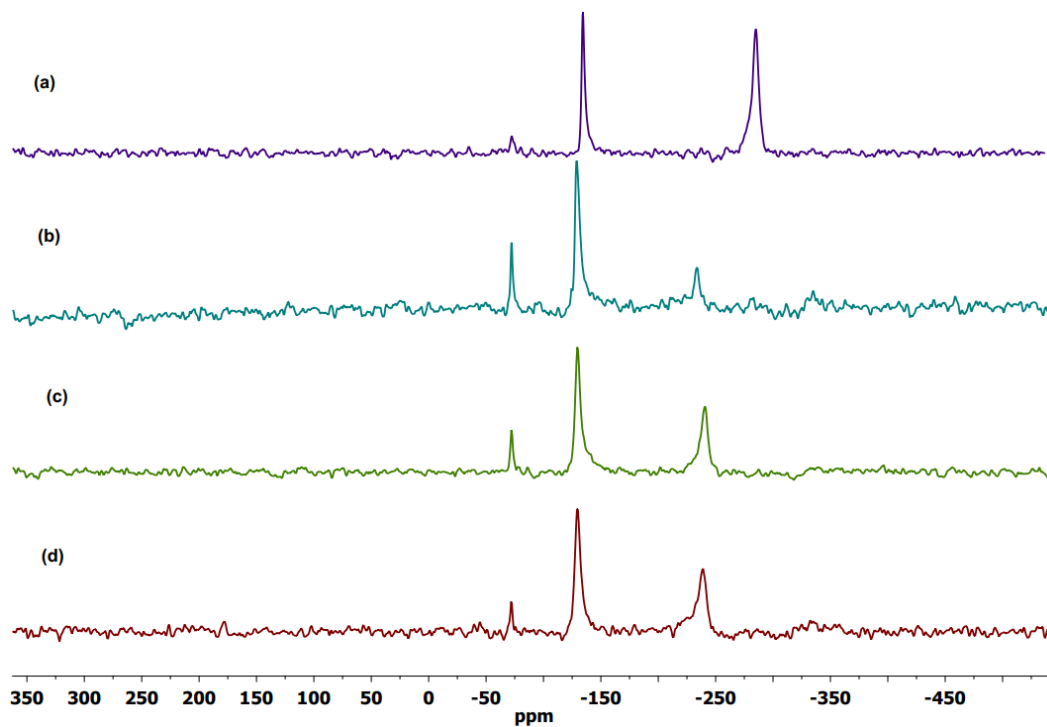

**Figure S56.**  $^{14}\text{N}$  NMR spectra (29 MHz, MeOH) of:  $\text{NaNO}_2$  **(a)**;  $[\text{Ru}(\kappa\text{N-NO}_2)(\kappa^2\text{N},\text{O-Pro})(\eta^6\text{-}p\text{-cymene})]$ , **1f** **(b)**. Instrumental peak at  $-72.2$  ppm (\*).

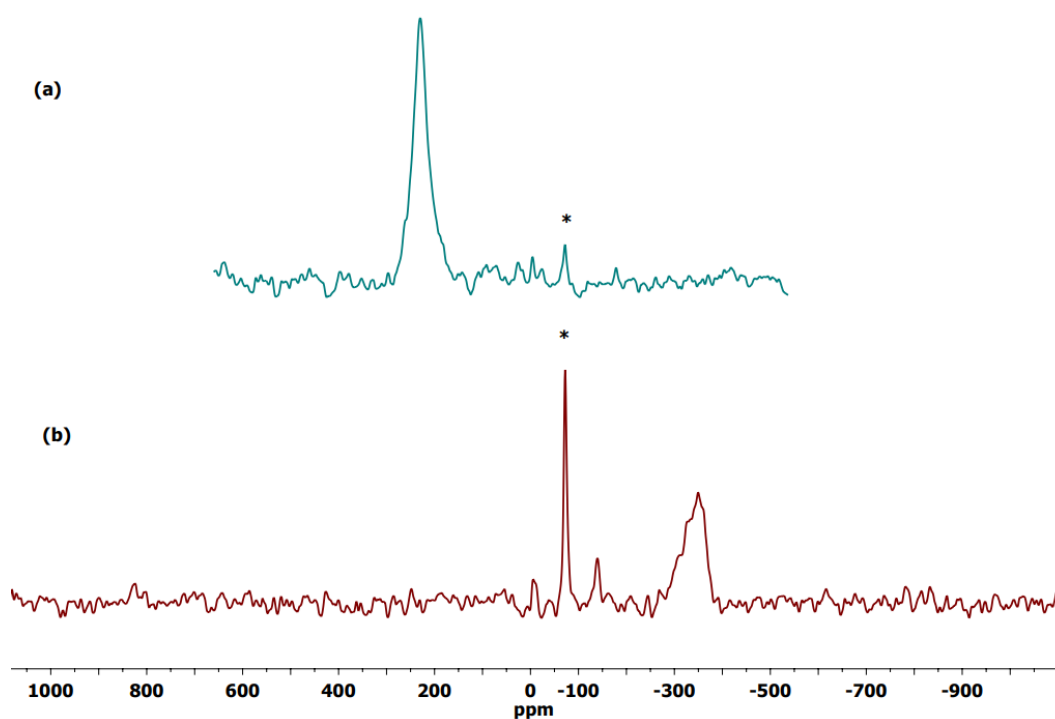

### X-ray structural data.

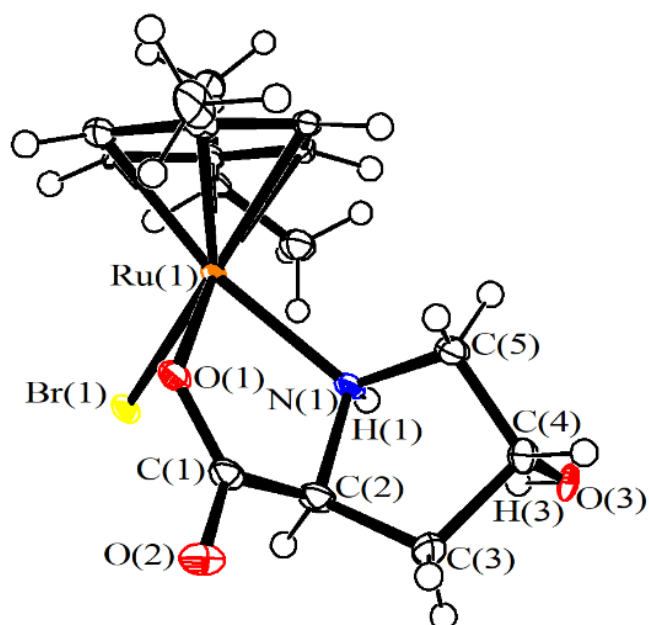

**Figure S57.** View of the X-ray structure of  $[\text{RuBr}(\kappa^2\text{N},\text{O-Hyp})(\eta^6\text{-}p\text{-cymene})]$ , **2b**. Displacement ellipsoids are at the 50% probability level. Main bond distances (Å) and angles (°):  $\text{Ru}(1)\text{-}(\eta^6\text{-}p\text{-cymene})_{\text{average}}$  2.18(6),  $\text{Ru}(1)\text{-O}(1)$  2.108(18),  $\text{Ru}(1)\text{-N}(1)$  2.16(2),  $\text{Ru}(1)\text{-Br}(1)$  2.525(3),  $\text{O}(1)\text{-C}(1)$  1.29(3),  $\text{C}(1)\text{-O}(2)$  1.24(3),  $\text{C}(1)\text{-C}(2)$  1.53(4),  $\text{C}(2)\text{-C}(3)$  1.51(4),  $\text{C}(3)\text{-C}(4)$  1.60(4),  $\text{C}(4)\text{-C}(5)$  1.51(4),  $\text{N}(1)\text{-C}(2)$  1.55(3),  $\text{N}(1)\text{-C}(5)$  1.49(4),  $\text{C}(4)\text{-O}(3)$  1.46(2),  $\text{Ru}(1)\text{-O}(1)\text{-C}(1)$  117.1(16),  $\text{O}(1)\text{-C}(1)\text{-C}(2)$  119(2),  $\text{C}(1)\text{-C}(2)\text{-N}(1)$  108(2),  $\text{C}(2)\text{-N}(1)\text{-Ru}(1)$  109.6(17),  $\text{O}(1)\text{-Ru}(1)\text{-N}(1)$  77.9(8).

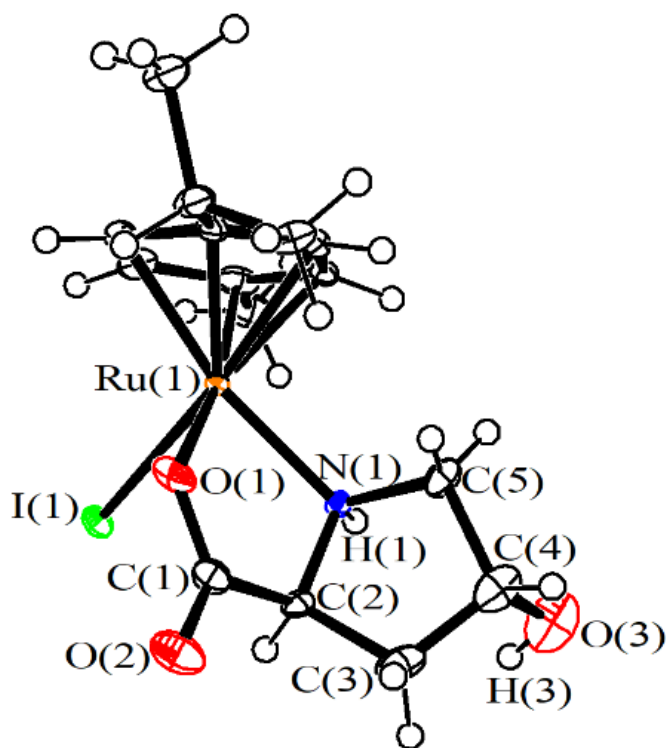

**Figure S58.** View of the X-ray structure of  $[\text{Ru}(\kappa^2\text{N},\text{O-Hyp})(\eta^6\text{-}p\text{-cymene})]$ , **2c**. Displacement ellipsoids are at the 50% probability level. Main bond distances (Å) and angles (°):  $\text{Ru}(1)\text{-}(\eta^6\text{-}p\text{-cymene})_{\text{average}}$  2.19(4),  $\text{Ru}(1)\text{-O}(1)$  2.144(11),  $\text{Ru}(1)\text{-N}(1)$  2.142(12),  $\text{Ru}(1)\text{-I}(1)$  2.7434(15),  $\text{O}(1)\text{-C}(1)$  1.30(2),  $\text{C}(1)\text{-O}(2)$  1.24(2),  $\text{C}(1)\text{-C}(2)$  1.52(2),  $\text{C}(2)\text{-C}(3)$  1.56(2),  $\text{C}(3)\text{-C}(4)$  1.52(3),  $\text{C}(4)\text{-C}(5)$  1.52(2),  $\text{N}(1)\text{-C}(2)$  1.466(18),  $\text{N}(1)\text{-C}(5)$  1.495(19),  $\text{C}(4)\text{-O}(3)$  1.46(2),  $\text{Ru}(1)\text{-O}(1)\text{-C}(1)$  114.2(9),  $\text{O}(1)\text{-C}(1)\text{-C}(2)$  118.4(13),  $\text{C}(1)\text{-C}(2)\text{-N}(1)$  109.4(12),  $\text{C}(2)\text{-N}(1)\text{-Ru}(1)$  110.5(9),  $\text{O}(1)\text{-Ru}(1)\text{-N}(1)$  76.2(4).

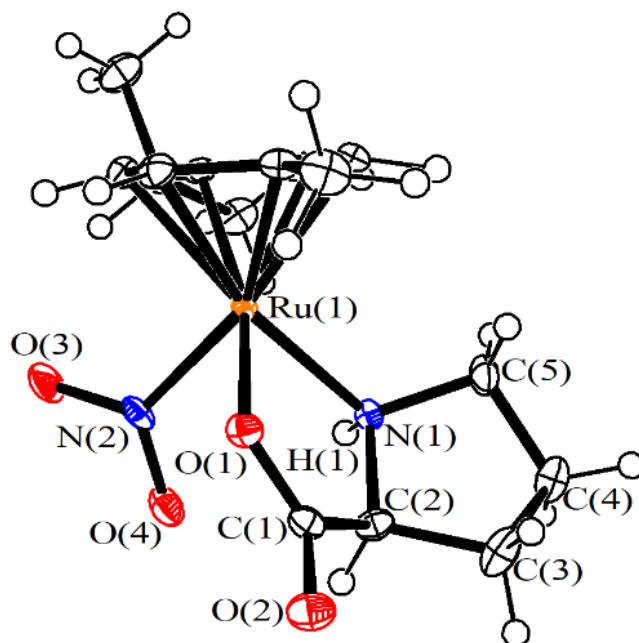

**Figure S59.** View of the X-ray structure of  $[\text{Ru}(\text{NO}_2)(\kappa^2\text{N},\text{O-Pro})(\eta^6\text{-}p\text{-cymene})]$ , **1f**. Displacement ellipsoids are at the 50% probability level. Main bond distances (Å) and angles (°):  $\text{Ru}(1)\text{-}(\eta^6\text{-}p\text{-cymene})_{\text{average}}$  2.203(5),  $\text{Ru}(1)\text{-O}(1)$  2.0694(17),  $\text{Ru}(1)\text{-N}(1)$  2.1262(18),  $\text{Ru}(1)\text{-N}(2)$  2.0888(18),  $\text{O}(1)\text{-C}(1)$  1.289(3),  $\text{C}(1)\text{-O}(2)$  1.236(3),  $\text{C}(1)\text{-C}(2)$  1.521(3),  $\text{C}(2)\text{-C}(3)$  1.536(3),  $\text{C}(3)\text{-C}(4)$  1.530(4),  $\text{C}(4)\text{-C}(5)$  1.522(3),  $\text{N}(1)\text{-C}(2)$  1.514(3),  $\text{N}(1)\text{-C}(5)$  1.501(3),  $\text{N}(2)\text{-O}(3)$  1.247(3),  $\text{N}(2)\text{-O}(4)$  1.242(3),  $\text{Ru}(1)\text{-O}(1)\text{-C}(1)$  118.71(15),  $\text{O}(1)\text{-C}(1)\text{-C}(2)$  117.5(2),  $\text{C}(1)\text{-C}(2)\text{-N}(1)$  111.52(18),  $\text{C}(2)\text{-N}(1)\text{-Ru}(1)$  111.08(14),  $\text{O}(1)\text{-Ru}(1)\text{-N}(1)$  79.70(7),  $\text{O}(3)\text{-N}(2)\text{-O}(4)$  118.5(2).

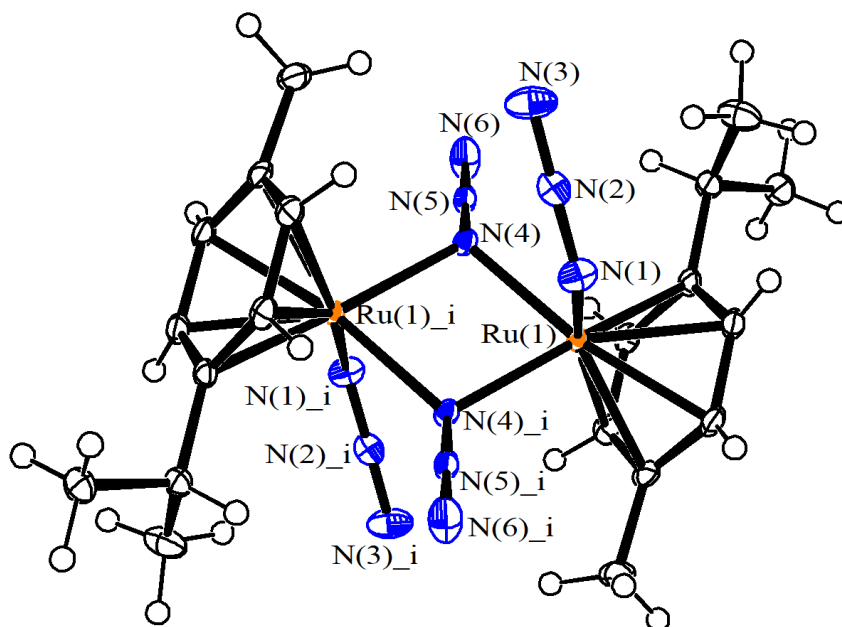

**Figure S60.** View of the X-ray structure of  $[\text{Ru}(\text{N}_3)_2(\eta^6\text{-p-cymene})]_2$  (**Ru-N3**). Displacement ellipsoids are at the 50% probability level. Main bond distances (Å) and angles (°):  $\text{Ru}(1)\text{-}(\eta^6\text{-p-cymene})_{\text{average}}$  2.183(4),  $\text{Ru}(1)\text{-N}(1)$  2.1063(15),  $\text{Ru}(1)\text{-N}(4)$  2.1314(14),  $\text{Ru}(1)\text{-N}(4)_i$  2.1610(14),  $\text{N}(1)\text{-N}(2)$  1.193(2),  $\text{N}(2)\text{-N}(3)$  1.160(2),  $\text{N}(4)\text{-N}(5)$  1.222(2),  $\text{N}(5)\text{-N}(6)$  1.140(2),  $\text{Ru}(1)\text{-N}(1)\text{-N}(2)$  120.67(12),  $\text{N}(1)\text{-N}(2)\text{-N}(3)$  176.90(18),  $\text{Ru}(1)\text{-N}(4)\text{-Ru}(1)_i$  104.97(6),  $\text{Ru}(1)\text{-N}(4)\text{-N}(5)$  121.88(11),  $\text{N}(4)\text{-N}(5)\text{-N}(6)$  177.27(19),  $\text{N}(4)\text{-Ru}(1)\text{-N}(4)_i$  75.03(6). Symmetry transformation used to generate equivalent atoms:  $-x+1, -y+1, -z+1$ .

**Table S3.** Hydrogen bonds (Å and °) for **2b**, **2c**, **2d** and **2e**.

| Complex     | D-H...A             | d(D-H) | d(H...A) | d(D...A)  | <(DHA) |
|-------------|---------------------|--------|----------|-----------|--------|
| <b>2b</b> * | O(3)-H(3)...O(5)#1  | 0.84   | 1.90     | 2.72(2)   | 165.8  |
|             | N(1)-H(1)...O(5)#1  | 1.00   | 2.21     | 3.07(3)   | 142.6  |
|             | O(6)-H(6)...O(1)#2  | 0.84   | 2.04     | 2.84(3)   | 159.4  |
|             | N(2)-H(2A)...O(2)#2 | 1.00   | 1.98     | 2.95(3)   | 160.4  |
| <b>2c</b>   | N(1)-H(1)...O(2)#3  | 1.00   | 1.89     | 2.875(3)  | 166.3  |
|             | O(3)-H(3)...O(1)#3  | 0.84   | 2.11     | 2.935(3)  | 166.6  |
|             | C(2)-H(2)...O(1)#3  | 1.00   | 2.60     | 3.425(3)  | 139.5  |
| <b>2d</b>   | N(1)-H(1)...O(2)#4  | 1.00   | 2.11     | 2.942(9)  | 139.3  |
|             | O(3)-H(3)...O(2)#4  | 0.84   | 2.00     | 2.829(9)  | 167.7  |
| <b>2e</b>   | N(1)-H(1)...O(2)#5  | 1.00   | 1.82     | 2.799(17) | 167.0  |
|             | O(3)-H(3)...O(1)#5  | 0.84   | 2.16     | 2.961(17) | 159.1  |

Symmetry transformations used to generate equivalent atoms: #1  $-x+1, y+1/2, -z+2$ ; #2  $-x+1, y-1/2, -z+1$ ; #3  $-x+1, y-1/2, -z+3/2$ ; #4  $x-1, y, z$ ; #5  $x-1/2, -y+1/2, -z+1$

\* Two independent molecules are present within the unit cell.

## Speciation in water and in cell culture medium.

### [RuCl( $\kappa^2N,O$ -Pro)( $\eta^6$ -*p*-cymene)], **1a**, in D<sub>2</sub>O.

**1a.** <sup>1</sup>H NMR (D<sub>2</sub>O; with excess Cl<sup>-</sup>):  $\delta$ /ppm = 5.94, 5.85 (d,  $J$  = 5.9 Hz, 1H); 5.74, 5.68 (app-t,  $J$  = 6.7 Hz, 2H); 5.59, 5.52 (d,  $J$  = 6.0 Hz, 1H); 4.07 (dd,  $J$  = 11.2, 5.9 Hz), 3.77 (d,  $J$  = 9.1 Hz) (1H); 3.44 (t,  $J$  = 8.6 Hz, 1H); 3.21 (td,  $J$  = 11.4, 5.9 Hz), 3.15–3.08 (m) (1H); 2.81 (hept,  $J$  = 6.9 Hz, 1H); 2.27–2.20 (m, 1H); 2.17, 2.15 (s, 3H); 2.06–1.97 (m, 1H); 1.89–1.79, 1.79–1.65 (m, 2H); 1.34, 1.29 (d,  $J$  = 6.9 Hz, 6H). Isomer ratio = 7.

**[1w]<sup>+</sup>.** <sup>1</sup>H NMR (D<sub>2</sub>O):  $\delta$ /ppm = 5.96–5.89 (m, 1H); 5.79–5.72 (m), 5.69 (d,  $J$  = 6.0 Hz) (2H); 5.59, 5.51 (d,  $J$  = 5.8 Hz, 1H); 4.06 (dd,  $J$  = 10.8, 5.1 Hz), 3.77 (t,  $J$  = 8.4 Hz) (1H); 3.36–3.18 (m), 2.66–2.54 (m) (2H), 2.82 (hept,  $J$  = 6.9 Hz, 1H); 2.19, 2.18 (s, 3H), 2.16–2.07, 1.34–1.25 (m, 1H) 2.06–1.92 (m, 1H), 1.85–1.63 (m, 2H). Isomer ratio = 2.6. Cl<sup>-</sup>. <sup>35</sup>Cl NMR (D<sub>2</sub>O):  $\delta$ /ppm = 0.44 ( $\Delta\nu_{1/2}$  = 22 Hz).

**Figure S61.** <sup>1</sup>H NMR spectra (3–6 ppm region) of **1a** in D<sub>2</sub>O: freshly prepared solution (**a**), following AgNO<sub>3</sub> (**b**) or NaCl addition (**c**). Spectra aligned to the **1a**/D<sub>2</sub>O solution to compensate ionic strength effects on chemical shift.

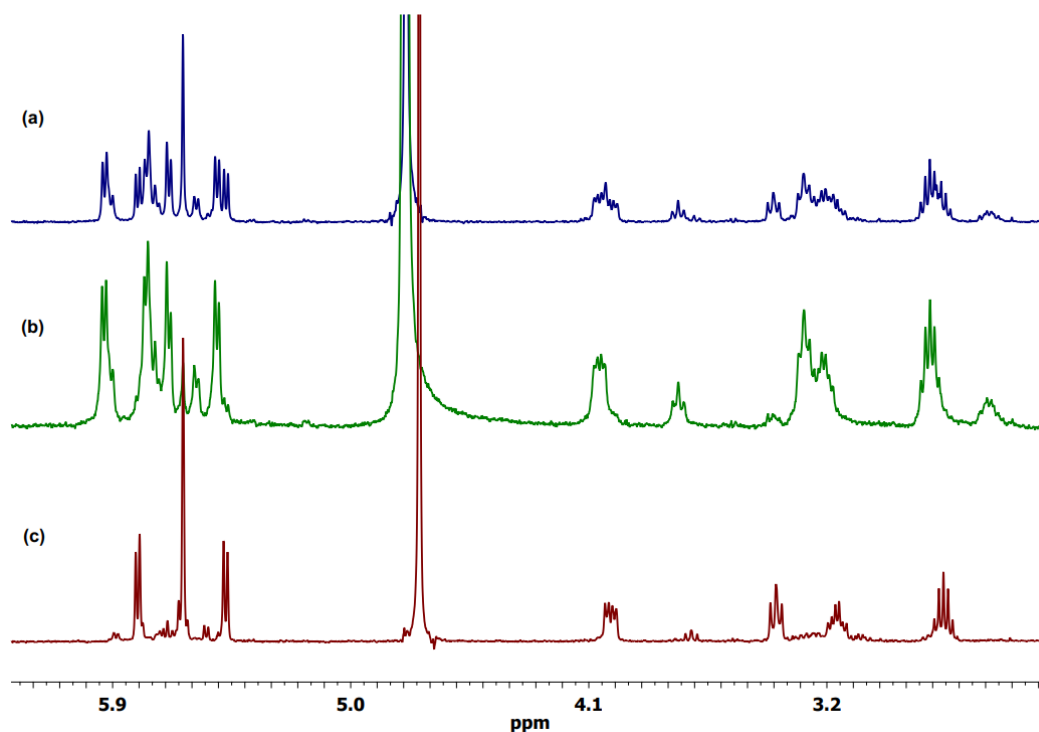

**[RuBr( $\kappa^2N,O$ -Pro)( $\eta^6$ -*p*-cymene)], **1b**, in D<sub>2</sub>O.**

**1b.** <sup>1</sup>H NMR (D<sub>2</sub>O; with excess Br<sup>-</sup>):  $\delta$ /ppm = 5.86, 5.81 (d,  $J$  = 5.9 Hz, 1H); 5.78, 5.73 (d,  $J$  = 6.1 Hz, 1H); 5.69–5.63 (m, 1H); 5.57, 5.49 (d,  $J$  = 6.0 Hz, 1H); 4.06 (dd,  $J$  = 11.0, 5.8 Hz, 1H); 3.50–3.45, 3.39–3.32 (m, 1H); 3.21 (td,  $J$  = 11.5, 5.6 Hz, 1H); 2.82 (hept,  $J$  = 6.9 Hz, 1H); 2.25–2.15 (m), 2.18 (s), 2.16 (s) (4H), 2.06–1.96 (m, 1H); 1.87–1.78, 1.76–1.63 (m, 2H); 1.33, 1.27 (d,  $J$  = 6.9 Hz, 6H). Isomer ratio = 6.

**Br<sup>-</sup>.** <sup>81</sup>Br NMR (D<sub>2</sub>O):  $\delta$ /ppm = - 3.4 ( $\Delta\nu_{1/2} \approx 10^3$  Hz).

**Figure S62.** <sup>1</sup>H NMR spectra (3-6 ppm region) of **1b** in D<sub>2</sub>O: freshly prepared solution (**a**), following AgNO<sub>3</sub> (**b**) or NaBr addition (**c**). Spectra aligned to the **1b**/D<sub>2</sub>O solution to compensate ionic strength effects on chemical shift.

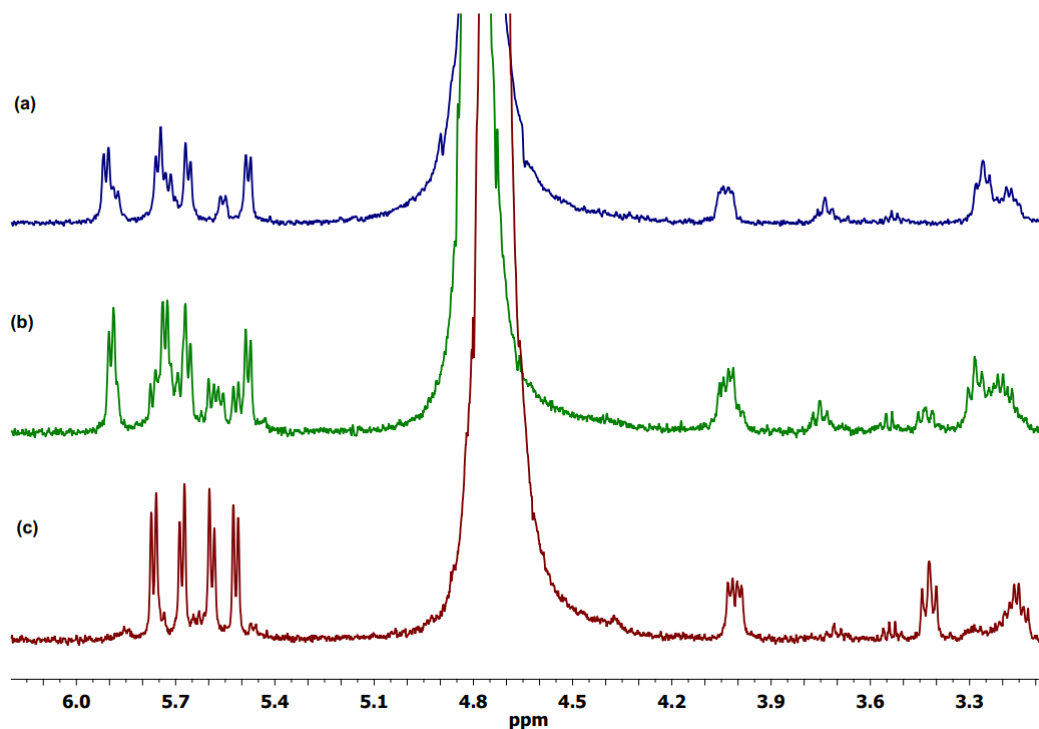



**[RuI( $\kappa^2N,O$ -Pro)( $\eta^6$ -*p*-cymene)], **1c**, in D<sub>2</sub>O.**

**1c.** <sup>1</sup>H NMR (D<sub>2</sub>O; with excess I<sup>-</sup>):  $\delta$ /ppm = 5.97, 5.91 (d,  $J$  = 6.0 Hz, 1H); 5.82, 5.78 (d,  $J$  = 5.9 Hz, 1H); 5.74 (d,  $J$  = 5.9 Hz, 1H); 5.65, 5.58 (d,  $J$  = 6.0 Hz, 1H); 4.06 (dd,  $J$  = 11.1, 5.8 Hz, 1H), 3.58–3.49 (m, 1H), 3.23 (td,  $J$  = 11.4, 5.4 Hz, 1H), 2.85 (hept,  $J$  = 7.0 Hz, 1H); 2.27–2.15 (m), 2.19 (s), 2.17 (s), (4H); 2.05–1.96 (m, 1H), 1.79–1.65 (m, 2H); 1.33, 1.27 (d,  $J$  = 6.9 Hz, 6H). Isomer ratio  $\approx$  16.

I<sup>-</sup>. <sup>127</sup>I NMR (D<sub>2</sub>O):  $\delta$ /ppm = - 1.0 (br.).

**Figure S63.** <sup>1</sup>H NMR spectra (3-6 ppm region) of **1c** in D<sub>2</sub>O: freshly prepared solution (**a**); following AgNO<sub>3</sub> (**b**) or NaI addition (**c**). Spectra aligned to the **1c**/D<sub>2</sub>O solution to compensate ionic strength effects on chemical shift.

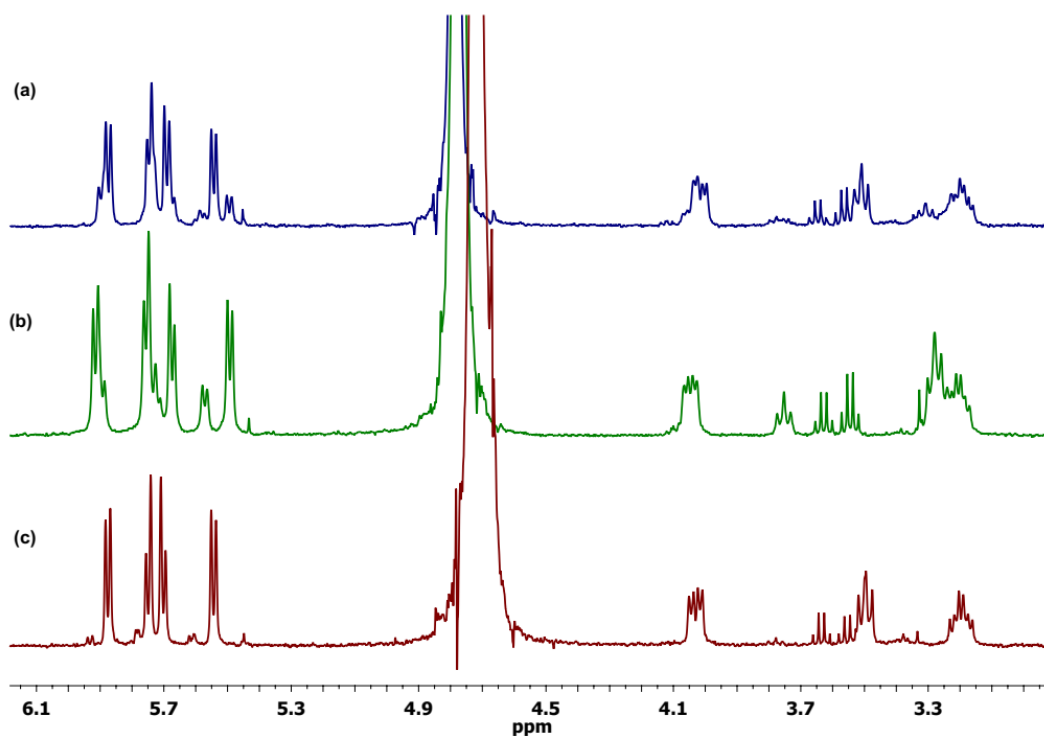

**[Ru( $\kappa$ N-NCS)( $\kappa^2$ N,O-Pro)( $\eta^6$ -*p*-cymene)], **1d**, in D<sub>2</sub>O or D<sub>2</sub>O/CD<sub>3</sub>OD 5:2 v/v.**

**1d**. <sup>1</sup>H NMR (D<sub>2</sub>O):  $\delta$ /ppm = 5.85 (d), 5.81 (app-t), 5.76 (d) (2H); 5.69–5.65 (m, 1H); 5.62, 5.55 (d, 1H), 4.01–3.95, 3.79–3.72 (m, 1H); 3.41–3.30 (m), 2.82–2.70 (m); 2.13, 2.12 (s, 3H), 1.32–1.24 (m, 6H).

Isomer ratio  $\approx$  1. Solubility of **1d** in D<sub>2</sub>O was insufficient to carry out a detailed speciation study.

<sup>1</sup>H NMR (D<sub>2</sub>O/CD<sub>3</sub>OD 5:2):  $\delta$ /ppm = 5.86 (d,  $J$  = 5.9 Hz), 5.83–5.81 (m, 1H), 5.76 (d,  $J$  = 6.1 Hz) (2H); 5.70–5.65 (m, 1H); 5.62, 5.56 (d,  $J$  = 5.8 Hz, 1H); 3.98 (dd,  $J$  = 11.2, 4.9 Hz), 3.73 (t,  $J$  = 8.7 Hz) (1H), 3.40–3.34, 3.26–3.17 (m, 1H); 3.09–3.00, 2.93–2.84 (m, 1H); 2.82–2.71 (m, 1H), 2.15, 2.14 (s, 1H); 2.05–1.93 (m, 1H), 1.84–1.62 (m, 2H); 1.32, 1.29 (d,  $J$  = 6.8 Hz, 6H). Isomer ratio = 1.2.

**Figure S64.** <sup>1</sup>H NMR spectra (3–6 ppm region) of **1d** in D<sub>2</sub>O/CD<sub>3</sub>OD 5:2: freshly prepared solution (**a**), following KSCN (**b**) or AgNO<sub>3</sub> addition (**c**); 24 h after AgNO<sub>3</sub> addition (**d**). Spectra aligned to the **1d**/D<sub>2</sub>O solution to compensate ionic strength effects on chemical shift.

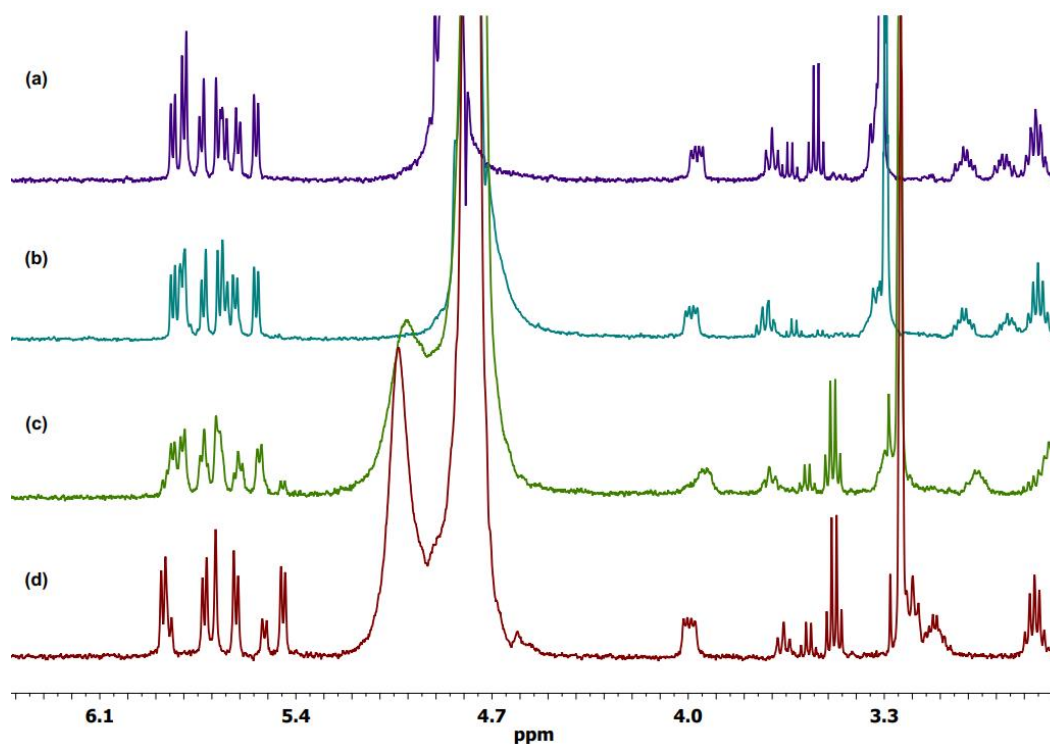

**[Ru(N<sub>3</sub>)(κ<sup>2</sup>N,*O*-Pro)(η<sup>6</sup>-*p*-cymene)], **1e**, in D<sub>2</sub>O.**

**1e.** <sup>1</sup>H NMR (D<sub>2</sub>O): δ/ppm = 5.77, 5.74 (d, *J* = 6.0 Hz, 1H); 5.71, 5.67 (d, *J* = 6.0 Hz, 1H); 5.59, 5.57 (d, *J* = 6.1 Hz, 1H); 5.54, 5.49 (d, *J* = 6.0 Hz, 1H); 3.96 (dd, *J* = 10.8, 5.3 Hz), 3.75 (t, *J* = 8.7 Hz) (1H); 3.33–3.27, 3.27–3.20 (m, 1H); 3.19–3.10, 2.71–2.62 (m, 1H); 2.78 (hept, *J* = 6.5 Hz, 1H), 2.26–2.16 (m, 1H); 2.16, 2.13 (s, 3H); 2.01–1.81 (m, 1H), 1.79–1.56 (m, 2H), 1.32–1.25 (m, 6H). Isomer ratio = 2.5.

**Figure S65.** <sup>1</sup>H NMR spectra (3-6 ppm region) of **1e** in D<sub>2</sub>O: freshly prepared solution **(a)**; following NaN<sub>3</sub> **(b)** or AgNO<sub>3</sub> addition **(c)**; 24 h after AgNO<sub>3</sub> addition **(d)**. Spectra aligned to the **1e**/D<sub>2</sub>O solution to compensate ionic strength effects on chemical shift.

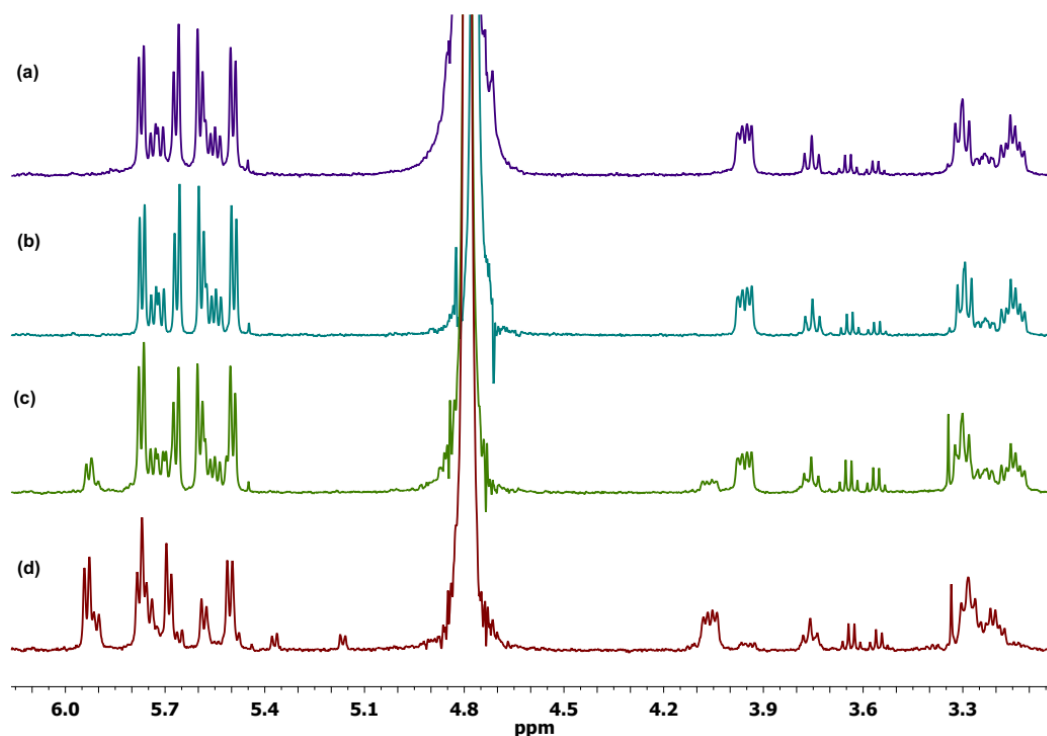

**[RuCl( $\kappa^2N,O$ -Hyp)( $\eta^6$ -*p*-cymene)], **2a**, in D<sub>2</sub>O.**

**2a.** <sup>1</sup>H NMR (D<sub>2</sub>O, with excess Cl<sup>-</sup>):  $\delta$ /ppm = 5.85 (d,  $J$  = 6.0 Hz), 5.84–5.82 (m) (1H); 5.77 (d,  $J$  = 5.4 Hz), 5.73–5.67 (m) (2H); 5.62, 5.55 (d,  $J$  = 6.1 Hz, 1H); 4.58–4.50, 4.44–4.38 (m, 1H); 4.06–3.96 (m, 1H); 3.66 (t,  $J$  = 9.0 Hz), 3.30 (d,  $J$  = 12.4 Hz) (1H); 3.42–3.36 (m, 1H); 2.81 (hept,  $J$  = 6.9 Hz, 1H); 2.25–2.19, 2.13–2.06 (m, 1H); 2.18, 2.16 (s, 3H), 2.03–1.93, 1.81–1.70 (m, 1H); 1.37 – 1.25 (m, 6H).  
Isomer ratio = 3.5.

**[2w]<sup>+</sup>.** <sup>1</sup>H NMR (D<sub>2</sub>O):  $\delta$ /ppm = 5.97–5.92 (m, 1H); 5.82–5.76 (m), 5.69 (d) (2H); 5.62, 5.55 (d,  $J$  = 6.1 Hz, 1H); 4.51, 4.41 (s-br, 1H); 4.05–3.97 (m, 1H), 3.51, (app-t,  $J$  = 9.1 Hz), 2.89–2.75\* (m) (0.6H); 3.36, 3.28 (d,  $J$  = 12.6 Hz, 1H), 2.89–2.75\* (m, 1.4H); 2.20 (s, 3H); 2.18–2.08 (m, 1H), 2.01–1.85, 1.70–1.57 (m, 1H), 1.35–1.20 (m, 6H). \*Superimposed. Isomer ratio = 1.5.

**Cl<sup>-</sup>.** <sup>35</sup>Cl NMR (D<sub>2</sub>O):  $\delta$ /ppm = 0.34 ( $\Delta\nu_{1/2}$  = 25 Hz).

**Figure S66.** <sup>1</sup>H NMR spectra (3–6 ppm region) of **2a** in D<sub>2</sub>O: freshly prepared solution (**a**); following AgNO<sub>3</sub> (**b**) or NaCl addition (**c**). Spectra aligned to the **2a**/D<sub>2</sub>O solution to compensate ionic strength effects on chemical shift.

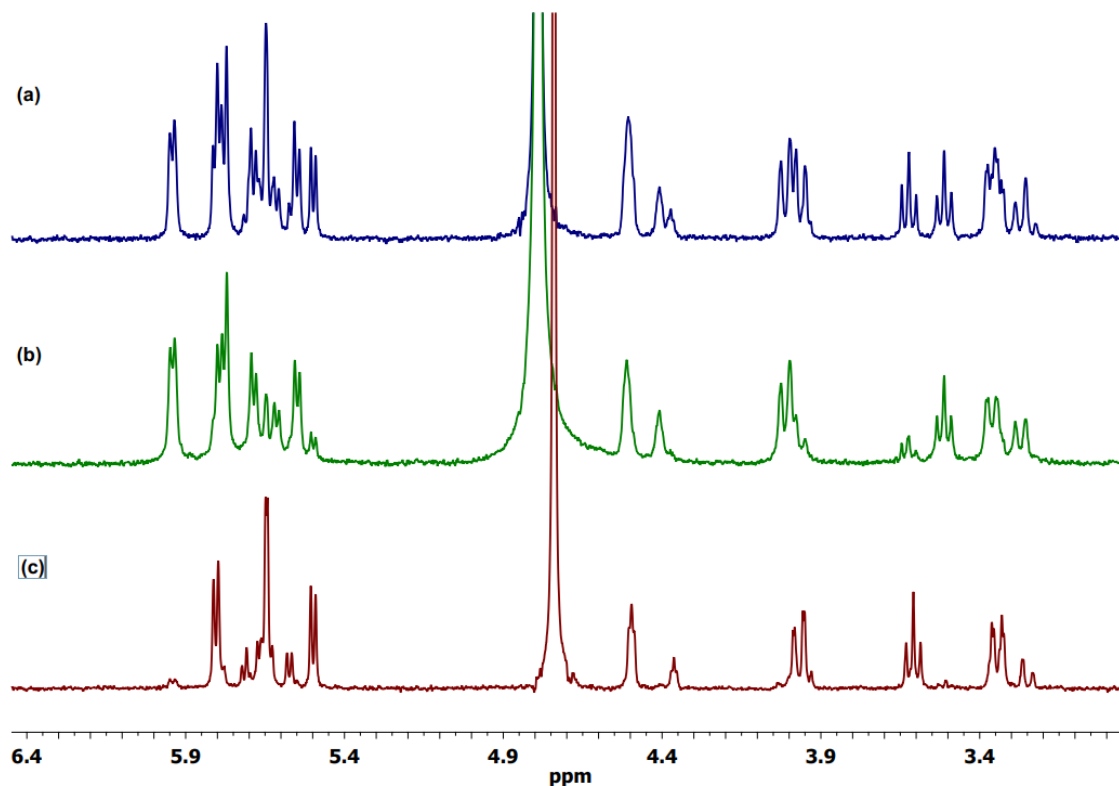

**[RuBr( $\kappa^2N,O$ -Hyp)( $\eta^6$ -*p*-cymene)], **2b**, in D<sub>2</sub>O.**

**2b.** <sup>1</sup>H NMR (D<sub>2</sub>O, with excess Br<sup>-</sup>):  $\delta$ /ppm = 5.88 (br.), 5.78–5.73 (m), 5.69 (d,  $J$  = 5.9 Hz) (2H); 5.65, 5.61, 5.55 (d,  $J$  = 5.9 Hz), 5.51 (br.) (2H); 4.53–4.47, 4.37–4.33 (m, 1H); 4.02–3.91 (m, 1H); 3.65 (t,  $J$  = 9.0 Hz), 3.28 (d,  $J$  = 12.3 Hz) (1H); 3.52–3.48, 3.39–3.32 (m, 1H); 2.78 (hept,  $J$  = 6.8 Hz, 1H), 2.21–2.11 (m, 4H), 2.00–1.89; 1.83–1.72 (m, 1H); 1.34–1.20 (m, 6H). Isomer ratio = 5.

**Br<sup>-</sup>.** <sup>81</sup>Br NMR (D<sub>2</sub>O):  $\delta$ /ppm = - 1.9 ( $\Delta\nu_{1/2} \approx 8 \cdot 10^2$  Hz).

**Figure S67.** <sup>1</sup>H NMR spectra (3-6 ppm region) of **2b** in D<sub>2</sub>O: freshly prepared solution (**a**); following AgNO<sub>3</sub> (**b**) or NaBr addition (**c**). Spectra aligned to the **2b**/D<sub>2</sub>O solution to compensate ionic strength effects on chemical shift.

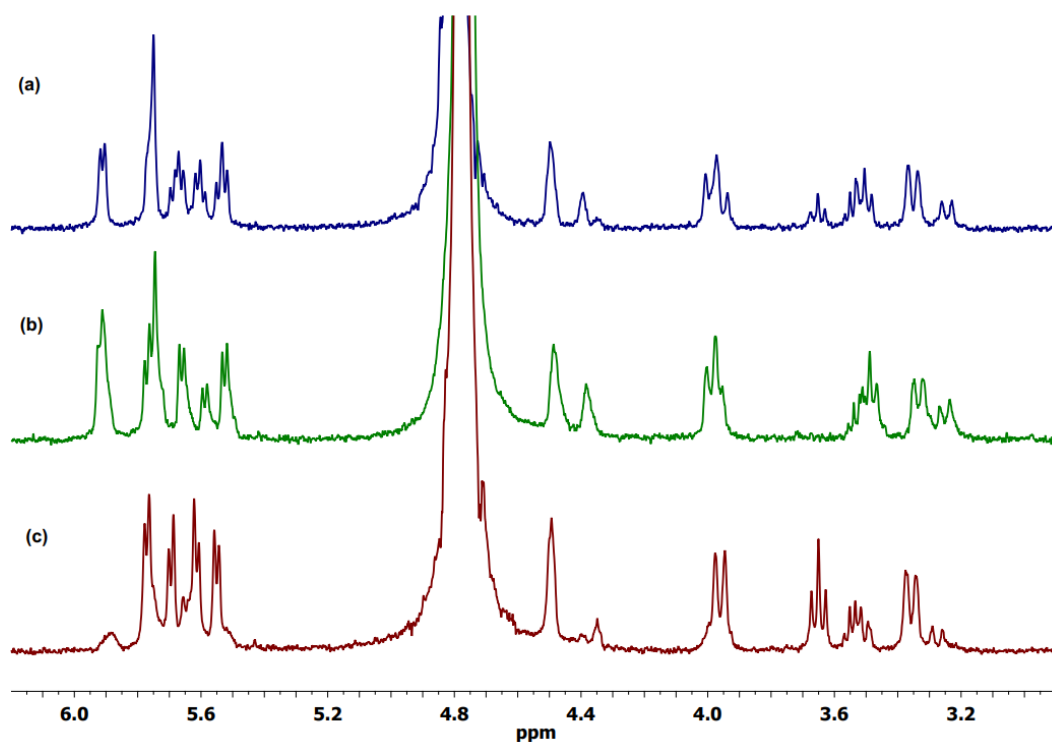

**[RuI( $\kappa^2N,O$ -Hyp)( $\eta^6$ -*p*-cymene)], **2c**, in D<sub>2</sub>O.**

**2c.** <sup>1</sup>H NMR (D<sub>2</sub>O, with excess  $\Gamma^-$ ):  $\delta$ /ppm = 6.04, 5.98 (d,  $J$  = 6.0 Hz, 1H); 5.93, 5.87, 5.85–5.81 (m, 2H); 5.73, 5.65 (d,  $J$  = 5.9 Hz, 1H); 4.64–4.60, 4.45–4.40 (m, 1H); 4.10 (d,  $J$  = 8.1 Hz), 4.07 (dd,  $J$  = 12.6, 1.8 Hz) (1H); 3.79 (t,  $J$  = 9.0 Hz), 3.74 (d,  $J$  = 3.7 Hz) (1H); 3.51 (dd,  $J$  = 12.5, 2.8 Hz), 3.48–3.44 (m) (1H); 2.91 (hept,  $J$  = 6.8 Hz, 1H); 2.27 (s), 2.24 (s), 2.23–2.18 (m) (4H), 2.15–2.04 (m, 1H); 1.38 (d,  $J$  = 6.9 Hz), 1.32 (d,  $J$  = 7.0 Hz) (6H). Isomer ratio = 6.5.

**Figure S68.** <sup>1</sup>H NMR spectra (3–6 ppm region) of **2c** in D<sub>2</sub>O: freshly prepared solution (**a**); following AgNO<sub>3</sub> (**b**) or NaI addition (**c**). Spectra aligned to the **2c**/D<sub>2</sub>O solution to compensate ionic strength effects on chemical shift.

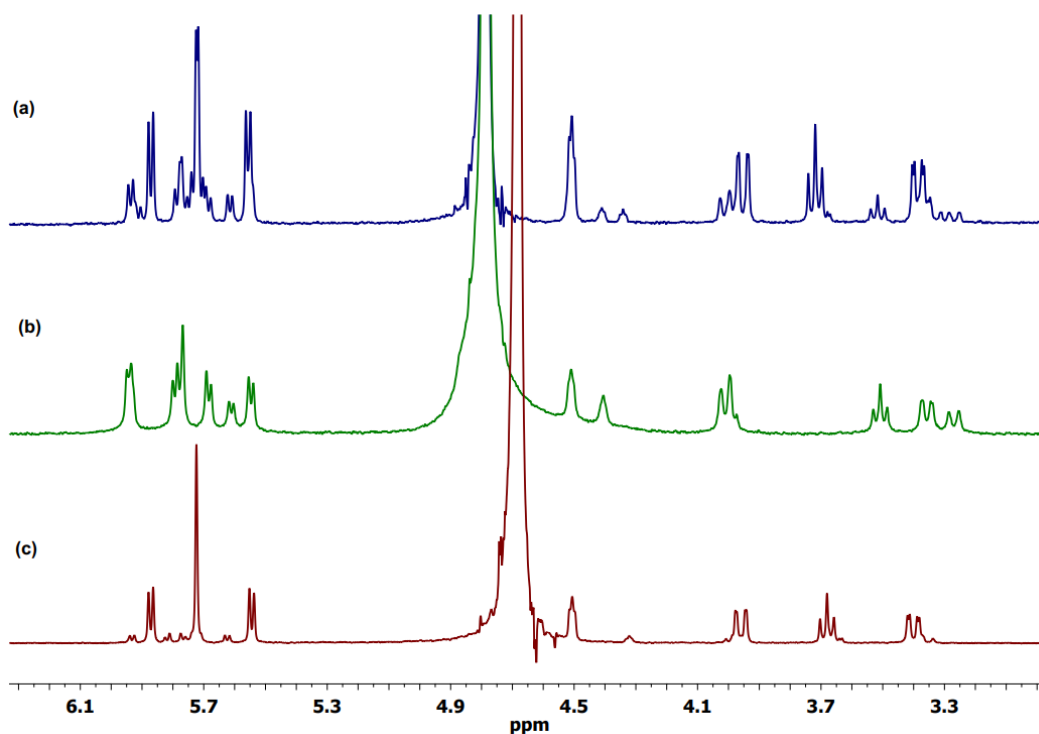

[Ru( $\kappa$ N-NCS)( $\kappa^2$ N,*O*-Hyp)( $\eta^6$ -*p*-cymene)], **2d**, in D<sub>2</sub>O or D<sub>2</sub>O/CD<sub>3</sub>OD 5:2 v/v.

**2d**. <sup>1</sup>H NMR (D<sub>2</sub>O):  $\delta$ /ppm = 5.84 (app-t), 5.76 (d,  $J$  = 6.0 Hz) (2H); 5.68, 5.65, 5.57 (d,  $J$  = 6.0 Hz, 2H); 4.55–4.45 (m, 1H); 4.07–3.97 (m); 3.92 (d,  $J$  = 12 Hz) (1H); 3.59 (app-t,  $J$  = 8.8 Hz), 3.42–3.31 (m) (1H); 3.23, 3.08 (dd,  $J$  = 12, 3 Hz, 1H); 2.77 (hept,  $J$  = 6.9 Hz, 1H); 2.26–2.16 (m, 1H); 2.14, 2.13 (s, 3H); 2.05–1.97, 1.79–1.60 (m, 1H); 1.34–1.25 (m, 6H). Isomer ratio = 1.5. Solubility of **2d** in D<sub>2</sub>O was insufficient to carry out a detailed speciation study.

<sup>1</sup>H NMR (D<sub>2</sub>O/CD<sub>3</sub>OD 5:2):  $\delta$ /ppm = 5.86, 5.84, 5.77 (d,  $J$  = 6.1 Hz) (2H); 5.72–5.68 (m, 1H); 5.66, 5.58 (d,  $J$  = 6.1 Hz, 1H); 4.53–4.44 (m, 1H); 3.99 (dd,  $J$  = 11.2, 7.7 Hz), 3.92 (d,  $J$  = 12.2 Hz) (1H); 3.60–3.53, 3.37–3.34 (m, 1H); 3.20, 3.09 (dd,  $J$  = 12.8, 3.5 Hz, 1H); 2.78 (hept,  $J$  = 6.9 Hz, 1H); 2.26–2.10 (m), 2.16 (s), 2.15 (s) (4H); 2.05–1.97, 1.79–1.69 (m, 1H); 1.32, 1.29 (d,  $J$  = 6.9 Hz, 6H). \*Superimposed to 2.16, 2.15. Isomer ratio = 1.3.

**Figure S69.** <sup>1</sup>H NMR spectra (3-6 ppm region) of **2d** in D<sub>2</sub>O/CD<sub>3</sub>OD 5:2: freshly prepared solution (**a**), following KSCN (**b**) or AgNO<sub>3</sub> addition (**c**); 24 h after AgNO<sub>3</sub> addition (**d**). Spectra aligned to the **2d**/D<sub>2</sub>O solution to compensate ionic strength effects on chemical shift.

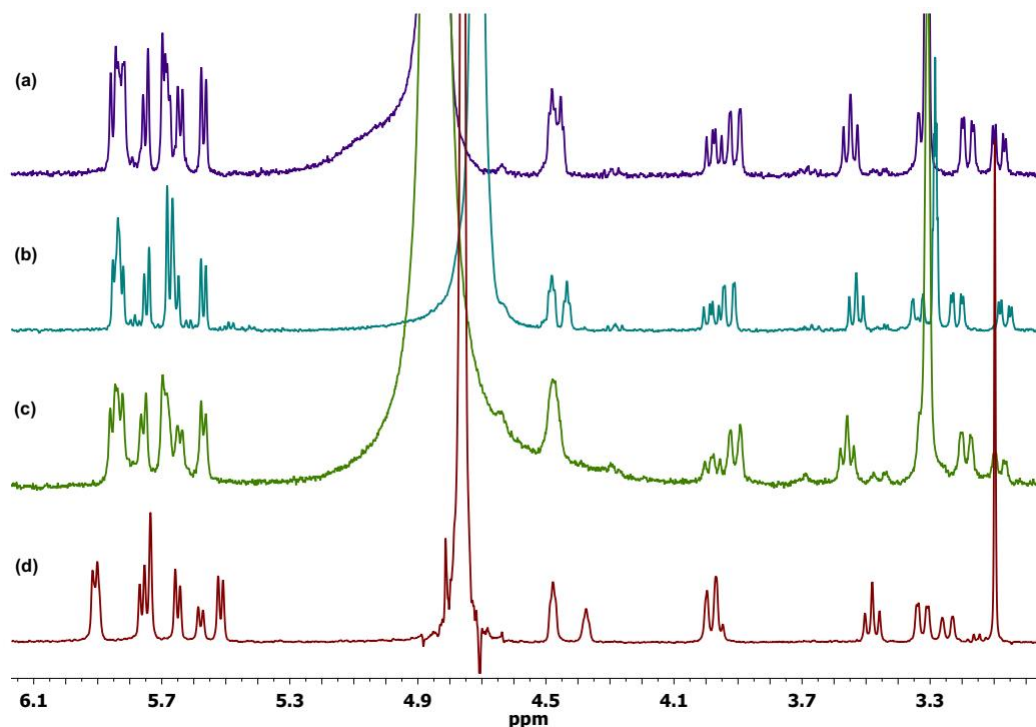

**[Ru(N<sub>3</sub>)(κ<sup>2</sup>N,*O*-Hyp)(η<sup>6</sup>-*p*-cymene)], **2e**, in D<sub>2</sub>O.**

**2e.** <sup>1</sup>H NMR (D<sub>2</sub>O): δ/ppm = 5.77 (app-t), 5.72, 5.67 (d, *J* = 5.9 Hz) (2H); 5.60, 5.56, 5.51 (d, *J* = 5.9 Hz, 2H); 4.49, 4.41 (app-t, *J* ≈ 3 Hz); 3.99 (dd, *J* = 10.9, 8.0 Hz), 3.90 (d, *J* = 10.6 Hz) (1H); 3.53 (app-t, *J* = 8.8 Hz), 3.21 (d, *J* = 14 Hz) (1H); 3.32, 2.92 (dd; *J* = 12.6, 2.8 Hz) (1H); 2.79 (hept, *J* = 6.9 Hz); 2.23–2.07 (m), 2.17 (s), 2.14 (s) (4H); 2.03–1.93, 1.76–1.66 (m, 1H); 1.35–1.24 (m, 6H). Isomer ratio = 2.

**Figure S70.** <sup>1</sup>H NMR spectra (3-6 ppm region) of **2e** in D<sub>2</sub>O: freshly prepared solution **(a)**, following NaN<sub>3</sub> **(b)** or AgNO<sub>3</sub> addition **(c)**, 24 h after AgNO<sub>3</sub> addition **(d)**. Spectra aligned to the **2e**/D<sub>2</sub>O solution to compensate ionic strength effects on chemical shift.

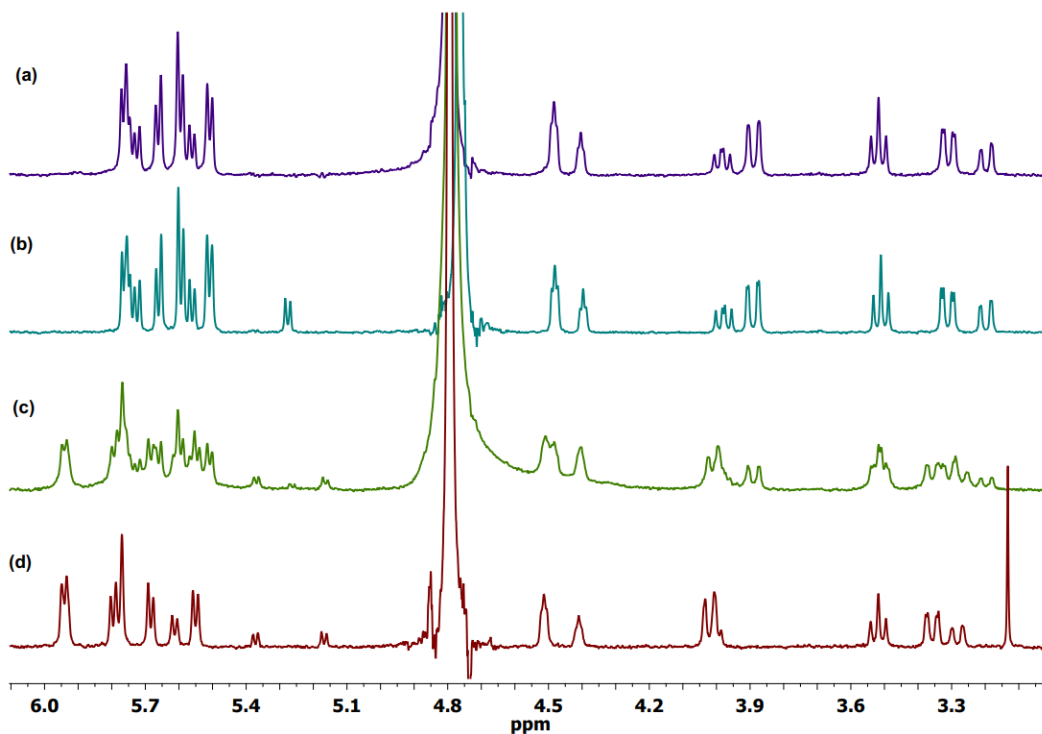



**[RuX( $\kappa^2N,O$ -Pro)( $\eta^6$ -*p*-cymene)], X = Cl (**1a**), Br (**1b**), I (**1c**) in cell culture medium (DMEM-d).**

**Figure S71.**  $^1\text{H}$  NMR spectra (4-6 ppm region) of freshly prepared solutions of: **1a** in  $\text{D}_2\text{O}$  (**a**); **1a** (**b**), **1b** (**c**) or **1c** (**d**) in DMEM-d. Spectra aligned to the **1a**/ $\text{D}_2\text{O}$  solution to compensate ionic strength effects on chemical shift.

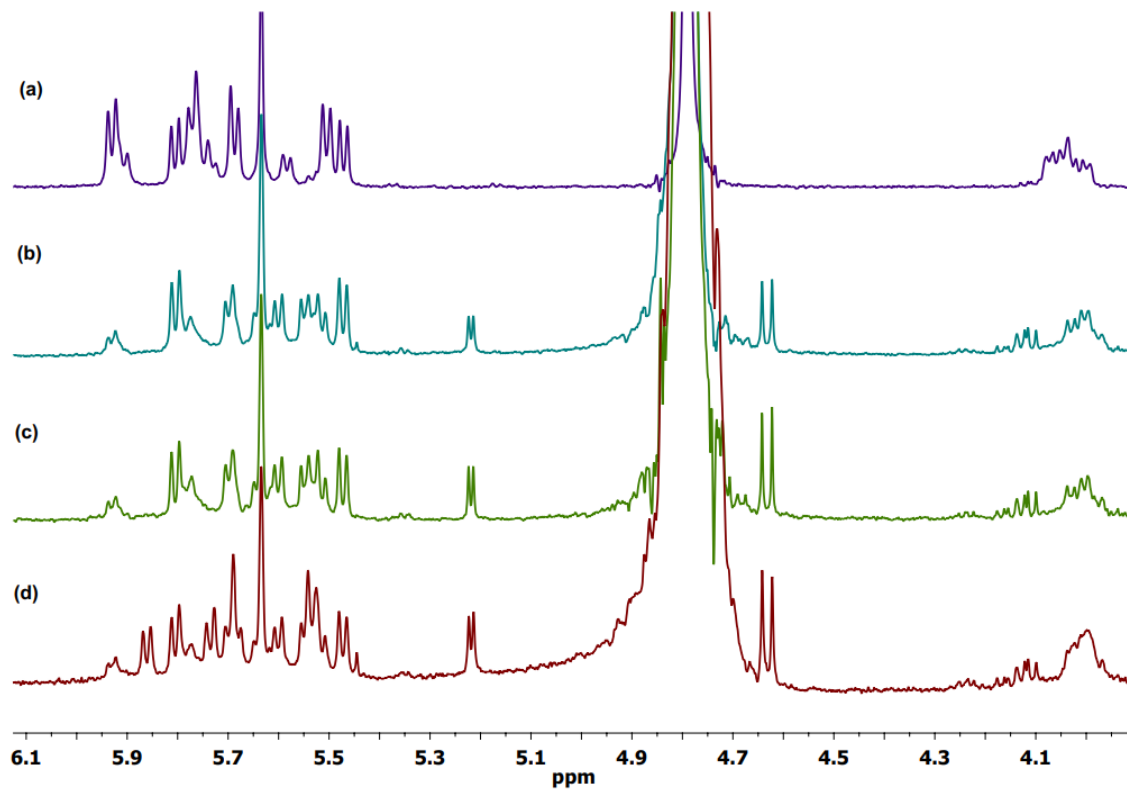

**[RuX( $\kappa^2N,O$ -Hyp)( $\eta^6$ -*p*-cymene)], X = Cl (**2a**), Br (**2b**), I (**2c**) in cell culture medium (DMEM-d).**

**Figure S72.**  $^1\text{H}$  NMR spectra (4-6 ppm region) of freshly prepared solutions of: **2a** in  $\text{D}_2\text{O}$  (**a**); **2a** (**b**), **2b** (**c**) or **2c** (**d**) in DMEM-d. Spectra aligned to the **1a**/ $\text{D}_2\text{O}$  solution to compensate ionic strength effects on chemical shift.

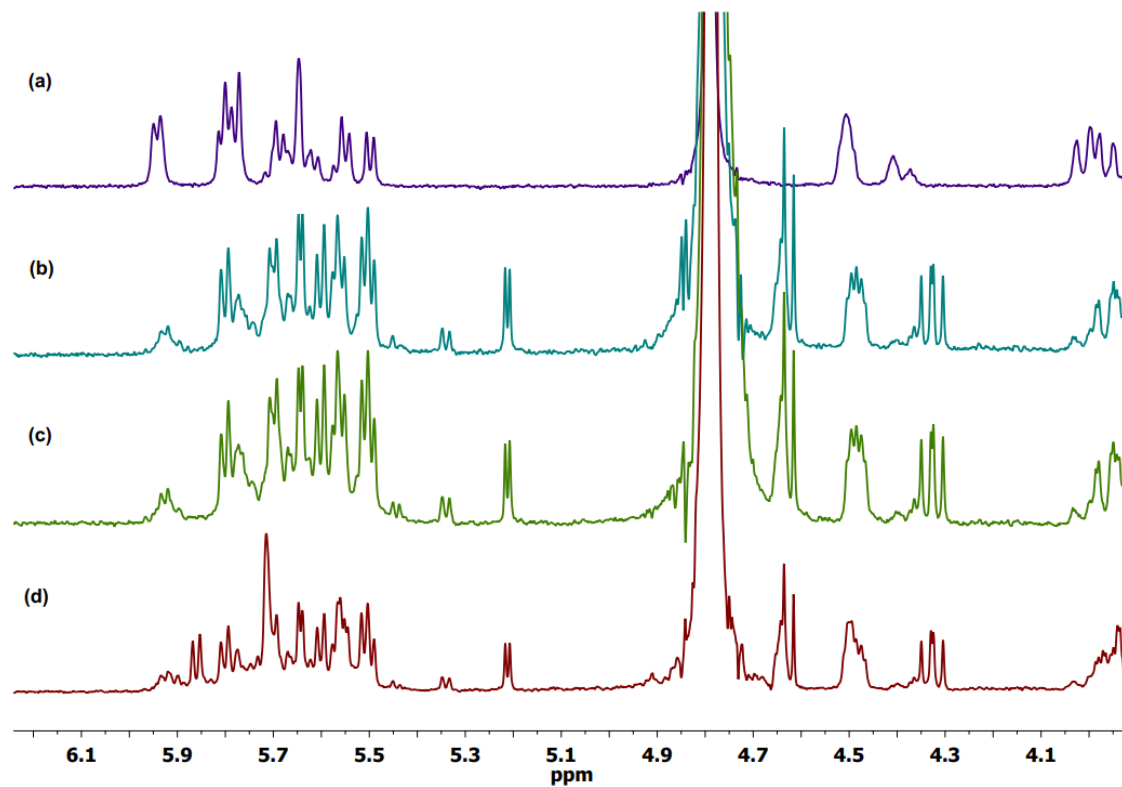

## Stability in water and in cell culture medium.

[Ru( $\kappa N$ -NCS)( $\kappa^2 N, O$ -Pro)( $\eta^6$ -*p*-cymene)], **1d**, in in D<sub>2</sub>O/CD<sub>3</sub>OD or DMEM-d/CD<sub>3</sub>OD 5:2 v/v.

**Figure S73.** <sup>1</sup>H NMR spectra (3-6 ppm region) of: **1d** in D<sub>2</sub>O/CD<sub>3</sub>OD 5:2 v/v, freshly prepared solution **(a)** and after 48 h at 37 °C **(b)**; **1d** in DMEM-d/CD<sub>3</sub>OD 5:2 v/v, freshly prepared solution **(c)** and after 24 h at 37 °C **(d)**; **1a** in D<sub>2</sub>O **(e)**. Spectral changes from **(a)** to **(b)** represent a variation in the diastereomeric ratio.

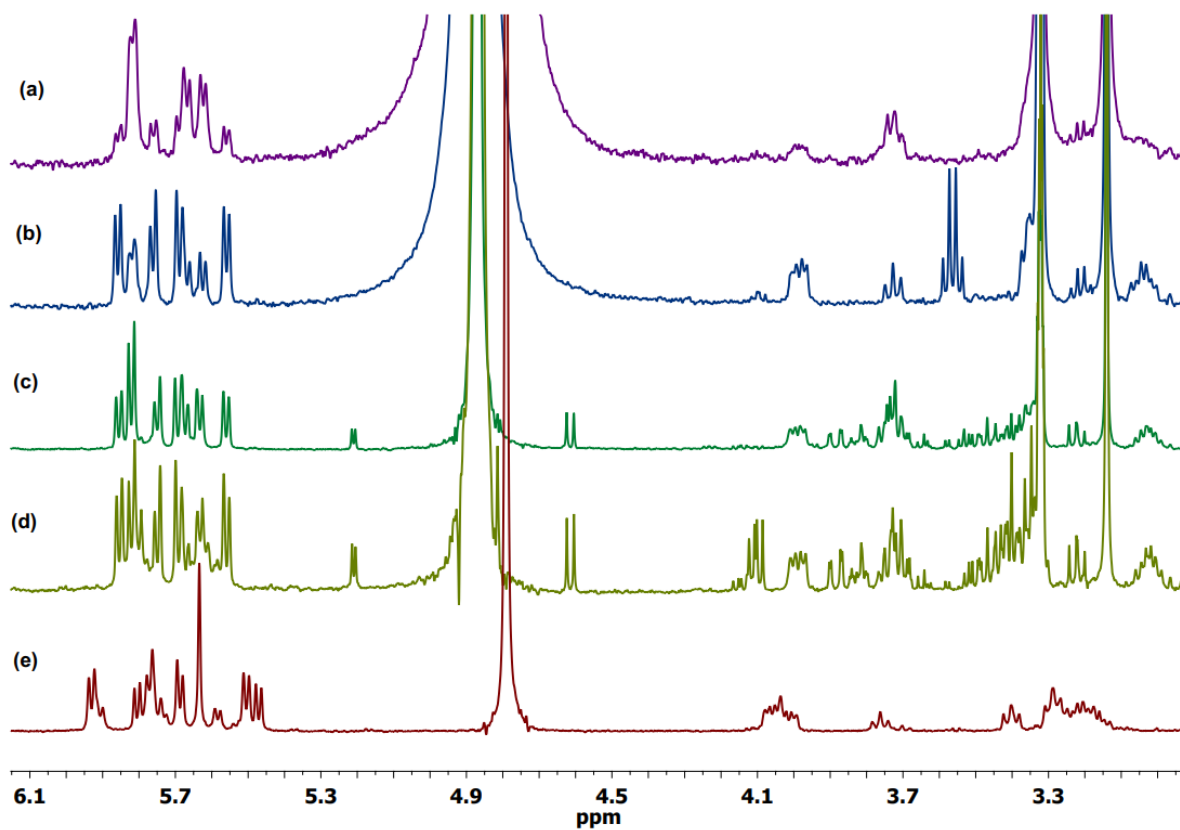

**[Ru(N<sub>3</sub>)(κ<sup>2</sup>N,*O*-Pro)(η<sup>6</sup>-*p*-cymene)], 1e, in D<sub>2</sub>O and DMEM-d.**

**Figure S74.** <sup>1</sup>H NMR spectra (3-6 ppm region) of: **1e** in D<sub>2</sub>O, freshly prepared solution **(a)** and after 48 h at 37 °C **(b)**; **1e** in DMEM-d, freshly prepared solution **(c)** and after 24 h at 37 °C **(d)**; **1a** in D<sub>2</sub>O **(e)**.

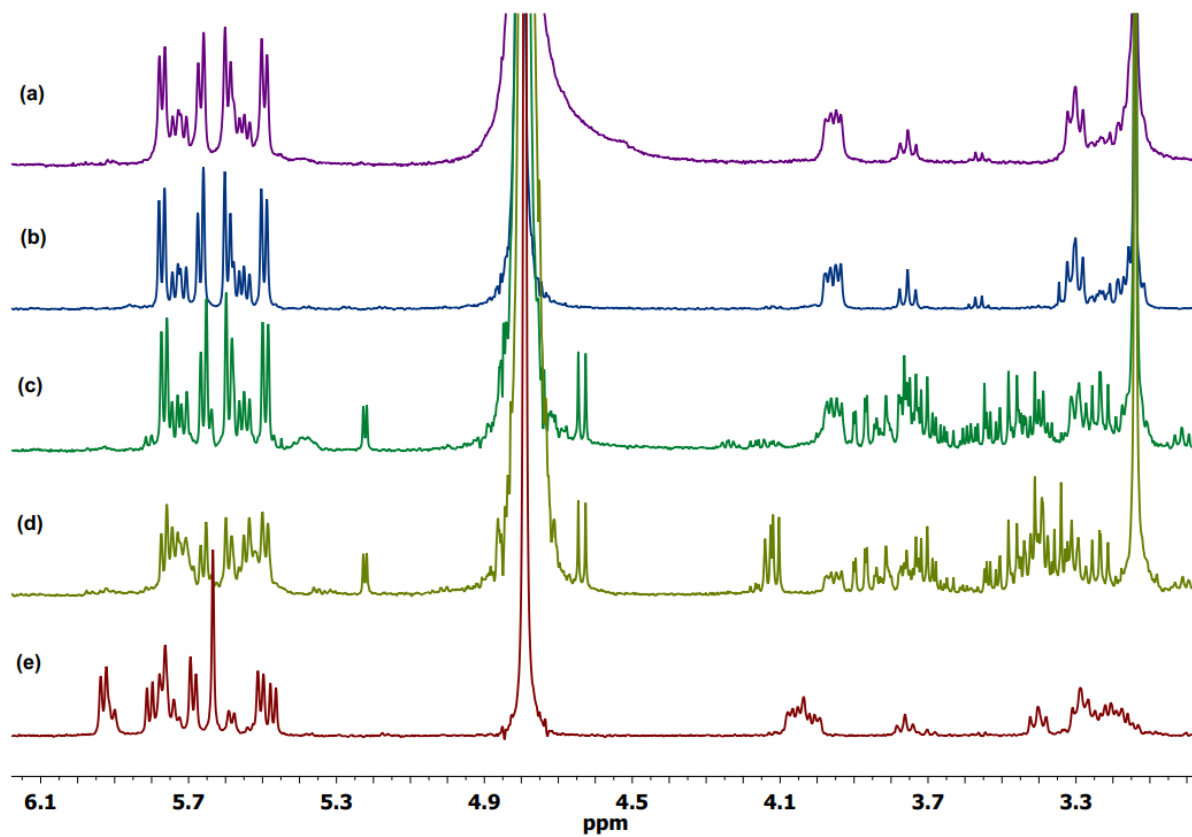

**[Ru( $\kappa$ N-NCS)( $\kappa^2$ N,*O*-Hyp)( $\eta^6$ -*p*-cymene)], 2d, in D<sub>2</sub>O and DMEM-d.**

**Figure S75.** <sup>1</sup>H NMR spectra (3-6 ppm region) of: **2d** in D<sub>2</sub>O/CD<sub>3</sub>OD 5:2 v/v, freshly prepared solution **(a)** and after 48 h at 37 °C **(b)**; **2d** in DMEM-d/CD<sub>3</sub>OD 5:2 v/v, freshly prepared solution **(c)** and after 24 h at 37 °C **(d)**; **2a** in D<sub>2</sub>O **(e)**.

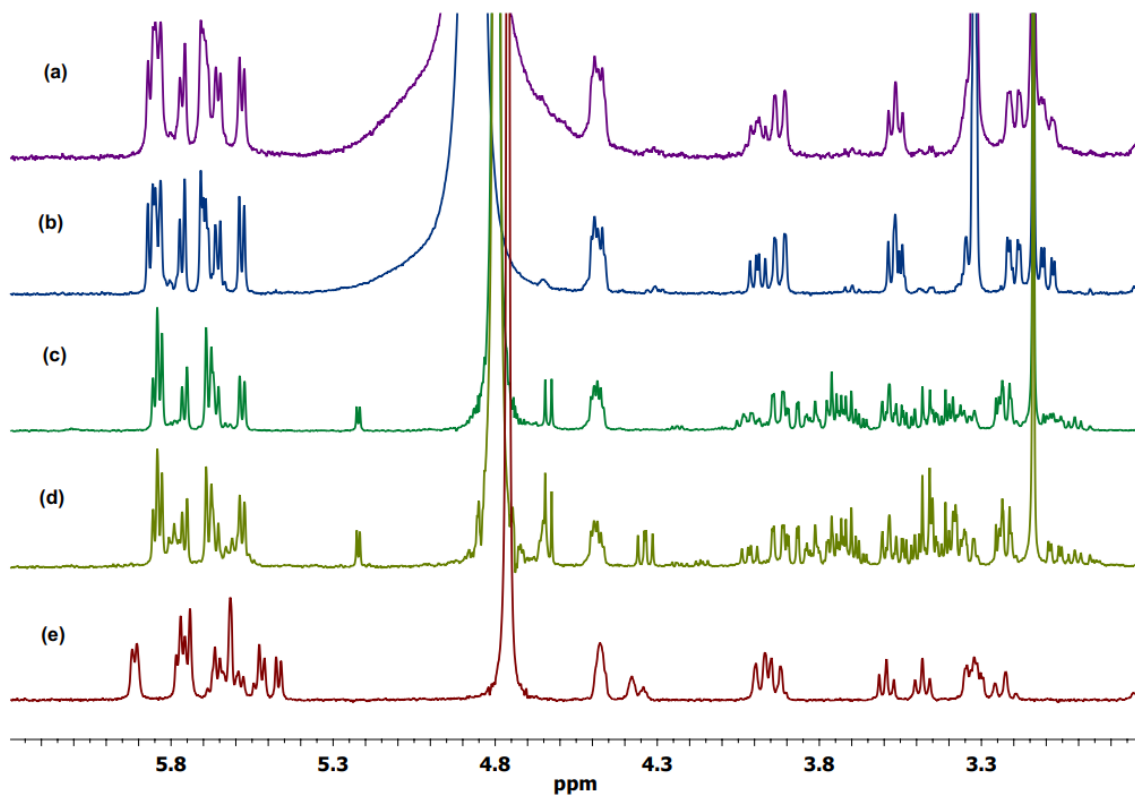

**[Ru(N<sub>3</sub>)(κ<sup>2</sup>N,*O*-Hyp)(η<sup>6</sup>-*p*-cymene)], 2e, in D<sub>2</sub>O and DMEM-d.**

**Figure S76.** <sup>1</sup>H NMR spectra (3-6 ppm region) of: **1e** in D<sub>2</sub>O, freshly prepared solution **(a)** and after 48 h at 37 °C **(b)**; **2e** in DMEM-d, freshly prepared solution **(c)** and after 24 h at 37 °C **(d)**; **2a** in D<sub>2</sub>O **(e)**.

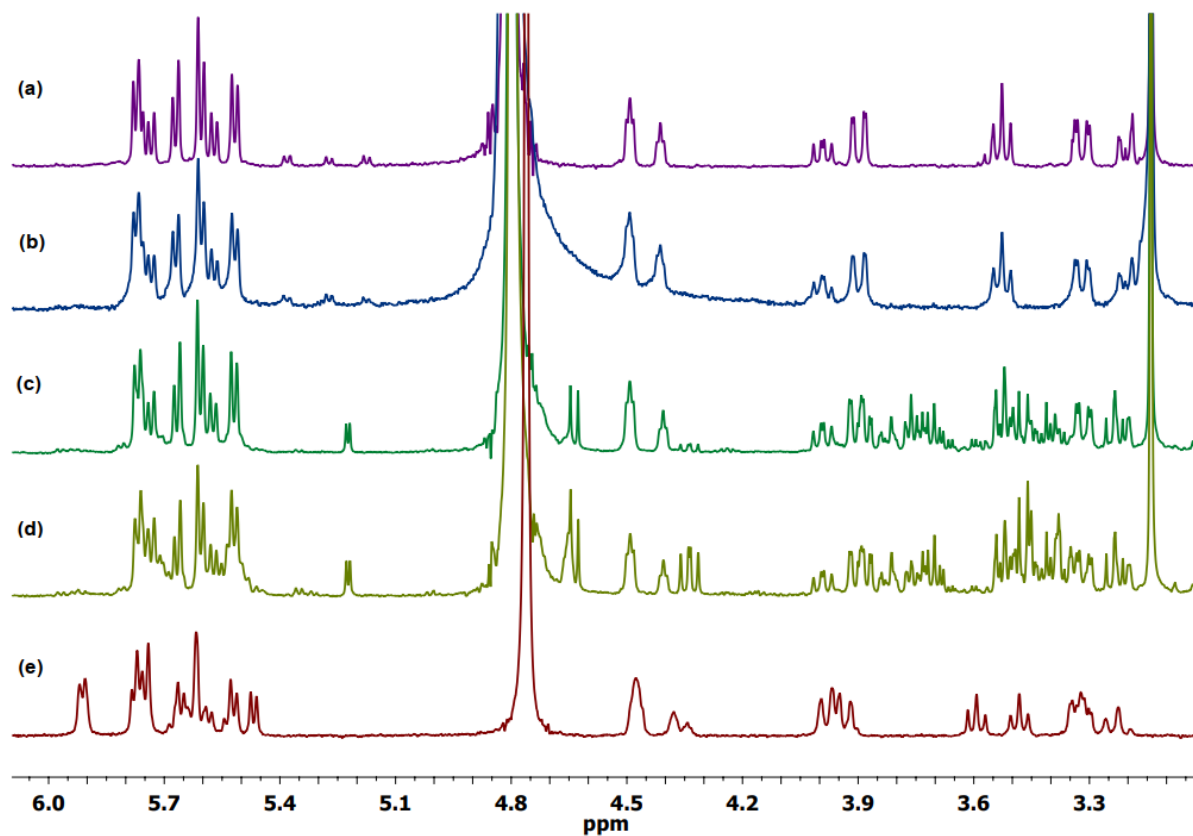

**[Ru( $\kappa^3N,O,O'$ -Ser)( $\eta^6$ -*p*-cymene)], **3h**, in D<sub>2</sub>O and DMEM-d.**

**3h**. <sup>1</sup>H NMR (D<sub>2</sub>O):  $\delta$ /ppm = 5.62, 5.59 (d,  $J$  = 6.2 Hz, 2H); 5.36 (d,  $J$  = 6.1 Hz, 2H); 3.31 (d,  $J$  = 2.4 Hz, 1H), 3.19 (d,  $J$  = 9.9, 2.6 Hz, 1H), 3.04 (d,  $J$  = 9.8 Hz, 1H), 2.79 (hept,  $J$  = 6.9 Hz, 1H), 2.22 (s, 3H); 1.28 (d,  $J$  = 6.9 Hz, 6H).

**Figure S77.** <sup>1</sup>H NMR spectra (3-6 ppm region) of: **3h** in D<sub>2</sub>O, freshly prepared solution (a) and after 48 h at 37 °C (b); **3h** in DMEM-d, freshly prepared solution (c) and after 24 h at 37 °C (d); **3a** in D<sub>2</sub>O (e).

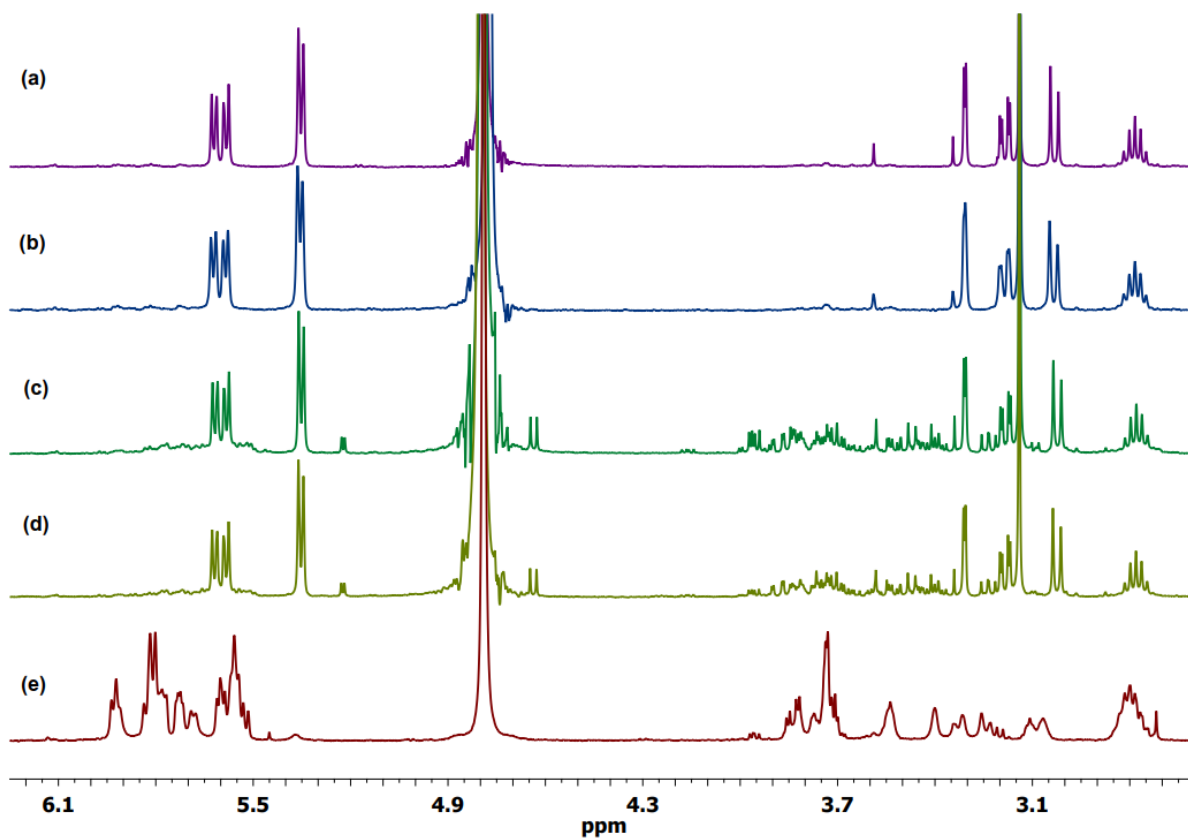

**[Ru( $\kappa^3N,O,O'$ -Thr)( $\eta^6$ -*p*-cymene)], **4h**, in D<sub>2</sub>O and DMEM-d.**

**4h.** <sup>1</sup>H NMR (D<sub>2</sub>O):  $\delta$ /ppm = 5.61, 5.51 (d,  $J$  = 5.9 Hz, 2H); 5.45, 5.35 (d,  $J$  = 5.9 Hz, 2H); 3.32 (q,  $J$  = 6.4 Hz, 1H), 3.08 (s, 1H), 2.80 (hept,  $J$  = 6.9 Hz, 1H), 2.22 (s, 3H); 1.29, 1.28 (d,  $J$  = 6.9 Hz, 6H); 0.97 (d,  $J$  = 6.4 Hz, 3H).

**Figure S78.** <sup>1</sup>H NMR spectra (3-6 ppm region) of: **4h** in D<sub>2</sub>O, freshly prepared solution **(a)** and after 48 h at 37 °C **(b)**; **4h** in DMEM-d, freshly prepared solution **(c)** and after 24 h at 37 °C **(d)**; **4a** in D<sub>2</sub>O **(e)**.

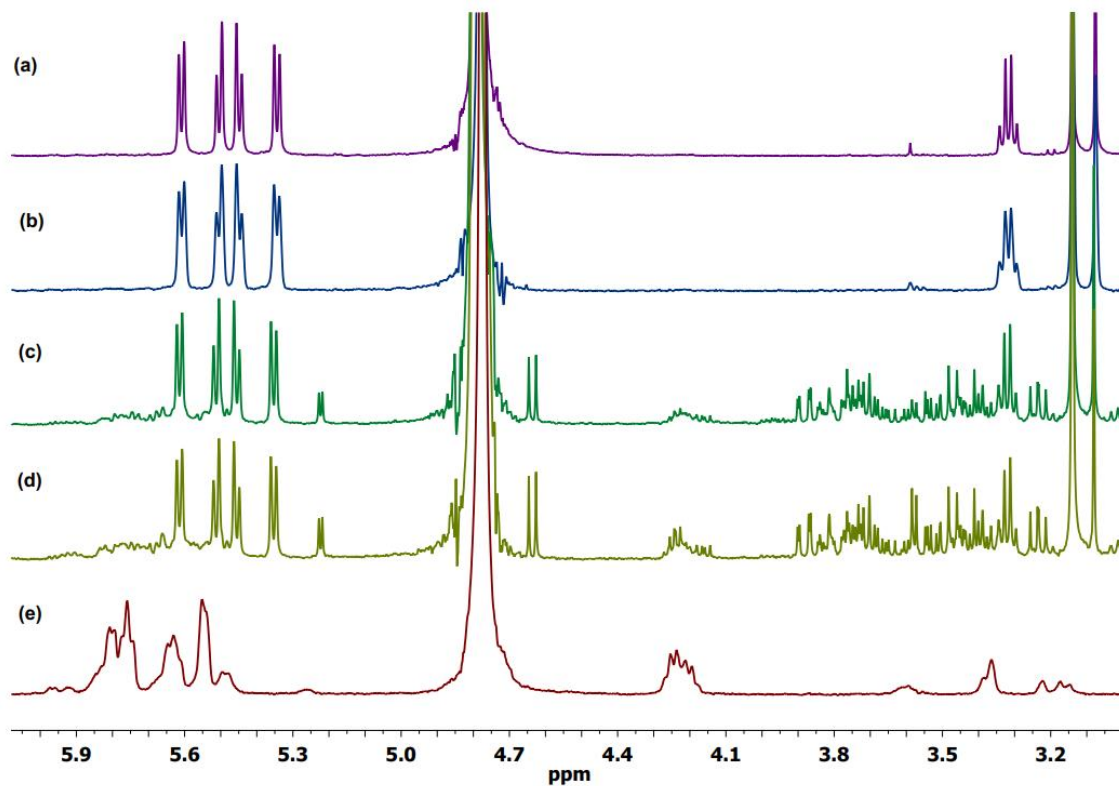



**[Ru( $\kappa^2N,O$ -Ser)( $\kappa P$ -pta)( $\eta^6$ -*p*-cymene)]Cl, [3i]Cl in D<sub>2</sub>O and DMEM-d.**

**[3i]<sup>+</sup>.** <sup>1</sup>H NMR (D<sub>2</sub>O):  $\delta$ /ppm = 6.17–6.06 (m, 3H), 5.89 (t,  $J$  = 5.6 Hz, 1H); 4.62, 4.60 (s, 6H); 4.37–4.24 (m, 6H), 4.06–3.95 (m, 1H); 3.93, 3.31 (t,  $J$  = 3.7 Hz, 1H), 3.88 (dd,  $J$  = 12.0, 3.4 Hz), 3.76–3.71 (m) (1H); 2.59 (hept,  $J$  = 7.1 Hz, 1H); 2.05, 2.03 (s, 2H); 1.18 (t,  $J$  = 6.2 Hz, 6H). <sup>31</sup>P{<sup>1</sup>H} NMR (D<sub>2</sub>O):  $\delta$ /ppm = –36.4, –36.7. Isomer ratio = 1.3.

**Figure S79.** <sup>1</sup>H NMR spectra (3-6 ppm region) of: [3i]<sup>+</sup> in D<sub>2</sub>O, freshly prepared solution (a) and after 48 h at 37 °C (b); [3i]<sup>+</sup> in DMEM-d, freshly prepared solution (c) and after 24 h at 37 °C (d); 3a in D<sub>2</sub>O (e).

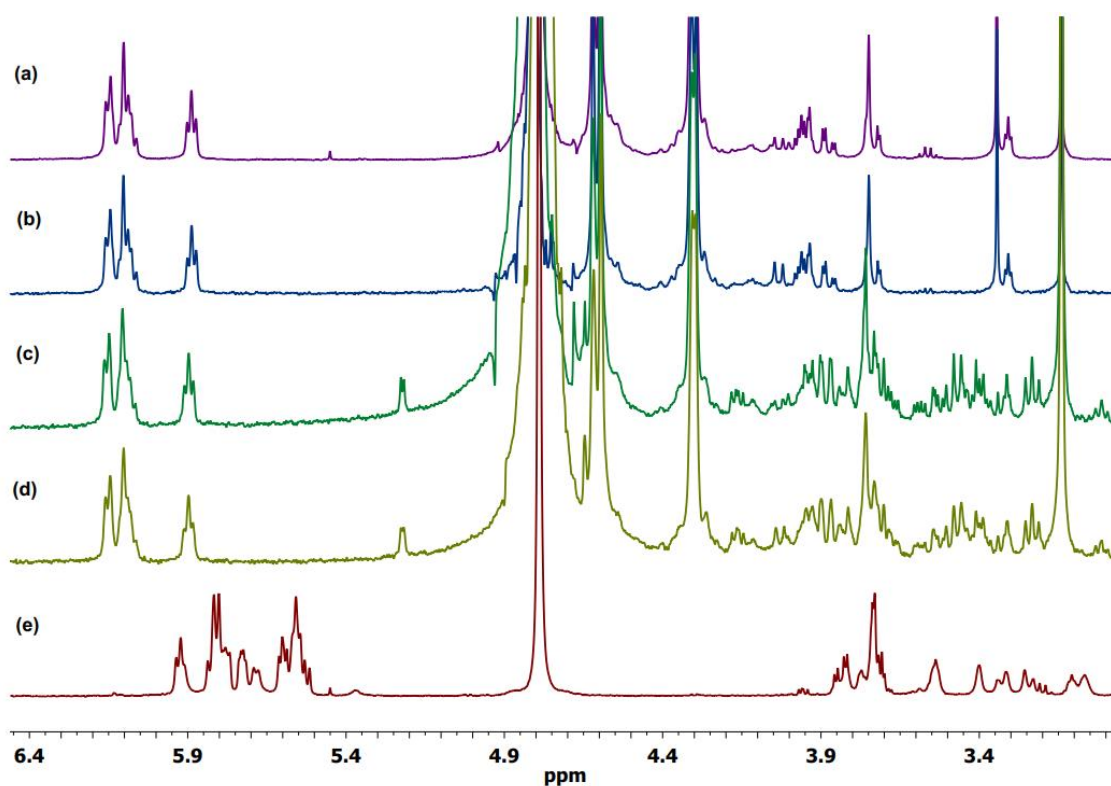

## UV-Vis spectra of 4d for Log $P_{ow}$ measurement

**Figure S80.** UV-Vis spectra of  $[\text{Ru}(\kappa\text{N-NCS})(\kappa^2\text{N},\text{O-Hyp})(\eta^6\text{-}p\text{-cymene})]$ , **2d** for Log  $P_{ow}$  measurement: initial spectrum in the aqueous stock solution (blue line), spectra after partition in the aqueous phase (light blue / cyan lines) and in the octanol phase (yellow / orange lines); x3 replicates.

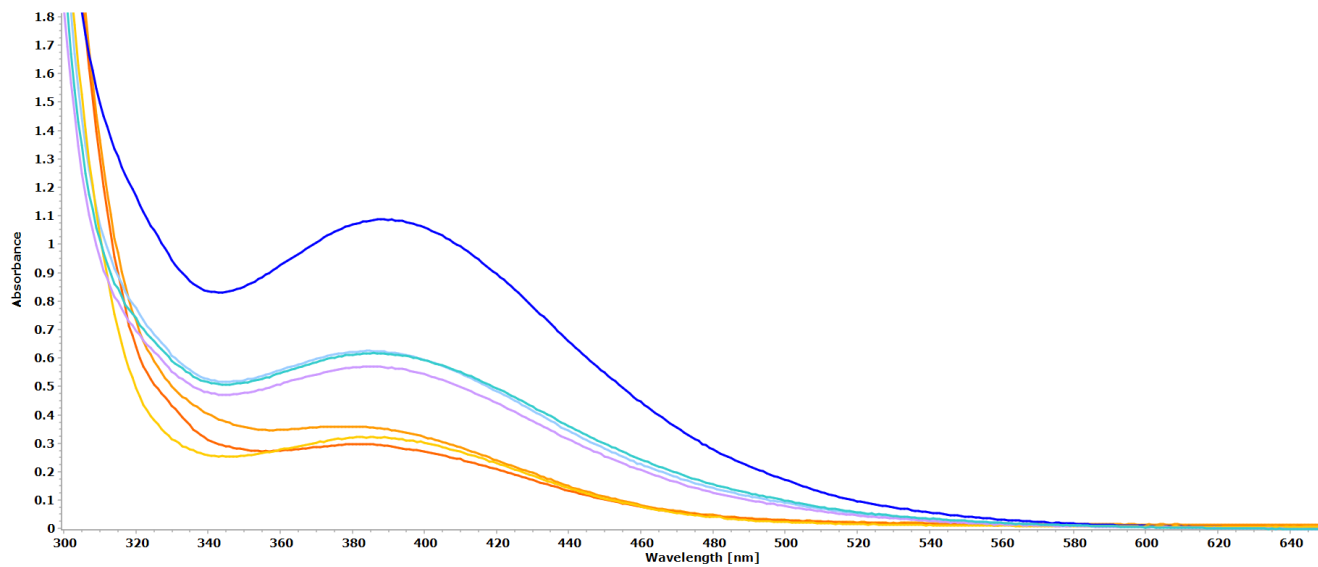

## Mass spectra following incubation with Cyt c

**Figure S81.** Deconvoluted ESI mass spectrum of Cyt c in 2 mM ammonium acetate solution, pH 6.8, incubated with compound **1a** for 72 h at 37 °C. The final protein concentration was  $10^{-7}$  M with a complex to protein molar ratio of 3:1. 0.1% v/v of formic acid was added just before infusion.

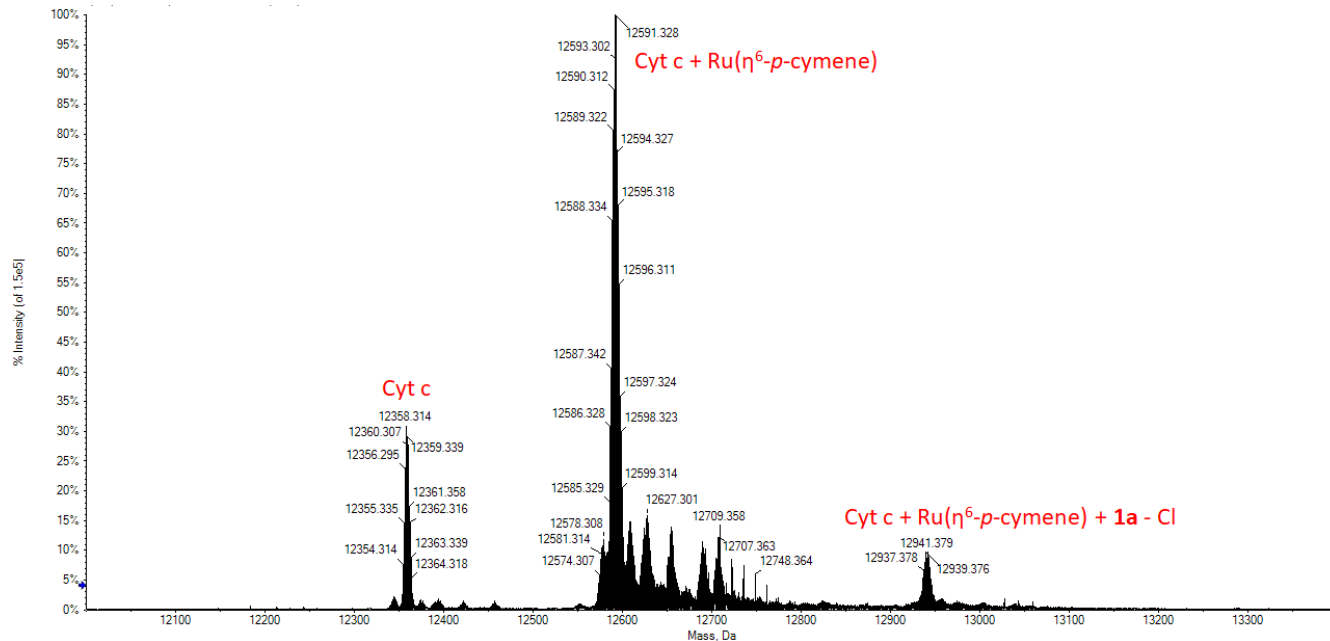

**Figure S82.** Deconvoluted ESI mass spectrum of Cyt c in 2 mM ammonium acetate solution, pH 6.8, incubated with compound **1d** for 24 h at 37 °C. The final protein concentration was  $10^{-7}$  M with a complex to protein molar ratio of 3:1. 0.1% v/v of formic acid was added just before infusion.

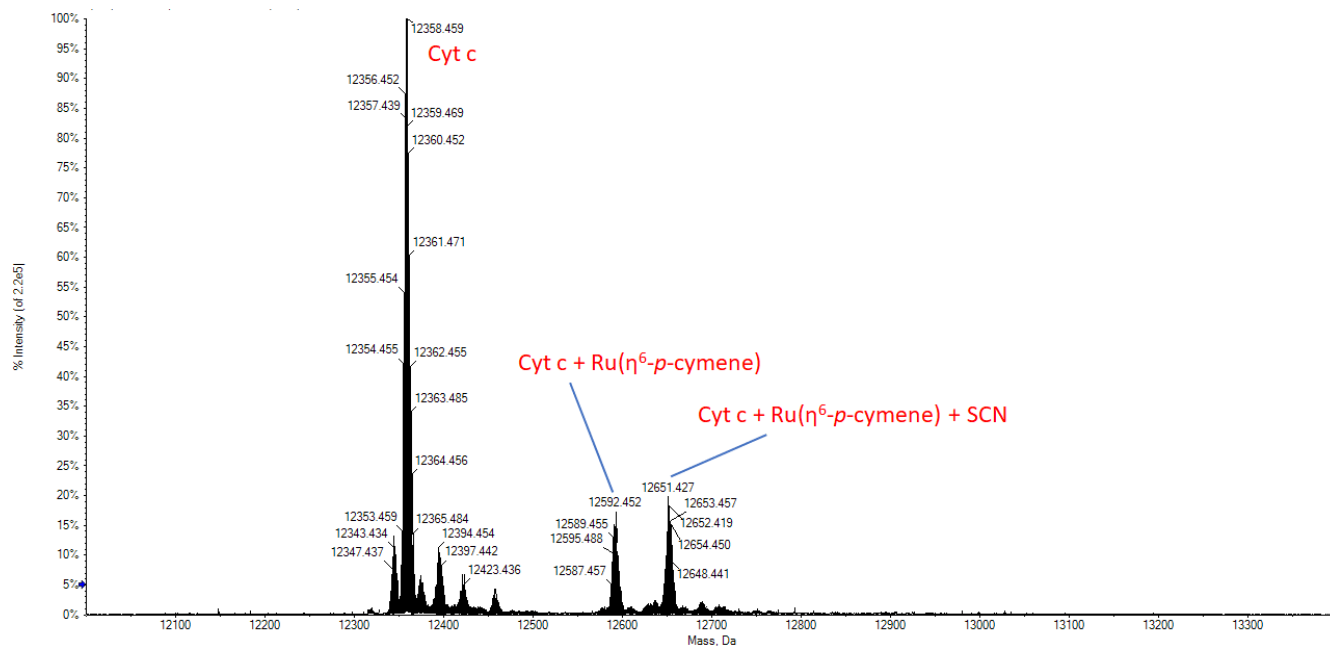

**Figure S83.** Deconvoluted ESI mass spectrum of Cyt c in 2 mM ammonium acetate solution, pH 6.8, incubated with compound **1d** for 72 h at 37 °C. The final protein concentration was  $10^{-7}$  M with a complex to protein molar ratio of 3:1. 0.1% v/v of formic acid was added just before infusion.

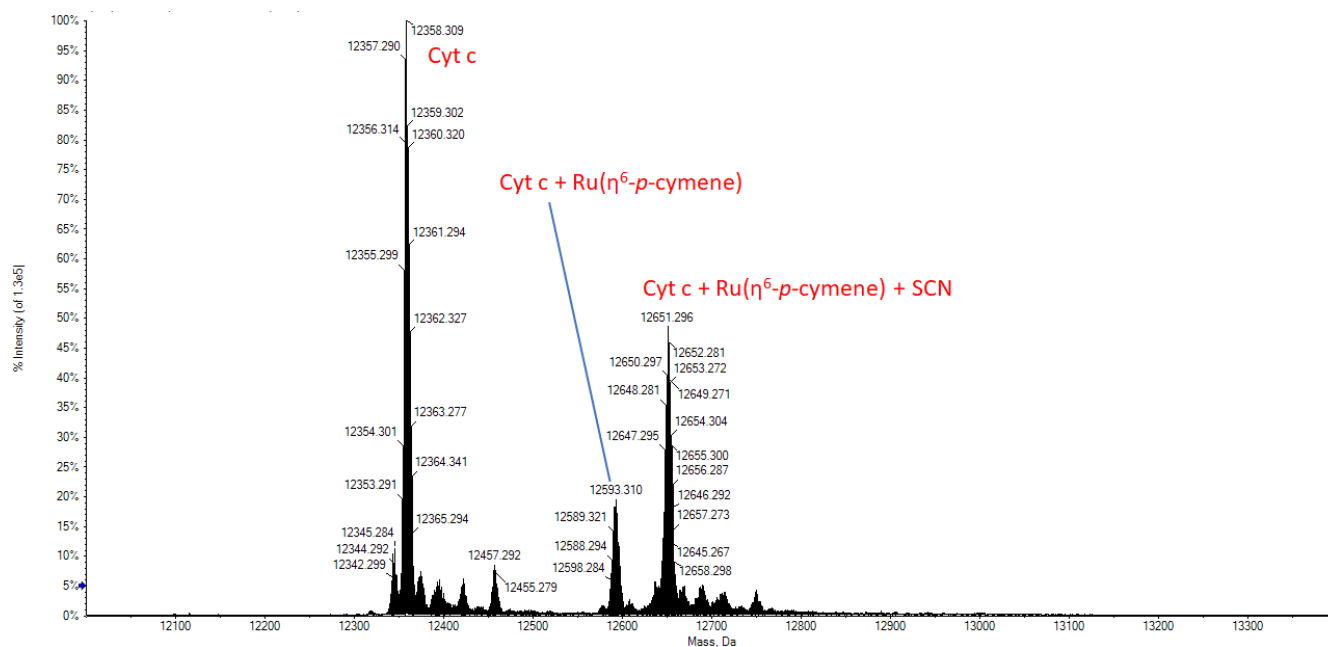

**Figure S84.** Deconvoluted ESI mass spectrum of Cyt c in 2 mM ammonium acetate solution, pH 6.8, incubated with compound **4h** for 24 h at 37 °C. The final protein concentration was  $10^{-7}$  M with a complex to protein molar ratio of 3:1. 0.1% v/v of formic acid was added just before infusion.

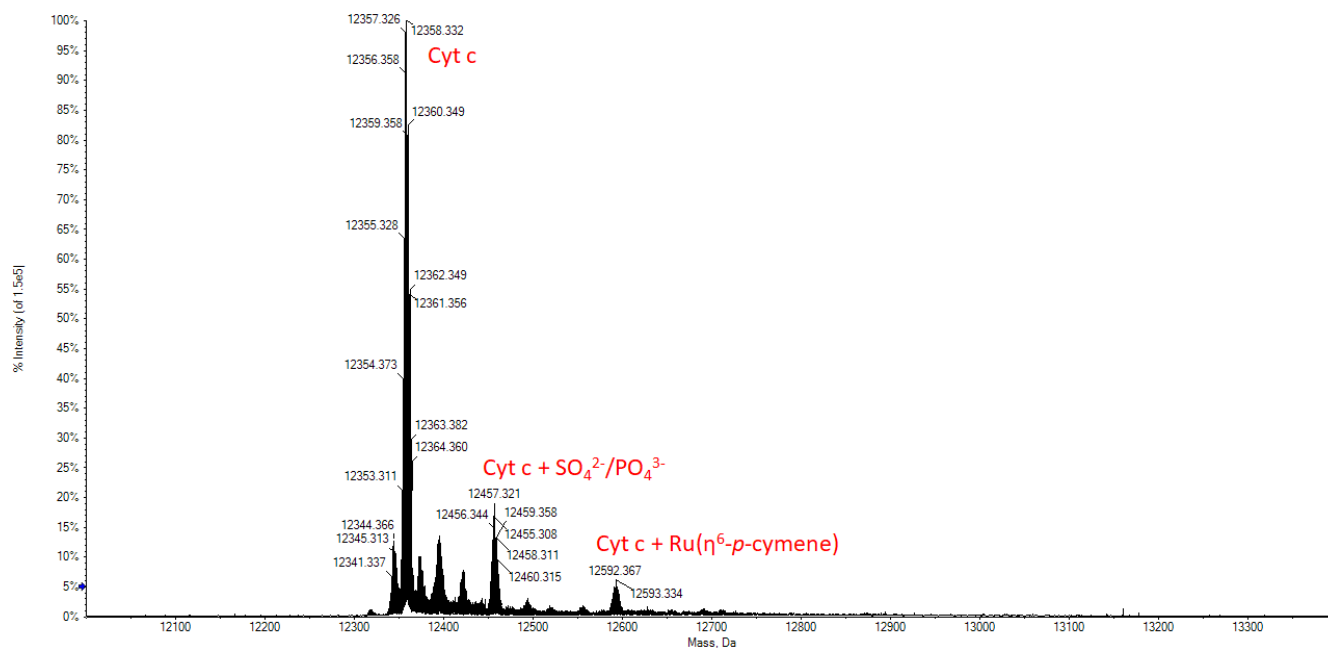

**Figure S85.** Deconvoluted ESI mass spectrum of Cyt c in 2 mM ammonium acetate solution, pH 6.8, incubated with compound **4h** for 72 h at 37 °C. The final protein concentration was  $10^{-7}$  M with a complex to protein molar ratio of 3:1. 0.1% v/v of formic acid was added just before infusion.

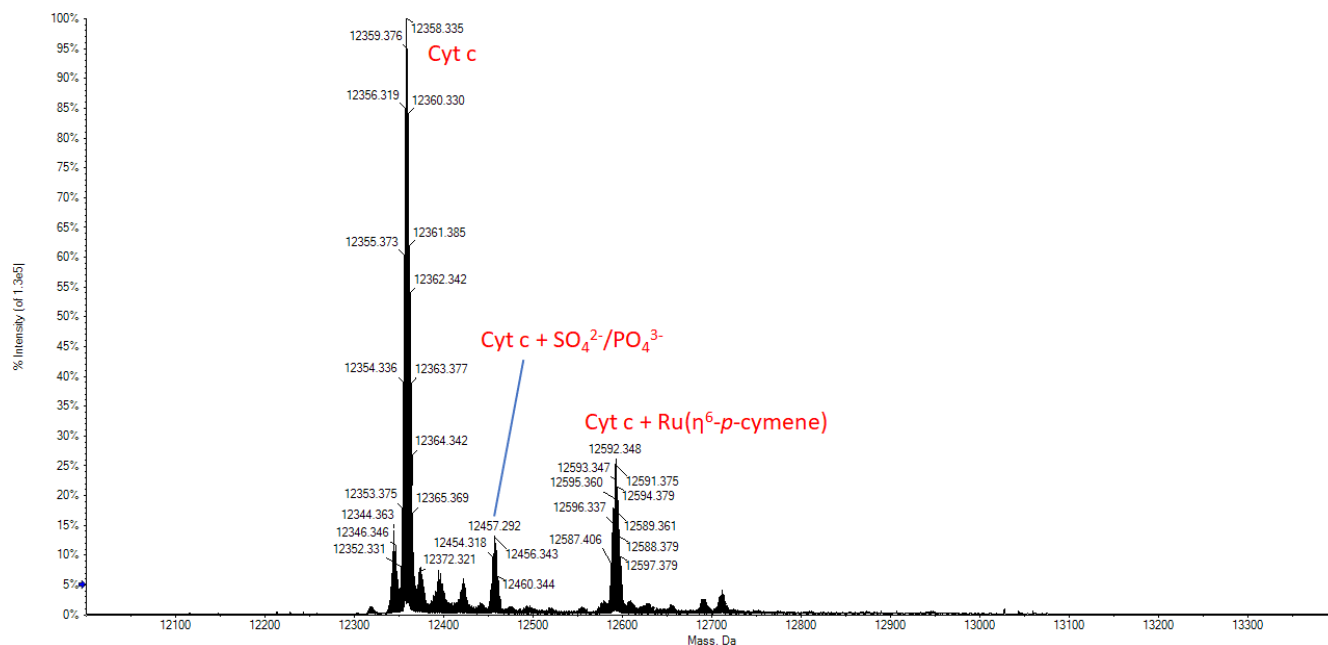

**Figure S86.** Deconvoluted ESI mass spectrum of Cyt c in 2 mM ammonium acetate solution, pH 6.8, incubated with compound **[3i]Cl** for 24 h at 37 °C. The final protein concentration was  $10^{-7}$  M with a complex to protein molar ratio of 3:1. 0.1% v/v of formic acid was added just before infusion.

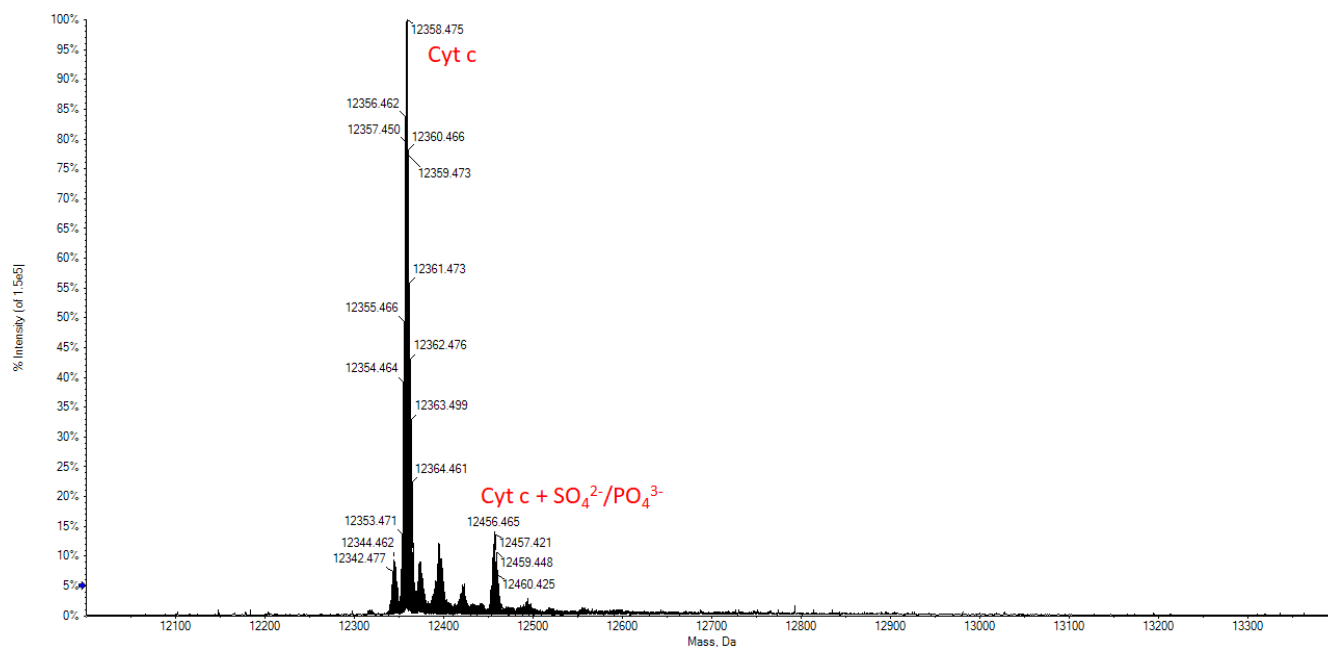

**Figure S87.** Deconvoluted ESI mass spectrum of Cyt c in 2 mM ammonium acetate solution, pH 6.8, incubated with compound [3i]Cl for 72 h at 37 °C. The final protein concentration was  $10^{-7}$  M with a complex to protein molar ratio of 3:1. 0.1% v/v of formic acid was added just before infusion.

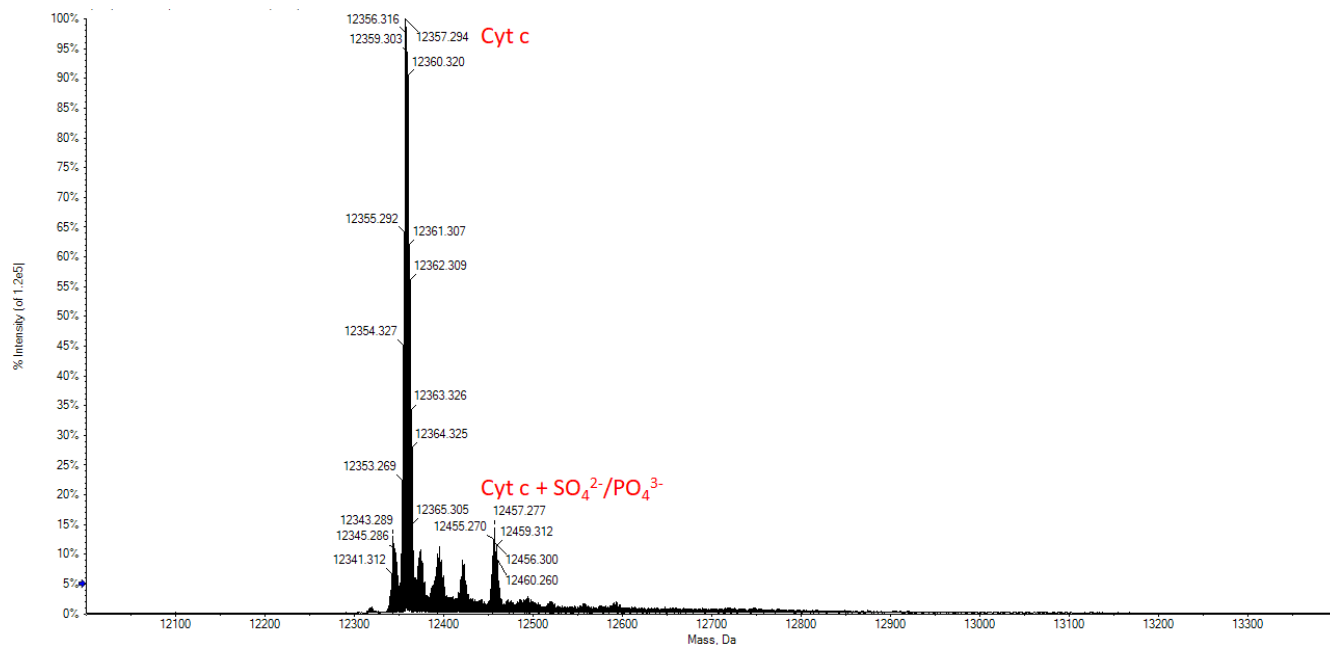

## References.

- 
- 1 L. Biancalana, I. Abdalghani, F. Chiellini, S. Zacchini, G. Pampaloni, M. Crucianelli and F. Marchetti, *Eur. J. Inorg. Chem.* 2018, 3041–3057.
  - 2 (a) NaN<sub>3</sub>: R. T. M. Fraser, *Anal. Chem.* 1959, **31**, 1602–1603; (b) KCN: G. E. Leroi and W. Klemperer, *J. Chem. Phys.* 1961, **35**, 774 and SDBSWeb: <https://sdfs.db.aist.go.jp> (National Institute of Advanced Industrial Science and Technology, 05/2021); (c) [Ru(N<sub>3</sub>)<sub>2</sub>(η<sup>6</sup>-C<sub>6</sub>Me<sub>6</sub>)]<sub>2</sub>: P. Govindaswamy, H. P. Yennawar and M. Rao Kollipara, *J. Organomet. Chem.* 2004, **689**, 3108–3112.
  - 3 J. Feeney and A. S. V. Burgen, *Eur. J. Biochem.* 1973, **34**, 107-111.
